# Supplementary material for: Sociodemographic and clinical risk factors for paediatric typical haemolytic uraemic syndrome: retrospective cohort study
Source: PubMed Central journal article supplement (PMC6936988; doi:10.1136/bmjpo-2019-000465), 2019-12-17
Supplement: bmjpo-2019-000465.draft_revisions.pdf [file bmjpo-2019-000465.draft_revisions.pdf]

# BMJ Paediatrics Open

BMJ Paediatrics Open is committed to open peer review. As part of this commitment we make the peer review history of every article we publish publicly available.

When an article is published we post the peer reviewers' comments and the authors' responses online. We also post the versions of the paper that were used during peer review. These are the versions that the peer review comments apply to.

The versions of the paper that follow are the versions that were submitted during the peer review process. They are not the versions of record or the final published versions. They should not be cited or distributed as the published version of this manuscript.

BMJ Paediatrics Open is an open access journal and the full, final, typeset and author-corrected version of record of the manuscript is available on our site with no access controls, subscription charges or pay-per-view fees (<http://bmjpaedsopen.bmj.com>).

If you have any questions on BMJ Paediatrics Open's open peer review process please email [info.bmjpo@bmj.com](mailto:info.bmjpo@bmj.com)

# BMJ Paediatrics Open

## Sociodemographic and clinical risk-factors for paediatric typical haemolytic uraemic syndrome

|                               |                                                                                                                                                                                                                                                                                                                                                                                                                                                                                                                                                                                                                                                                                                                                                                                                                                                                                                                                                                                                                                                                                                                                                                                                                                                                                                                                                                                                                                                                                                                                                                                                                                                           |
|-------------------------------|-----------------------------------------------------------------------------------------------------------------------------------------------------------------------------------------------------------------------------------------------------------------------------------------------------------------------------------------------------------------------------------------------------------------------------------------------------------------------------------------------------------------------------------------------------------------------------------------------------------------------------------------------------------------------------------------------------------------------------------------------------------------------------------------------------------------------------------------------------------------------------------------------------------------------------------------------------------------------------------------------------------------------------------------------------------------------------------------------------------------------------------------------------------------------------------------------------------------------------------------------------------------------------------------------------------------------------------------------------------------------------------------------------------------------------------------------------------------------------------------------------------------------------------------------------------------------------------------------------------------------------------------------------------|
| Journal:                      | <i>BMJ Paediatrics Open</i>                                                                                                                                                                                                                                                                                                                                                                                                                                                                                                                                                                                                                                                                                                                                                                                                                                                                                                                                                                                                                                                                                                                                                                                                                                                                                                                                                                                                                                                                                                                                                                                                                               |
| Manuscript ID                 | bmjpo-2019-000465                                                                                                                                                                                                                                                                                                                                                                                                                                                                                                                                                                                                                                                                                                                                                                                                                                                                                                                                                                                                                                                                                                                                                                                                                                                                                                                                                                                                                                                                                                                                                                                                                                         |
| Article Type:                 | Original article                                                                                                                                                                                                                                                                                                                                                                                                                                                                                                                                                                                                                                                                                                                                                                                                                                                                                                                                                                                                                                                                                                                                                                                                                                                                                                                                                                                                                                                                                                                                                                                                                                          |
| Date Submitted by the Author: | 12-Feb-2019                                                                                                                                                                                                                                                                                                                                                                                                                                                                                                                                                                                                                                                                                                                                                                                                                                                                                                                                                                                                                                                                                                                                                                                                                                                                                                                                                                                                                                                                                                                                                                                                                                               |
| Complete List of Authors:     | <p>Adams, Natalie; NIHR Health Protection Research Unit in Gastrointestinal Infections; Public Health England, National Infection Service</p> <p>Byrne, Lisa; Public Health England, National Infection Service</p> <p>Rose, Tanith; NIHR Health Protection Research Unit in Gastrointestinal Infections; University of Liverpool, Department of Public Health and Policy</p> <p>Adak, Bob; NIHR Health Protection Research Unit in Gastrointestinal Infections</p> <p>Jenkins, Claire; Public Health England, National Infection Service; NIHR Health Protection Research Unit in Gastrointestinal Infections</p> <p>Charlett, Andre; Public Health England, National Infection Service</p> <p>Violato, Mara; NIHR Health Protection Research Unit in Gastrointestinal Infections; University of Oxford, Health Economics Research Centre</p> <p>O'Brien, Sarah; NIHR Health Protection Research Unit in Gastrointestinal Infections; University of Liverpool, Department of Public Health and Policy</p> <p>Whitehead, Margaret; NIHR Health Protection Research Unit in Gastrointestinal Infections; University of Liverpool, Department of Public Health and Policy</p> <p>Barr, Benjamin; NIHR Health Protection Research Unit in Gastrointestinal Infections; University of Liverpool, Department of Public Health and Policy</p> <p>Taylor-Robinson, David; NIHR Health Protection Research Unit in Gastrointestinal Infections; University of Liverpool, Department of Public Health and Policy</p> <p>Hawker, Jeremy; NIHR Health Protection Research Unit in Gastrointestinal Infections; Public Health England, National Infection Service</p> |
| Keywords:                     | Epidemiology, Infectious Diseases                                                                                                                                                                                                                                                                                                                                                                                                                                                                                                                                                                                                                                                                                                                                                                                                                                                                                                                                                                                                                                                                                                                                                                                                                                                                                                                                                                                                                                                                                                                                                                                                                         |

SCHOLARONE™  
Manuscripts

1  
2  
3  
4  
5  
6  
7  
8  
9  
10  
11  
12  
13  
14  
15  
16  
17  
18  
19  
20  
21  
22  
23  
24  
25  
26  
27  
28  
29  
30  
31  
32  
33  
34  
35  
36  
37  
38  
39  
40  
41  
42  
43  
44  
45  
46  
47  
48  
49  
50  
51  
52  
53  
54  
55  
56  
57  
58  
59  
60

**Title Page**

**Title:** Sociodemographic and clinical risk-factors for paediatric typical haemolytic uraemic syndrome

**Authors:**

Natalie L. Adams\*<sup>1,2,3</sup>, Lisa Byrne<sup>1,3</sup>, Tanith C. Rose<sup>1,2</sup>, Goutam K. Adak<sup>1</sup>, Claire Jenkins<sup>1,3</sup>, Andre Charlett<sup>3</sup>, Mara Violato<sup>1,4</sup>, Sarah J. O'Brien<sup>1,2</sup>, Margaret Whitehead<sup>1,2</sup>, Benjamin Barr<sup>1,2</sup>, David Taylor-Robinson<sup>1,2±</sup> and Jeremy Hawker<sup>1,3±</sup>

\*Corresponding author

± Joint senior authors

**Affiliations:**

<sup>1</sup>NIHR Health Protection Research Unit in Gastrointestinal Infections, UK

<sup>2</sup>Department of Public Health and Policy, University of Liverpool, UK

<sup>3</sup>National Infection Service, Public Health England, UK

<sup>4</sup>Health Economics Research Centre, University of Oxford, Oxford, UK

**Disclaimers:**

The research was funded by the National Institute for Health Research Health Protection Research Unit (NIHR HPRU) in Gastrointestinal Infections at University of Liverpool in partnership with Public Health England (PHE), in collaboration with University of East Anglia, University of Oxford and the Quadram Institute. Natalie Adams is based at the University of Liverpool and Public Health England. The views expressed are those of the

1  
2  
3 author(s) and not necessarily those of the NHS, the NIHR, the Department of Health or  
4  
5 Public Health England.  
6  
7

8 **Running title:**  
9

10  
11 Paediatric HUS in England 2011-2014  
12  
13

14  
15 **Corresponding author contact information:**  
16

17  
18 Dr Natalie L Adams, Gastrointestinal Infections Department, National Infection Service,  
19  
20 Public Health England, 61 Colindale Ave, Colindale NW9 5EQ, UK  
21

22  
23 [Natalie.Adams@phe.gov.uk](mailto:Natalie.Adams@phe.gov.uk)  
24  
25

26  
27  
28  
29 **Word count (abstract): 243/250**  
30

31  
32 **Word count (text): 2438/2500**  
33  
34

35 **References: 31/40**  
36  
37  
38  
39  
40  
41  
42  
43  
44  
45  
46  
47  
48  
49  
50  
51  
52  
53  
54  
55  
56  
57  
58  
59  
60

## ABSTRACT

### Objectives

Haemolytic Uraemic Syndrome (HUS) following Shiga toxin-producing *Escherichia coli* (STEC) infection is the commonest cause of acute renal failure among children in the United Kingdom. This study explored differential progression from STEC to HUS by social, demographic and clinical risk factors.

### Methods

We undertook a retrospective cohort study linking two datasets. We extracted data on paediatric STEC and HUS cases identified in the Public Health England National Enhanced Surveillance System for STEC and British Paediatric Surveillance Unit HUS surveillance from October 1 2011 to October 31 2014. Using logistic regression, we estimated the odds of HUS progression by risk factors.

### Results

1059 paediatric STEC cases were included in the study, of which 207 (19.55%, 95% CI 17-22%) developed HUS. In the fully-adjusted model, the odds of progression to HUS were highest in those aged 1-4 (OR 4.93, 95% CI 2.30-10.56, compared to 10-15 years), were infected with an stx2-only strain (OR 5.92, 95%CI 2.49-14.10), were prescribed antibiotics (OR 8.46, 95% CI 4.71-15.18), had bloody diarrhoea (OR 3.56, 95%CI 2.04-6.24) or vomiting (OR 4.47, 95%CI 2.62-7.63), but there was no association with progression to HUS by socioeconomic circumstances or rurality.

### Conclusion

1  
2  
3 Combining data from an active clinical surveillance system for HUS with the national  
4 enhanced STEC surveillance system suggests that 20% of diagnosed paediatric STEC  
5  
6 infections in England resulted in HUS No relationship was found with socioeconomic status  
7  
8 or rurality of cases, but differences were demonstrated by age, stx type and presenting  
9  
10 symptoms.  
11  
12  
13  
14  
15  
16  
17  
18

19 **Keywords:** Health inequalities; Shiga-toxin producing *Escherichia coli*; STEC; Haemolytic  
20  
21 Uraemic Syndrome; HUS  
22  
23  
24  
25  
26  
27  
28  
29  
30  
31  
32  
33  
34  
35  
36  
37  
38  
39  
40  
41  
42  
43  
44  
45  
46  
47  
48  
49  
50  
51  
52  
53  
54  
55  
56  
57  
58  
59  
60

## INTRODUCTION

Haemolytic uraemic syndrome (HUS) is a rare but serious complication of infection with Shiga toxin-producing *Escherichia coli* (STEC), affecting the blood, kidneys and, in the most severe cases, the central nervous system. Children and the elderly are considered to be the most susceptible age groups and HUS is recognised as the most common cause of acute renal failure among children in the United Kingdom (1). Strains of STEC encoding *stx2* toxin genes are more often associated with HUS than other strains (1-6).

It is estimated that progression to HUS following STEC infection could be as high as 15% in young children (2, 7). Several studies have suggested that development of HUS varies by some demographic characteristics; higher incidence of HUS has been documented in children (particularly aged 1-4), females (particularly aged over 10 years) and in those of White ethnicity (2, 6, 8-13); however few have documented progression to HUS by other demographic characteristics. This study aims to investigate the relationship between demographic factors, STEC infection and subsequent development of HUS in a well-characterised paediatric population in England with high case-ascertainment.

## METHODS

### *Data, setting and source*

We undertook a retrospective cohort study linking two data sources; the Public Health England (PHE) National Enhanced Surveillance System for STEC (NESSS) and the British Paediatric Surveillance Unit (BPSU) HUS Study in conjunction with PHE. Firstly, we extracted data on STEC cases aged 0-15 years (inclusive) identified in NESSS during the period of the BPSU HUS Study (October 1 2011 to October 31 2014). All laboratory-confirmed STEC cases in England are reported by NHS laboratories to Public Health England staff who collect standardised data through an enhanced surveillance questionnaire



1  
2  
3 (ESQ) as part of their public health response: this standardised dataset is collated centrally in  
4  
5  
6  
7  
8  
9  
10  
11  
12  
13  
14  
15  
16  
17  
18  
19  
20  
21  
22  
23  
24  
25  
26  
27  
28  
29  
30  
31  
32  
33  
34  
35  
36  
37  
38  
39  
40  
41  
42  
43  
44  
45  
46  
47  
48  
49  
50  
51  
52  
53  
54  
55  
56  
57  
58  
59  
60

(ESQ) as part of their public health response: this standardised dataset is collated centrally in  
NESS for further validation and analysis. The ESQ collects detailed information on patient  
demographics, symptoms, food and water exposures and UK and non-UK travel during the  
exposure period (the week prior to illness onset). When a presumptive STEC is identified at  
the local laboratory or a case of HUS is identified, specimens are sent to PHE Gastrointestinal  
Bacteria Reference Unit (GBRU) for testing and patient ESQs are linked to microbiological  
results. This surveillance system is described in detail elsewhere (2).

Secondly, we extracted clinical data on paediatric (<16 years) HUS cases, collected by the  
BPSU HUS Study, an active surveillance system requiring regular returns from clinicians.  
Within this study, data were captured using a standardised questionnaire administered to  
paediatricians collecting information on; case demography; treatment history;  
microbiological investigations; clinical parameters of illness; clinical management of illness  
and status of the case at the time of data capture. Cases in the BPSU dataset were linked on  
National Health Service (NHS) number to those in the NESSS dataset to create a  
retrospective cohort.

For statistical analysis, cases for whom no microbiological information was available (n=4)  
and cases identified via serological testing only (n=66) were excluded in order to assess the  
role of *stx* subtype. Due to missing data for the ethnicity variable (19.1%), we used multiple  
imputation using chained equations to impute values where ethnicity (white/non-white) was  
missing for statistical analysis. Fifty imputed datasets were generated. The distribution of  
ethnicity by age, sex and region was assessed to check the missing at random (MAR)  
assumption. There was no difference in missing ethnicity by sex, however there were some  
differences by age group (57.3% of cases with missing ethnicity were in the 1-4 age group;  
n=114/199) and region (31.2% of cases with missing ethnicity were in London; n=62/199);

1  
2  
3 these were not regarded as problematic however as, given the observed data for other  
4  
5 variables, the missing data were considered independent.  
6  
7

### 8 9 *Ethics*

10  
11 Ethical approval was originally obtained for the main study (Ref: 11/LO/1412). As of  
12  
13 October 2010, HUS is a statutory reportable condition and this study falls under the existing  
14  
15 Health Protection Agency (now Public Health England) permissions under Section 251 of the  
16  
17 NHS Act 2006. In addition, we received a favourable ethical opinion from the South East  
18  
19 Coast - Surrey Research Ethics Committee (15/LO/2138) on 1 December 2015 covering the  
20  
21 use of this dataset for this study.  
22  
23  
24  
25

### 26 27 *Patient involvement*

28  
29 Patients were not directly involved in the design of this study.  
30  
31

### 32 33 *Outcome and exposures*

34  
35 The outcome of interest was HUS, determined by the case meeting the BPSU clinical criteria  
36  
37 (See supplementary Table 1) (14) or completion of the HUS field in the ESQ. Covariates in  
38  
39 the analysis were age group (<1, 1-4, 5-9, 10-15 years); sex (male/female); ethnicity  
40  
41 (White/non-White); travel (yes/no); rurality (rural/urban); microbiology (Shiga-toxin (*Stx*));  
42  
43 antibiotic use (yes/no); clinical symptoms (diarrhoea, bloody diarrhoea, nausea, vomiting,  
44  
45 abdominal pain, fever) and region of residence. The *stx* type, the primary STEC virulence  
46  
47 factor, was used as the main microbiological variable (15). Where symptoms, travel status  
48  
49 and healthcare contact variables were blank or unknown, these were recoded as a negative  
50  
51 response. As a proxy for childhood socioeconomic circumstances (SECs) we used a small-  
52  
53 area deprivation measure, the Index of Multiple Deprivation 2010 (IMD) (16), assigned to  
54  
55  
56  
57  
58  
59  
60

1  
2  
3 each case based on their postcode and divided into population-level quintiles, with the first  
4  
5 quintile representing the least deprived and the fifth quintile representing the most deprived.  
6  
7

### 8 *Analysis strategy*

9  
10  
11 We explored univariate relationships between progression to HUS and the covariates of  
12  
13 interest before fitting a multivariate logistic regression model. All variables were retained in  
14  
15 this model in order to control for any potential confounding. Interaction terms between  
16  
17 variables (IMD, ethnicity, age and sex) were tested to investigate whether the strength of any  
18  
19 relationship was moderated by the inclusion of another variable. Analyses were conducted in  
20  
21 Stata 13.1 (Statacorp, Texas).  
22  
23  
24  
25

### 26 *Robustness tests*

27  
28  
29 We performed multiple sensitivity analyses to test the validity of the main analysis; first by  
30  
31 (i) excluding cases that were likely to have a travel-acquired STEC infection (date of onset is  
32  
33 within one exposure period, 7 days, of having returned from outside of the UK) and (ii)  
34  
35 separately excluding cases with unknown ethnicity to determine whether there were  
36  
37 differences in progression to HUS by SECs for children who travelled abroad during their  
38  
39 incubation period compared to those who did not or those with ethnicity recorded and those  
40  
41 without respectively. Further, to explore the relationship between age and sex in this cohort,  
42  
43 we fitted a fractional polynomial prediction plot to detect the best functional form for age (as  
44  
45 a continuous variable) and sex by HUS. A likelihood ratio test was performed to best fit.  
46  
47  
48  
49

50  
51 To further explore potential issues of multicollinearity between IMD and ethnicity a post-hoc  
52  
53 matched analysis on ethnicity using conditional logistic regression and penalised logistic  
54  
55 regression on the multiply imputed dataset were conducted. The post-hoc matched analysis  
56  
57  
58  
59  
60

was conducted on a smaller number of variables in order to provide the simplest but most complete model possible.

## RESULTS

### *Descriptive analysis*

Of 1059 paediatric STEC cases included in the study, 207 (19.55%, 95% CI 17.27%-22.04%) developed HUS. Progression to HUS varied by age and gender (Table 1), the highest was observed in females aged 1-4 years (26.0%). A higher proportion of progression to HUS was observed in females aged 10-15 years compared to males of the same age (19.3%, 95% CI 12.3-27.9 versus 7.1%, 95% CI 2.9-14.2,  $p=0.01$ ), and amongst females aged less than 1 year compared to males of the same age, although this was not significant (14.3%, 95% CI 4.0-32.7 versus 4.8%, 95% CI 0.6-16.2,  $p=0.16$ ). Although progression to HUS was higher in the least disadvantaged quintile (47/245, 19.2%, 95% CI 14.4-24.7) compared with the most disadvantaged quintile (29/189, 15.3%, 95% CI 10.5-21.3) this difference was not statistically significant ( $p=0.29$ ) and there was no clear pattern across the 5 quintiles ( $p=0.07$ ), with the highest proportion progressing to HUS in quintile 3.

### *Multivariable analysis*

In the fully adjusted model (Table 2), there were significantly lower odds of HUS amongst <1, 5-9 and 10-15 year olds compared to 1-4 year olds and significantly higher odds of HUS amongst those infected with *stx2*-only strains, those prescribed antibiotics and among those who had experienced bloody diarrhoea or vomiting. The most disadvantaged children had lower odds of progression to HUS compared to the least disadvantaged children (OR 0.57, 95% CI 0.25-1.31) but the difference was not significant. There was no statistically

1  
2  
3 significant difference in risk by rurality or by region. There were no significant interactions  
4  
5 identified (data not shown).  
6  
7

8 The multiple sensitivity analyses conducted to assess the robustness of the findings did not  
9  
10 alter the overall conclusions of this research (Supplementary Tables 2-5).  
11  
12

## 13 **DISCUSSION**

14  
15  
16  
17 In a novel linkage and analysis of two datasets with high case-ascertainment to explore the  
18  
19 role of demographic and socioeconomic factors in the development of HUS following STEC  
20  
21 infection, we found progression from STEC infection to HUS to be 20% in this paediatric  
22  
23 cohort in England. Odds of HUS progression varied by age, stx type, antibiotic exposure and  
24  
25 clinical presentation, with children aged 1-4 years infected with stx2-only, with reported  
26  
27 antibiotic exposure and presenting with bloody diarrhoea or vomiting at highest risk. Few  
28  
29 studies have explored the social patterning of risk factors for STEC (17) or the socio-  
30  
31 demographic risk factors associated with progression to HUS, and no such studies have been  
32  
33 undertaken in England. We found no relationship between progression to HUS and  
34  
35 socioeconomic status in children in this study.  
36  
37  
38  
39  
40

41 Our study has several strengths. This study captures the progression of HUS in a well-  
42  
43 characterised paediatric STEC population. To the best of our knowledge, as confirmed by a  
44  
45 prior review of the literature and discussion with national experts, this is the first study to  
46  
47 combine a prospective active surveillance system and a multisource national surveillance  
48  
49 system to study the risk factors for HUS and as such is likely to have better case-  
50  
51 ascertainment of HUS than previous studies and is related to good STEC denominators.  
52  
53 Furthermore, this study makes use of one of the largest cohorts of HUS cases. The results of  
54  
55 this study are likely to be generalisable to other high-income countries with a similar pattern  
56  
57 of STEC infection. Despite this, there are some limitations. It is possible that there is residual  
58  
59  
60

1  
2  
3 confounding that could not be controlled for, such as intrinsic childhood characteristics which  
4 may increase differential vulnerability or susceptibility by SEC such as genetic  
5  
6 predisposition, co-morbidities, and clinical or treatment characteristics. Further, as an area-  
7  
8 level measure of SEC was used, it is possible that it may not have been sensitive enough to  
9  
10 detect the effect of socioeconomic inequalities, particularly if individual factors rather than  
11  
12 area-level factors have more influence over the risk of acquiring more severe strains of STEC  
13  
14 with increased risk of progression to HUS. However, person-to-person spread is an important  
15  
16 risk factor for GI infections and therefore community or area-level risk would be an  
17  
18 important factor in considering individual risk of infection. Excluding individuals with a  
19  
20 serological result only from the statistical analysis may introduce a potential bias leading to  
21  
22 an underestimate of HUS incidence, which may be important if there are geographical or  
23  
24 host-factors which are linked to severity of illness, although the number of serology-only  
25  
26 diagnoses was small. In England, most diagnosed cases of STEC are of serogroup O157, and  
27  
28 may therefore not be directly applicable to countries where other, possibly less pathogenic,  
29  
30 serogroups predominate. It is possible however, that the risk of progression to HUS could be  
31  
32 different in populations exposed to STEC organisms with a lower proportion of stx2-only  
33  
34 producing strains, or with a different age distribution of cases. Finally, it was not always  
35  
36 possible to determine whether antibiotics had been prescribed during treatment for STEC  
37  
38 infection or following a diagnosis of HUS therefore the relevant association should be  
39  
40 interpreted with caution.  
41  
42  
43  
44  
45  
46  
47  
48  
49

50 The finding of 19.5% (95% CI 17-22%) of diagnosed STEC cases progressing to HUS is  
51  
52 higher than previous studies, which have estimated the proportion of paediatric cases of  
53  
54 STEC O157 progressing to HUS to be 15% (95% CI 11-19%) in females aged 1-4 years in  
55  
56 England (2) and 15.3% (95% CI 13-18%) in children aged <5 years in the USA (7). Our  
57  
58 study uses data derived from two linked surveillance systems providing high ascertainment of  
59  
60

1  
2  
3 both STEC and HUS cases which provides a more robust estimate. It is likely that there will  
4  
5 also be a bias resulting from ascertainment of STEC cases from laboratory specimens, as  
6  
7 milder cases of gastrointestinal infection are less likely to be microbiologically tested, but this  
8  
9 will also be true of previous published studies.  
10  
11

12  
13 Whilst rurality has been reported as an important factor in risk for STEC infection (2, 19), our  
14  
15 study suggests that rurality is not a significant driver of progression to HUS. Similarly,  
16  
17 despite evidence to suggest that the risk and consequences of GI infections in general are  
18  
19 greater for disadvantaged children (20-24) – the finding in our study suggests that lower  
20  
21 childhood SEC is unlikely to be a contributor for development of HUS.  
22  
23

24  
25 Previous studies in England have suggested that children aged 1-4 years, females and white  
26  
27 ethnic groups have the highest incidence of STEC infection (2, 25). Our study echoes the  
28  
29 findings by Milford et al (6) which demonstrated higher progression to HUS amongst  
30  
31 children aged 1-4 years. No overall difference in risk of HUS by sex was identified in our  
32  
33 study, a finding echoed in several other previous studies (26-29); this is an area of  
34  
35 disagreement in the literature with several studies finding higher risk amongst women (7, 30,  
36  
37 31) although two of these studies finding higher risk in women did not look specifically  
38  
39 amongst children (7, 31). We did find differences in risk by sex within specific age groups,  
40  
41 with a greater proportion of progression to HUS amongst girls less than 1 year of age and 10-  
42  
43 15 years of age compared to boys of the same age groups (Table 1), although no significant  
44  
45 interaction between age and sex could be identified. The reasons for the differential risk by  
46  
47 age are currently unclear and call for a deeper understanding of differences in risks and  
48  
49 exposures between these groups.  
50  
51  
52  
53

54  
55  
56 The association between clinical presentation with vomiting and bloody diarrhoea and  
57  
58 increased risk of HUS reported in this study has been identified previously (12) and, as such,  
59  
60

1  
2  
3 the presence of these symptoms particularly in paediatric STEC cases should evoke a high  
4  
5 level of clinical suspicion for the potential development of HUS.  
6  
7

8  
9 Our study quantifies the proportion of paediatric STEC cases progressing to HUS in a well –  
10  
11 defined population with high ascertainment. It also quantifies the risk factors associated with  
12  
13 progression to HUS in terms of sociodemographic characteristics as well as clinical  
14  
15 presentation. Further research is warranted to elucidate the populations at risk of STEC  
16  
17 infection and HUS in terms of deprivation, ethnicity, age and sex, in order to better  
18  
19 understand whether there are real differences in risk or artefacts of surveillance.  
20  
21  
22

## 23 **FUNDING**

24  
25  
26 The research was funded by the National Institute for Health Research Health Protection  
27  
28 Research Unit (NIHR HPRU) in Gastrointestinal Infections [grant number NIHR HPRU  
29  
30 201210,038] at University of Liverpool in partnership with Public Health England (PHE), in  
31  
32 collaboration with University of East Anglia, University of Oxford and the Quadram  
33  
34 Institute. Natalie Adams is based at the University of Liverpool and Public Health England.  
35  
36 The views expressed are those of the author(s) and not necessarily those of the NHS, the  
37  
38 NIHR, the Department of Health and Social Care or Public Health England. David Taylor-  
39  
40 Robinson is funded by the MRC on a Clinician Scientist Fellowship (MR/P008577/1). Ben  
41  
42 Barr and Tanith Rose were also supported by the National Institute for Health Research  
43  
44 (NIHR) Collaboration for Leadership in Health Research and Care (CLAHRC NWC).  
45  
46  
47  
48  
49

## 50 **CONFLICT OF INTEREST**

51  
52  
53 All authors: No potential conflicts of interest.  
54  
55

## 56 **ACKNOWLEDGMENTS**



1  
2  
3 This work was funded by the National Institute for Health Research Health Protection  
4  
5 Research Unit in Gastrointestinal Infections. The authors would like to thank Kirsten Glen  
6  
7 and Naomi Launders for their work on the National Enhanced Surveillance System for STEC,  
8  
9  
10 Ross Harris for statistical advice and Richard Lynn at the British Paediatric Surveillance Unit  
11  
12 for facilitating the BPSU HUS study.  
13  
14

### 15 **CONFLICT OF INTEREST**

16  
17  
18 The authors declare that they have no conflicts of interest.  
19  
20  
21  
22  
23  
24  
25  
26  
27  
28  
29  
30  
31  
32  
33  
34  
35  
36  
37  
38  
39  
40  
41  
42  
43  
44  
45  
46  
47  
48  
49  
50  
51  
52  
53  
54  
55  
56  
57  
58  
59  
60

Confidential: For Review Only

### WHAT IS ALREADY KNOWN ON THIS TOPIC

- HUS is recognised as the most common cause of acute renal failure among children in the United Kingdom.
- It is estimated that progression to HUS following STEC infection could be as high as 15% in young children.
- Several studies have suggested that development of HUS varies by demographic characteristics however few have documented progression to HUS by demographic characteristics.

### WHAT THIS STUDY ADDS

- This is a large paediatric cohort including reliable health outcome measures.
- A fifth of paediatric STEC cases developed the serious complication of haemolytic uraemic syndrome in England.
- This figure is higher than previously reported in England, and varied by demographic and clinical, but not socioeconomic, factors.

## REFERENCES

1. Lynn RM, O'Brien SJ, Taylor CM, et al. Childhood hemolytic uremic syndrome, United Kingdom and Ireland. *Emerging Infectious Diseases*. 2005;11(4):590-6. doi:10.3201/eid1104.040833
2. Byrne L, Jenkins C, Launders N, Elson R, Adak GK. The epidemiology, microbiology and clinical impact of Shiga toxin-producing *Escherichia coli* in England, 2009-2012. *Epidemiology and Infection*. 2015;1-13. doi:10.1017/S0950268815000746
3. Ethelberg S, Olsen KE, Scheutz F, et al. Virulence factors for hemolytic uremic syndrome, Denmark. *Emerging Infectious Diseases*. 2004;10(5):842-7. doi:10.3201/eid1005.030576
4. Persson S, Olsen KE, Ethelberg S, Scheutz F. Subtyping method for *Escherichia coli* shiga toxin (verocytotoxin) 2 variants and correlations to clinical manifestations. *J Clin Microbiol*. 2007;45(6):2020-4. doi:10.1128/JCM.02591-06
5. Dallman TJ, Ashton PM, Byrne L, et al. Applying phylogenomics to understand the emergence of Shiga-toxin-producing *Escherichia coli* O157:H7 strains causing severe human disease in the UK. *Microbial Genomics*. 2015;1(3). doi:doi:10.1099/mgen.0.000029
6. Milford DV, Taylor CM, Guttridge B, Hall SM, Rowe B, Kleanthous H. Haemolytic uraemic syndromes in the British Isles 1985-8: association with verocytotoxin producing *Escherichia coli*. Part 1: Clinical and epidemiological aspects. *Archives of Disease in Childhood*. 1990;65(7):716-21.
7. Gould LH, Demma L, Jones TF, et al. Hemolytic uremic syndrome and death in persons with *Escherichia coli* O157:H7 infection, foodborne diseases active surveillance network sites, 2000-2006. *Clinical Infectious Diseases*. 2009;49(10):1480-5. doi:10.1086/644621
8. Kinney JS, Gross TP, Porter CC, Rogers MF, Schonberger LB, Hurwitz ES. Hemolytic-uremic syndrome: a population-based study in Washington, DC and Baltimore, Maryland. *American Journal of Public Health*. 1988;78(1):64-5.
9. Rogers MF, Rutherford GW, Alexander SR, et al. A population-based study of hemolytic-uremic syndrome in Oregon, 1979-1982. *American Journal of Epidemiology*. 1986;123(1):137-42.
10. Tarr PI, Hickman RO. Hemolytic uremic syndrome epidemiology: a population-based study in King County, Washington, 1971 to 1980. *Pediatrics*. 1987;80(1):41-5.
11. Bell WR. Thrombotic thrombocytopenic purpura/hemolytic uremic syndrome relapse: frequency, pathogenesis, and meaning. *Seminars in hematology*. 1997;34(2):134-9.
12. Launders N, Byrne L, Jenkins C, Harker K, Charlett A, Adak GK. Disease severity of Shiga toxin-producing *E. coli* O157 and factors influencing the development of typical haemolytic uraemic syndrome: a retrospective cohort study, 2009-2012. *BMJ open*. 2016;6(1). doi:10.1136/bmjopen-2015-009933
13. Elliott EJ, Robins-Browne RM, O'Loughlin EV, et al. Nationwide study of haemolytic uraemic syndrome: clinical, microbiological, and epidemiological features. *Arch Dis Child*. 2001;85:125-31.
14. Byrne L, on behalf of the BPSU HUS Study Team,. BPSU HUS Study Report. 2017.
15. Ethelberg S, Olsen KE, Scheutz F, et al. Virulence factors for hemolytic uremic syndrome, Denmark. *Emerg Infect Dis*. 2004;10(5):842-7. doi:10.3201/eid1005.030576
16. Department for Communities and Local Government. English Indices of Deprivation 2010. Department for Communities and Local Government. 2011. [https://www.gov.uk/government/uploads/system/uploads/attachment\\_data/file/6871/1871208.pdf](https://www.gov.uk/government/uploads/system/uploads/attachment_data/file/6871/1871208.pdf). Accessed 16/09/2016.

17. Bentancor AB, Ameal LA, Calvino MF, Martinez MC, Miccio L, Degregorio OJ. Risk factors for Shiga toxin-producing *Escherichia coli* infections in preadolescent schoolchildren in Buenos Aires, Argentina. *Journal of Infection in Developing Countries*. 2012;6(5):378-86.
18. Byrne L, Vanstone GL, Perry NT, et al. Epidemiology and microbiology of Shiga toxin-producing *Escherichia coli* other than serogroup O157 in England, 2009-2013. *Journal of medical microbiology*. 2014;63(Pt 9):1181-8. doi:10.1099/jmm.0.075895-0
19. Chang M, Groseclose SL, Zaidi AA, Braden CR. An ecological analysis of sociodemographic factors associated with the incidence of salmonellosis, shigellosis, and *E. coli* O157:H7 infections in US counties. *Epidemiology and Infection*. 2009;137(6):810-20. doi:10.1017/S0950268808001477
20. Olowokure B, Hawker J, Weinberg J, Gill N, Sufi F. Deprivation and hospital admission for infectious intestinal diseases. *Lancet*. 1999;353(9155):807-8. doi:10.1016/S0140-6736(99)00611-X
21. Phillips G, Tam CC, Rodrigues LC, Lopman B. Risk factors for symptomatic and asymptomatic norovirus infection in the community. *Epidemiology and Infection*. 2011;139(11):1676-86. doi:<http://dx.doi.org/10.1017/S0950268810002839>
22. Pockett RD, Adlard N, Carroll S, Rajoriya F. Paediatric hospital admissions for rotavirus gastroenteritis and infectious gastroenteritis of all causes in England: an analysis of correlation with deprivation. *Current medical research and opinion*. 2011;27(4):777-84. doi:10.1185/03007995.2011.555757
23. Rose TC, Adams NL, Barr B, et al. Socioeconomic status is associated with symptom severity and sickness absence in people with infectious intestinal disease in the UK. *BMC Infect Dis*. 2017;17(1):447. doi:10.1186/s12879-017-2551-1
24. Adams NL, Rose TC, Hawker J, et al. Relationship between socioeconomic status and gastrointestinal infections in developed countries: A systematic review and meta-analysis. *PloS one*. 2018;13(1):e0191633. doi:10.1371/journal.pone.0191633
25. Adams NL, Byrne L, Smith GA, et al. Shiga Toxin-Producing *Escherichia coli* O157, England and Wales, 1983-2012. *Emerging Infectious Diseases*. 2016;22(4):590-7. doi:10.3201/eid2204.151485
26. Tserenpuntsag B, Chang H-G, Smith PF, Morse DL. Hemolytic uremic syndrome risk and *Escherichia coli* O157:H7. *Emerging Infectious Diseases*. 2005;11(12):1955-7.
27. Bell BP, Griffin PM, Lozano P, Christie DL, Kobayashi JM, Tarr PI. Predictors of hemolytic uremic syndrome in children during a large outbreak of *Escherichia coli* O157:H7 infections. *Pediatrics*. 1997;100(1):E12.
28. Rowe PC, Orrbine E, Lior H, et al. Risk of hemolytic uremic syndrome after sporadic *Escherichia coli* O157:H7 infection: results of a Canadian collaborative study. Investigators of the Canadian Pediatric Kidney Disease Research Center. *Journal of Pediatrics*. 1998;132(5):777-82.
29. Cimolai N, Basalyga S, Mah DG, Morrison BJ, Carter JE. A continuing assessment of risk factors for the development of *Escherichia coli* O157:H7-associated hemolytic uremic syndrome. *Clinical Nephrology*. 1994;42(2):85-9.
30. Rowe PC, Orrbine E, Wells GA, McLaine PN. Epidemiology of hemolytic-uremic syndrome in Canadian children from 1986 to 1988. The Canadian Pediatric Kidney Disease Reference Centre. *Journal of Pediatrics*. 1991;119(2):218-24.
31. Chang H-GH, Tserenpuntsag B, Kacica M, Smith PF, Morse DL. Hemolytic uremic syndrome incidence in New York. *Emerging Infectious Diseases*. 2004;10(5):928-31.

## TABLES

Table 1: Characteristics of cohort participants by HUS status (n=1,059)

|                     |                         | No HUS<br>n (%) | HUS<br>n (%) |
|---------------------|-------------------------|-----------------|--------------|
| <b>Total</b>        |                         | 852 (80.5)      | 207 (19.6)   |
| <b>Age group</b>    | <1                      | 64 (91.4)       | 6 (8.6)      |
|                     | 1-4                     | 370 (76.1)      | 116 (23.9)   |
|                     | 5-9                     | 239 (80.7)      | 57 (19.3)    |
|                     | 10-15                   | 179 (86.5)      | 28 (13.5)    |
| <b>Sex</b>          | Female                  | 400 (77.5)      | 116 (22.5)   |
|                     | Male                    | 452 (83.2)      | 91 (16.8)    |
| <b>Age and Sex</b>  | Female <1               | 24 (85.7)       | 4 (14.3)     |
|                     | Female 1-4              | 171 (74.0)      | 60 (26.0)    |
|                     | Female 5-9              | 117 (79.1)      | 31 (20.9)    |
|                     | Female 10-15            | 88 (80.7)       | 21 (19.3)    |
|                     | Male <1                 | 40 (95.2)       | 2 (4.8)      |
|                     | Male 1-4                | 199 (78.0)      | 56 (22.0)    |
|                     | Male 5-9                | 122 (82.4)      | 26 (17.6)    |
|                     | Male 10-15              | 91 (92.9)       | 7 (7.1)      |
| <b>Ethnicity</b>    | White                   | 552 (80.5)      | 134 (19.5)   |
|                     | Non-white               | 138 (88.5)      | 18 (11.5)    |
|                     | Unknown                 | 162 (74.7)      | 55 (23.4)    |
| <b>IMD Quintile</b> | 1 (Least Disadvantaged) | 198 (80.8)      | 47 (19.2)    |
|                     | 2                       | 186 (84.2)      | 35 (15.8)    |
|                     | 3                       | 166 (75.8)      | 53 (24.2)    |
|                     | 4                       | 142 (76.8)      | 43 (23.2)    |
|                     | 5 (Most Disadvantaged)  | 160 (84.7)      | 29 (15.3)    |
| <b>Travel</b>       | Yes                     | 128 (85.3)      | 22 (14.7)    |
|                     | No                      | 724 (79.7)      | 185 (20.4)   |
| <b>Rurality</b>     | Rural                   | 230 (80.4)      | 56 (19.6)    |
|                     | Urban                   | 622 (80.5)      | 151 (19.5)   |
| <b>Region</b>       | East Midlands           | 65 (81.3)       | 15 (18.8)    |
|                     | East of England         | 57 (80.3)       | 14 (19.7)    |
|                     | London                  | 93 (81.6)       | 21 (18.4)    |
|                     | North East              | 64 (77.1)       | 19 (22.9)    |
|                     | North West              | 153 (77.7)      | 44 (22.3)    |
|                     | South East              | 92 (78.6)       | 25 (21.4)    |
|                     | South West              | 101 (75.9)      | 32 (24.1)    |
|                     | West Midlands           | 96 (84.2)       | 18 (15.8)    |
|                     | Yorkshire and Humber    | 131 (87.3)      | 19 (12.7)    |
| <b>Stx</b>          | Stx1                    | 17 (94.4)       | 1 (5.6)      |
|                     | Stx2                    | 609 (81.7)      | 136 (18.3)   |
|                     | Stx1+2                  | 219 (96.9)      | 7 (3.1)      |
|                     | Serology                | 7 (10.6)        | 59 (89.4)    |
|                     | Unknown                 | 0 (0.0)         | 4 (100.0)    |
| <b>Symptoms</b>     | Diarrhoea               | 803 (80.3)      | 197 (19.7)   |
|                     | Bloody diarrhoea        | 432 (74.0)      | 152 (26.0)   |
|                     | Nausea                  | 278 (75.8)      | 89 (24.3)    |
|                     | Vomiting                | 330 (66.1)      | 169 (33.9)   |
|                     | Abdominal pain          | 574 (78.2)      | 160 (21.8)   |

|                           |                          |            |            |
|---------------------------|--------------------------|------------|------------|
|                           | Fever                    | 273 (76.7) | 83 (23.3)  |
| <b>Healthcare contact</b> | Antibiotics              | 53 (40.8)  | 77 (59.2)  |
|                           | NHS Direct               | 67 (72.0)  | 26 (28.0)  |
|                           | GP                       | 570 (83.7) | 111 (16.3) |
|                           | A&E                      | 186 (66.9) | 92 (33.1)  |
|                           | Other healthcare contact | 98 (74.8)  | 33 (25.2)  |
|                           | Hospital                 | 223 (52.4) | 203 (47.6) |

---

HUS – haemolytic uraemic syndrome; *stx* – Shiga toxin; NHS Direct – National Health Service telephone advice line, now NHS 111; GP – General Practitioner; A&E – accident and emergency

---

Confidential: For Review Only

Table 2: Adjusted and unadjusted regression analysis (n=989)

| Variable                     | Category                | n (%)      | Unadjusted      |              | Adjusted <sup>a</sup> |                     | p value          |
|------------------------------|-------------------------|------------|-----------------|--------------|-----------------------|---------------------|------------------|
|                              |                         |            | Odds Ratio      | (95% CI)     | Odds Ratio            | (95% CI)            |                  |
| <b>Age group</b>             | <1                      | 67 (6.8)   | 0.19            | (0.06-0.62)  | <b>0.21</b>           | <b>(0.05-0.82)</b>  | <b>0.03</b>      |
|                              | 1-4                     | 456 (46.1) | 1.0 (reference) |              | 1.0 (reference)       |                     |                  |
|                              | 5-9                     | 274 (27.7) | 0.62            | (0.40-0.94)  | <b>0.43</b>           | <b>(0.25-0.74)</b>  | <b>0.002</b>     |
|                              | 10-15                   | 192 (19.4) | 0.34            | (0.19-0.61)  | <b>0.20</b>           | <b>(0.09-0.43)</b>  | <b>&lt;0.001</b> |
| <b>Sex</b>                   | Male                    | 513 (51.9) | 1.0 (reference) |              | 1.0 (reference)       |                     |                  |
|                              | Female                  | 476 (48.1) | 1.37            | (0.96-1.96)  | 1.38                  | (0.88-2.14)         | 0.16             |
| <b>Ethnicity<sup>‡</sup></b> | White                   | 797 (80.6) | 1.0 (reference) |              | 1.0 (reference)       |                     |                  |
|                              | Non-White               | 192 (19.4) | 0.39            | (0.18-0.81)  | <b>0.28</b>           | <b>(0.11-0.74)</b>  | <b>0.01</b>      |
| <b>Travel</b>                | No                      | 850 (86.0) | 1.0 (reference) |              | 1.0 (reference)       |                     |                  |
|                              | Yes                     | 139 (14.0) | 0.46            | (0.24-0.88)  | 0.64                  | (0.28-1.45)         | 0.28             |
| <b>Rurality</b>              | Urban                   | 719 (72.7) | 1.0 (reference) |              | 1.0 (reference)       |                     |                  |
|                              | Rural                   | 270 (27.3) | 1.21            | (0.82-1.77)  | 0.88                  | (0.52-1.48)         | 0.63             |
| <b>IMD Quintile</b>          | 1 (least disadvantaged) | 231 (23.4) | 1.0 (reference) |              | 1.0 (reference)       |                     |                  |
|                              | 2                       | 210 (21.2) | 0.83            | (0.48-1.42)  | 0.64                  | (0.32-1.27)         | 0.20             |
|                              | 3                       | 204 (20.6) | 1.28            | (0.77-2.12)  | 1.01                  | (0.54-1.91)         | 0.97             |
|                              | 4                       | 170 (17.2) | 1.10            | (0.64-1.90)  | 1.10                  | (0.54-2.26)         | 0.79             |
|                              | 5 (most disadvantaged)  | 174 (17.6) | 0.57            | (0.30-1.06)  | 0.57                  | (0.25-1.31)         | 0.18             |
| <b>Region</b>                | East Midlands           | 72 (7.3)   | 0.62            | (0.24-1.59)  | 0.59                  | (0.18-1.92)         | 0.39             |
|                              | East of England         | 66 (6.7)   | 1.03            | (0.44-2.42)  | 1.12                  | (0.37-3.37)         | 0.84             |
|                              | London                  | 108 (10.9) | 1.0 (reference) |              | 1.0 (reference)       |                     |                  |
|                              | North East              | 76 (7.7)   | 1.19            | (0.53-2.64)  | 0.71                  | (0.26-1.97)         | 0.51             |
|                              | North West              | 185 (18.7) | 1.20            | (0.63-2.31)  | 1.02                  | (0.44-2.37)         | 0.97             |
|                              | South East              | 107 (10.8) | 1.09            | (0.52-2.28)  | 1.31                  | (0.48-3.63)         | 0.60             |
|                              | South West              | 127 (12.8) | 1.48            | (0.75-2.93)  | 1.25                  | (0.50-3.13)         | 0.63             |
|                              | West Midlands           | 104 (10.5) | 0.54            | (0.23-1.29)  | 0.53                  | (0.18-1.53)         | 0.24             |
|                              | Yorkshire and Humber    | 144 (14.6) | 0.62            | (0.29-1.33)  | 0.52                  | (0.20-1.34)         | 0.17             |
| <b>Stx</b>                   | Stx1+2                  | 226 (22.9) | 1.0 (reference) |              | 1.0 (reference)       |                     |                  |
|                              | Stx1                    | 18 (1.8)   | 1.84            | (0.21-15.84) | 5.53                  | (0.53-57.42)        | 0.15             |
|                              | Stx2                    | 745 (75.3) | 6.99            | (3.22-15.17) | <b>5.92</b>           | <b>(2.49-14.10)</b> | <b>&lt;0.001</b> |
| <b>Antibiotics</b>           | No                      | 887 (89.7) | 1.0 (reference) |              | 1.0 (reference)       |                     |                  |
|                              | Yes                     | 102 (10.3) | 8.54            | (5.48-13.30) | <b>8.46</b>           | <b>(4.71-15.18)</b> | <b>&lt;0.001</b> |

|                         |     |            |                 |              |                 |                    |                  |
|-------------------------|-----|------------|-----------------|--------------|-----------------|--------------------|------------------|
| <b>Diarrhoea</b>        | No  | 49 (5.0)   | 1.0 (reference) |              | 1.0 (reference) |                    |                  |
|                         | Yes | 940 (95.0) | 8.61            | (1.18-62.89) | 4.04            | (0.50-32.59)       | 0.19             |
| <b>Bloody diarrhoea</b> | No  | 440 (44.5) | 1.0 (reference) |              | 1.0 (reference) |                    |                  |
|                         | Yes | 549 (55.5) | 4.85            | (3.07-8.00)  | <b>3.56</b>     | <b>(2.04-6.24)</b> | <b>&lt;0.001</b> |
| <b>Nausea</b>           | No  | 653 (66.0) | 1.0 (reference) |              | 1.0 (reference) |                    |                  |
|                         | Yes | 336 (34.0) | 1.52            | (1.06-2.18)  | 1.12            | (0.67-1.86)        | 0.66             |
| <b>Vomiting</b>         | No  | 549 (55.5) | 1.0 (reference) |              | 1.0 (reference) |                    |                  |
|                         | Yes | 440 (44.5) | 6.05            | (3.95-9.26)  | <b>4.47</b>     | <b>(2.62-7.63)</b> | <b>&lt;0.001</b> |
| <b>Abdominal pain</b>   | No  | 309 (31.2) | 1.0 (reference) |              | 1.0 (reference) |                    |                  |
|                         | Yes | 680 (68.8) | 1.49            | (0.99-2.25)  | 0.82            | (0.46-1.46)        | 0.50             |
| <b>Fever</b>            | No  | 657 (66.4) | 1.0 (reference) |              | 1.0 (reference) |                    |                  |
|                         | Yes | 332 (33.6) | 1.50            | (1.05-2.16)  | 1.05            | (0.67-1.66)        | 0.82             |

<sup>a</sup>Adjusted for all other covariates in the model; *stx* – Shiga toxin gene; <sup>#</sup>Multiply imputed variable



1  
2  
3 **SUPPLEMENTARY DATA**  
4

5 Supplementary Table 1a: Clinical case definition for HUS  
6

7 A child (aged <16 years of age) who has:

8 Acute kidney injury (AKI) defined by oligoanuria and/or elevated creatinine for age  
9

10 AND

11  
12 Microangiopathic haemolytic anaemia (MAHA) defined by haemoglobin level <10 g/L with  
13 fragmented erythrocytes  
14

15 AND/OR

16 Thrombocytopenia defined by a platelet count of <130,000 × 10<sup>9</sup>/L  
17

18 WITHOUT septicaemia, malignant hypertension, chronic uraemia, or primary vascular disease  
19

20 Elevated creatinine levels differed by age group and were those above the thresholds in Table 1  
21  
22  
23  
24

25  
26 Supplementary Table 1b: Creatinine level (micromol/L) thresholds by age group  
27

| Age Group   | Normal Creatinine threshold (micromol/L) |
|-------------|------------------------------------------|
| 0-7 days    | 100                                      |
| 8-14 days   | 80                                       |
| 15-28 days  | 55                                       |
| 1m-3 years  | 40                                       |
| 4-6 years   | 46                                       |
| 7-9 years   | 56                                       |
| 10-12 years | 60                                       |
| 13-15 years | 80                                       |

28  
29  
30  
31  
32  
33  
34  
35  
36  
37  
38  
39  
40  
41  
42  
43  
44  
45  
46  
47  
48  
49  
50  
51  
52  
53  
54  
55  
56  
57  
58  
59  
60

Supplementary Table 2: Adjusted and unadjusted regression analysis - Sensitivity analysis excluding travel cases (n subjects=850)

| Variable     | Category                | n (%)      | Unadjusted      |              | Adjusted <sup>a</sup> |                      | p value          |
|--------------|-------------------------|------------|-----------------|--------------|-----------------------|----------------------|------------------|
|              |                         |            | Odds Ratio      | (95% CI)     | Odds Ratio            | (95% CI)             |                  |
| Age group    | <1                      | 55 (6.5)   | 0.14            | (0.03-0.59)  | <b>0.12</b>           | <b>(0.02-0.62)</b>   | <b>0.01</b>      |
|              | 1-4                     | 400 (47.1) | 1.0 (reference) |              | 1.0 (reference)       |                      |                  |
|              | 5-9                     | 242 (28.5) | 0.61            | (0.39-0.94)  | <b>0.45</b>           | <b>(0.25-0.79)</b>   | <b>0.005</b>     |
|              | 10-15                   | 153 (18.0) | 0.32            | (0.17-0.60)  | <b>0.17</b>           | <b>(0.07-0.39)</b>   | <b>&lt;0.001</b> |
| Sex          | Male                    | 445 (52.4) | 1.0 (reference) |              | 1.0 (reference)       |                      |                  |
|              | Female                  | 405 (47.7) | 1.31            | (0.91-1.90)  | 1.30                  | (0.81-2.08)          | 0.27             |
| Ethnicity    | White                   | 700 (82.4) | 1.0 (reference) |              | 1.0 (reference)       |                      |                  |
|              | Non-White               | 150 (17.6) | 0.41            | (0.20-0.83)  | <b>0.27</b>           | <b>(0.10-0.73)</b>   | <b>0.01</b>      |
| Rurality     | Urban                   | 606 (71.3) | 1.0 (reference) |              | 1.0 (reference)       |                      |                  |
|              | Rural                   | 244 (28.7) | 1.28            | (0.86-1.90)  | 1.07                  | (0.62-1.86)          | 0.80             |
| IMD Quintile | 1 (least disadvantaged) | 196 (23.1) | 1.0 (reference) |              | 1.0 (reference)       |                      |                  |
|              | 2                       | 184 (21.7) | 0.88            | (0.50-1.54)  | 0.75                  | (0.36-1.53)          | 0.43             |
|              | 3                       | 180 (21.2) | 1.24            | (0.73-2.10)  | 1.06                  | (0.54-2.10)          | 0.86             |
|              | 4                       | 150 (17.7) | 1.07            | (0.61-1.90)  | 1.14                  | (0.53-2.46)          | 0.74             |
|              | 5 (most disadvantaged)  | 140 (16.5) | 0.52            | (0.26-1.04)  | 0.57                  | (0.23-1.43)          | 0.23             |
| Region       | East Midlands           | 61 (7.2)   | 0.54            | (0.19-1.49)  | 0.49                  | (0.14-1.80)          | 0.29             |
|              | East of England         | 55 (6.5)   | 0.84            | (0.33-2.16)  | 1.02                  | (0.30-3.44)          | 0.98             |
|              | London                  | 83 (9.8)   | 1.0 (reference) |              | 1.0 (reference)       |                      |                  |
|              | North East              | 71 (8.4)   | 0.90            | (0.38-2.14)  | 0.59                  | (0.19-1.81)          | 0.35             |
|              | North West              | 172 (20.2) | 1.13            | (0.56-2.25)  | 1.06                  | (0.42-2.67)          | 0.90             |
|              | South East              | 73 (8.6)   | 1.27            | (0.58-2.86)  | 1.78                  | (0.57-5.56)          | 0.32             |
|              | South West              | 110 (12.9) | 1.38            | (0.66-2.86)  | 1.14                  | (0.42-3.11)          | 0.80             |
|              | West Midlands           | 95 (11.2)  | 0.52            | (0.21-1.26)  | 0.57                  | (0.18-1.78)          | 0.33             |
|              | Yorkshire and Humber    | 130 (15.3) | 0.59            | (0.27-1.32)  | 0.53                  | (0.19-1.47)          | 0.22             |
| Stx          | Stx1+2                  | 183 (21.5) | 1.0 (reference) |              | 1.0 (reference)       |                      |                  |
|              | Stx1                    | 8 (0.9)    | 4.21            | (0.45-39.89) | <b>24.71</b>          | <b>(1.86-328.34)</b> | <b>0.02</b>      |
|              | Stx2                    | 659 (77.5) | 6.97            | (3.02-16.10) | <b>6.08</b>           | <b>(2.32-15.92)</b>  | <b>&lt;0.001</b> |
| Antibiotics  | No                      | 766 (90.1) | 1.0 (reference) |              | 1.0 (reference)       |                      |                  |
|              | Yes                     | 84 (9.9)   | 10.0            | (6.18-16.32) | <b>10.89</b>          | <b>(5.65-20.97)</b>  | <b>&lt;0.001</b> |
| Diarrhea     | No                      | 48 (6.6)   | 1.0 (reference) |              | 1.0 (reference)       |                      |                  |
|              | Yes                     | 802 (94.4) | 9.26            | (1.27-67.70) | 4.00                  | (0.48-33.16)         | 0.20             |

1  
2  
3  
4  
5  
6  
7  
8  
9  
10  
11  
12  
13  
14  
15  
16  
17  
18  
19  
20  
21  
22  
23  
24  
25  
26  
27  
28  
29  
30  
31  
32  
33  
34  
35  
36  
37  
38  
39  
40  
41  
42  
43  
44  
45  
46

|                        |     |            |                 |              |                 |                    |                  |
|------------------------|-----|------------|-----------------|--------------|-----------------|--------------------|------------------|
| <b>Bloody diarrhea</b> | No  | 360 (42.4) | 1.0 (reference) |              | 1.0 (reference) |                    |                  |
|                        | Yes | 490 (57.7) | 5.10            | (3.10-8.38)  | <b>3.70</b>     | <b>(2.00-6.85)</b> | <b>&lt;0.001</b> |
| <b>Nausea</b>          | No  | 562 (66.1) | 1.0 (reference) |              | 1.0 (reference) |                    |                  |
|                        | Yes | 288 (33.9) | 1.52            | (1.04-2.22)  | 1.03            | (0.60-1.76)        | 0.92             |
| <b>Vomiting</b>        | No  | 465 (54.7) | 1.0 (reference) |              | 1.0 (reference) |                    |                  |
|                        | Yes | 385 (45.3) | 6.50            | (4.13-10.23) | <b>5.25</b>     | <b>(2.94-9.38)</b> | <b>&lt;0.001</b> |
| <b>Abdominal pain</b>  | No  | 259 (30.5) | 1.0 (reference) |              | 1.0 (reference) |                    |                  |
|                        | Yes | 591 (69.5) | 1.39            | (0.91-2.13)  | 0.73            | (0.39-1.36)        | 0.32             |
| <b>Fever</b>           | No  | 569 (66.9) | 1.0 (reference) |              | 1.0 (reference) |                    |                  |
|                        | Yes | 281 (33.1) | 1.71            | (1.17-2.50)  | 1.28            | (0.79-2.09)        | 0.32             |

aAdjusted for all other covariates in the model; *stx* – shiga toxin gene

Supplementary Table 3: Adjusted and unadjusted regression analysis - Sensitivity analysis excluding ethnicity variable (n subjects=989)

| Variable     | Category                | n (%)      | Unadjusted      |              | Adjusted <sup>a</sup> |                     | p value          |
|--------------|-------------------------|------------|-----------------|--------------|-----------------------|---------------------|------------------|
|              |                         |            | Odds Ratio      | (95% CI)     | Odds Ratio            | (95% CI)            |                  |
| Age group    | <1                      | 67 (6.8)   | 0.19            | (0.06-0.62)  | <b>0.24</b>           | <b>(0.06-0.92)</b>  | <b>0.04</b>      |
|              | 1-4                     | 456 (46.1) | 1.0 (reference) |              | 1.0 (reference)       |                     |                  |
|              | 5-9                     | 274 (27.7) | 0.62            | (0.40-0.94)  | <b>0.45</b>           | <b>(0.26-0.76)</b>  | <b>0.003</b>     |
|              | 10-15                   | 192 (19.4) | 0.34            | (0.19-0.61)  | <b>0.22</b>           | <b>(0.11-0.47)</b>  | <b>&lt;0.001</b> |
| Sex          | Male                    | 513 (51.9) | 1.0 (reference) |              | 1.0 (reference)       |                     |                  |
|              | Female                  | 476 (48.1) | 1.37            | (0.96-1.96)  | 1.40                  | (0.91-2.16)         | 0.13             |
| Travel       | No                      | 850 (86.0) | 1.0 (reference) |              | 1.0 (reference)       |                     |                  |
|              | Yes                     | 139 (14.0) | 0.46            | (0.24-0.88)  | 0.58                  | (0.26-1.28)         | 0.18             |
| Rurality     | Urban                   | 719 (72.7) | 1.0 (reference) |              | 1.0 (reference)       |                     |                  |
|              | Rural                   | 270 (27.3) | 1.21            | (0.82-1.77)  | 0.97                  | (0.58-1.62)         | 0.90             |
| IMD Quintile | 1 (least disadvantaged) | 231 (23.4) | 1.0 (reference) |              | 1.0 (reference)       |                     |                  |
|              | 2                       | 210 (21.2) | 0.83            | (0.48-1.42)  | 0.65                  | (0.33-1.27)         | 0.21             |
|              | 3                       | 204 (20.6) | 1.28            | (0.77-2.12)  | 0.98                  | (0.51-1.79)         | 0.89             |
|              | 4                       | 170 (17.2) | 1.10            | (0.64-1.89)  | 0.96                  | (0.48-1.94)         | 0.91             |
|              | 5 (most disadvantaged)  | 174 (17.6) | 0.57            | (0.30-1.06)  | <b>0.41</b>           | <b>(0.19-0.90)</b>  | <b>0.03</b>      |
| Region       | East Midlands           | 72 (7.3)   | 0.62            | (0.24-1.59)  | 0.65                  | (0.21-2.02)         | 0.45             |
|              | East of England         | 66 (6.7)   | 1.03            | (0.44-2.42)  | 1.37                  | (0.47-4.00)         | 0.56             |
|              | London                  | 108 (10.9) | 1.0 (reference) |              | 1.0 (reference)       |                     |                  |
|              | North East              | 76 (7.7)   | 1.19            | (0.53-2.64)  | 1.02                  | (0.38-2.71)         | 0.97             |
|              | North West              | 185 (18.7) | 1.20            | (0.63-2.31)  | 1.29                  | (0.57-2.90)         | 0.54             |
|              | South East              | 107 (10.8) | 1.09            | (0.52-2.28)  | 1.74                  | (0.65-4.63)         | 0.27             |
|              | South West              | 127 (12.8) | 1.48            | (0.75-2.93)  | 1.64                  | (0.68-3.99)         | 0.27             |
|              | West Midlands           | 104 (10.5) | 0.54            | (0.23-1.29)  | 0.67                  | (0.24-1.86)         | 0.44             |
|              | Yorkshire and Humber    | 144 (14.6) | 0.62            | (0.29-1.33)  | 0.60                  | (0.24-1.52)         | 0.28             |
| Stx          | Stx1+2                  | 226 (22.9) | 1.0 (reference) |              | 1.0 (reference)       |                     |                  |
|              | Stx1                    | 18 (1.8)   | 1.84            | (0.21-15.84) | 5.34                  | (0.54-52.82)        | 0.15             |
|              | Stx2                    | 745 (75.3) | 6.99            | (3.22-15.17) | <b>5.76</b>           | <b>(2.43-13.67)</b> | <b>&lt;0.001</b> |
| Antibiotics  | No                      | 887 (89.7) | 1.0 (reference) |              | 1.0 (reference)       |                     |                  |
|              | Yes                     | 102 (10.3) | 8.54            | (5.48-13.30) | <b>7.46</b>           | <b>(4.27-13.03)</b> | <b>&lt;0.001</b> |

|                        |     |            |                 |              |                 |                    |                  |
|------------------------|-----|------------|-----------------|--------------|-----------------|--------------------|------------------|
| <b>Diarrhea</b>        | No  | 49 (5.0)   | 1.0 (reference) |              | 1.0 (reference) |                    |                  |
|                        | Yes | 940 (95.0) | 8.61            | (1.18-62.89) | 4.09            | (0.51-32.47)       | 0.18             |
| <b>Bloody diarrhea</b> | No  | 440 (44.5) | 1.0 (reference) |              | 1.0 (reference) |                    |                  |
|                        | Yes | 549 (55.5) | 4.85            | (3.07-7.67)  | <b>3.74</b>     | <b>(2.15-6.49)</b> | <b>&lt;0.001</b> |
| <b>Nausea</b>          | No  | 653 (66.0) | 1.0 (reference) |              | 1.0 (reference) |                    |                  |
|                        | Yes | 336 (34.0) | 1.52            | (1.06-2.18)  | 1.11            | (0.67-1.83)        | 0.69             |
| <b>Vomiting</b>        | No  | 549 (55.5) | 1.0 (reference) |              | 1.0 (reference) |                    |                  |
|                        | Yes | 440 (44.5) | 6.05            | (3.95-9.26)  | <b>4.38</b>     | <b>(2.59-7.40)</b> | <b>&lt;0.001</b> |
| <b>Abdominal pain</b>  | No  | 309 (31.2) | 1.0 (reference) |              | 1.0 (reference) |                    |                  |
|                        | Yes | 680 (68.8) | 1.49            | (0.99-2.25)  | 0.83            | (0.47-1.46)        | 0.52             |
| <b>Fever</b>           | No  | 657 (66.4) | 1.0 (reference) |              | 1.0 (reference) |                    |                  |
|                        | Yes | 332 (33.6) | 1.50            | (1.05-2.16)  | 1.04            | (0.66-1.63)        | 0.86             |

<sup>a</sup>Adjusted for all other covariates in the model; *stx* – shiga toxin gene

Supplementary Table 4: Comparison between logistic regression model and post-hoc matched analysis on ethnicity

| Variable     | Category                | Main model <sup>a</sup> |                     | Post-hoc matched analysis <sup>a</sup> |                     |
|--------------|-------------------------|-------------------------|---------------------|----------------------------------------|---------------------|
|              |                         | Odds Ratio              | (95% CI)            | Odds Ratio                             | (95% CI)            |
| Age group    | <1                      | <b>0.21</b>             | <b>(0.05-0.82)</b>  | 0.40                                   | (0.13-0.90)         |
|              | 1-4                     | 1.0 (reference)         |                     | 1.0 (reference)                        |                     |
|              | 5-9                     | <b>0.43</b>             | <b>(0.25-0.74)</b>  | 0.66                                   | (0.31-1.35)         |
|              | 10-15                   | <b>0.20</b>             | <b>(0.09-0.43)</b>  | 0.28                                   | (0.01-1.01)         |
| Sex          | Male                    | 1.0 (reference)         |                     | 1.0 (reference)                        |                     |
|              | Female                  | 1.38                    | (0.88-2.14)         | 1.76                                   | (0.96-3.34)         |
| Travel       | No                      | 1.0 (reference)         |                     | 1.0 (reference)                        |                     |
|              | Yes                     | 0.64                    | (0.28-1.45)         | 0.71                                   | (0.24-1.99)         |
| Stx          | Stx1+2                  | 1.0 (reference)         |                     | 1.0 (reference)                        |                     |
|              | Stx2                    | <b>5.92</b>             | <b>(2.49-14.10)</b> | <b>14.37</b>                           | <b>(6.66-67.74)</b> |
| IMD Quintile | 1 (least disadvantaged) | 1.0 (reference)         |                     | 1.0 (reference)                        |                     |
|              | 2                       | 0.64                    | (0.32-1.27)         | 0.93                                   | (0.44-2.15)         |
|              | 3                       | 1.01                    | (0.54-1.91)         | 1.40                                   | (0.63-3.30)         |
|              | 4                       | 1.10                    | (0.54-2.26)         | 1.39                                   | (0.58-3.82)         |
|              | 5 (most disadvantaged)  | 0.57                    | (0.25-1.31)         | 0.63                                   | (0.23-1.70)         |

<sup>a</sup>Adjusted for all other covariates in the model; *stx* – shiga toxin gene

Supplementary Table 5: Comparison between logistic regression model and penalized logistic regression model

| Variable             | Category                | Main model <sup>a</sup> |                     | Penalized logistic regression <sup>a</sup> |                     |
|----------------------|-------------------------|-------------------------|---------------------|--------------------------------------------|---------------------|
|                      |                         | Odds Ratio              | (95% CI)            | Odds Ratio                                 | (95% CI)            |
| Age group            | <1                      | <b>0.21</b>             | <b>(0.05-0.82)</b>  | <b>0.21</b>                                | <b>(0.05-0.82)</b>  |
|                      | 1-4                     | 1.0 (reference)         |                     | 1.0 (reference)                            |                     |
|                      | 5-9                     | <b>0.43</b>             | <b>(0.25-0.74)</b>  | <b>0.20</b>                                | <b>(0.09-0.44)</b>  |
|                      | 10-15                   | <b>0.20</b>             | <b>(0.09-0.43)</b>  | <b>0.43</b>                                | <b>(0.25-0.74)</b>  |
| Sex                  | Male                    | 1.0 (reference)         |                     | 1.0 (reference)                            |                     |
|                      | Female                  | 1.38                    | (0.88-2.14)         | 1.37                                       | (0.88-2.13)         |
| Ethnicity            | White                   | 1.0 (reference)         |                     | 1.0 (reference)                            |                     |
|                      | Non-White               | <b>0.28</b>             | <b>(0.11-0.74)</b>  | <b>0.32</b>                                | <b>(0.11-0.96)</b>  |
| Travel               | No                      | 1.0 (reference)         |                     | 1.0 (reference)                            |                     |
|                      | Yes                     | 0.64                    | (0.28-1.45)         | 0.64                                       | (0.28-1.44)         |
| Rurality             | Urban                   | 1.0 (reference)         |                     | 1.0 (reference)                            |                     |
|                      | Rural                   | 0.88                    | (0.52-1.48)         | 0.88                                       | (0.52-1.49)         |
| IMD Quintile         | 1 (least disadvantaged) | 1.0 (reference)         |                     | 1.0 (reference)                            |                     |
|                      | 2                       | 0.64                    | (0.32-1.27)         | 0.64                                       | (0.32-1.27)         |
|                      | 3                       | 1.01                    | (0.54-1.91)         | 1.01                                       | (0.54-1.91)         |
|                      | 4                       | 1.10                    | (0.54-2.26)         | 1.09                                       | (0.53-2.23)         |
|                      | 5 (most disadvantaged)  | 0.57                    | (0.25-1.31)         | 0.55                                       | (0.24-1.26)         |
|                      | Region                  | East Midlands           | 0.59                | (0.18-1.92)                                | 0.59                |
| East of England      |                         | 1.12                    | (0.37-3.37)         | 1.16                                       | (0.39-3.47)         |
| London               |                         | 1.0 (reference)         |                     | 1.0 (reference)                            |                     |
| North East           |                         | 0.71                    | (0.26-1.97)         | 0.73                                       | (0.26-2.05)         |
| North West           |                         | 1.02                    | (0.44-2.37)         | 1.03                                       | (0.44-2.41)         |
| South East           |                         | 1.31                    | (0.48-3.63)         | 1.34                                       | (0.48-3.73)         |
| South West           |                         | 1.25                    | (0.50-3.13)         | 1.28                                       | (0.51-3.21)         |
| West Midlands        |                         | 0.53                    | (0.18-1.53)         | 0.54                                       | (0.19-1.56)         |
| Yorkshire and Humber |                         | 0.52                    | (0.20-1.34)         | 0.52                                       | (0.20-1.35)         |
| Stx                  |                         | Stx1+2                  | 1.0 (reference)     |                                            | 1.0 (reference)     |
|                      | Stx1                    | 5.53                    | (0.53-57.42)        | 5.58                                       | (0.54-57.77)        |
|                      | Stx2                    | <b>5.92</b>             | <b>(2.49-14.10)</b> | <b>5.89</b>                                | <b>(2.38-14.02)</b> |
| Antibiotics          | No                      | 1.0 (reference)         |                     | 1.0 (reference)                            |                     |
|                      | Yes                     | <b>8.46</b>             | <b>(4.71-15.18)</b> | <b>8.36</b>                                | <b>(4.65-15.03)</b> |

|                        |     |                 |                    |                 |                    |
|------------------------|-----|-----------------|--------------------|-----------------|--------------------|
| <b>Diarrhea</b>        | No  | 1.0 (reference) |                    | 1.0 (reference) |                    |
|                        | Yes | 4.04            | (0.50-32.59)       | 3.97            | (0.49-31.93)       |
| <b>Bloody diarrhea</b> | No  | 1.0 (reference) |                    | 1.0 (reference) |                    |
|                        | Yes | <b>3.56</b>     | <b>(2.04-6.24)</b> | <b>3.54</b>     | <b>(2.02-6.21)</b> |
| <b>Nausea</b>          | No  | 1.0 (reference) |                    | 1.0 (reference) |                    |
|                        | Yes | 1.12            | (0.67-1.86)        | 1.12            | (0.67-1.86)        |
| <b>Vomiting</b>        | No  | 1.0 (reference) |                    | 1.0 (reference) |                    |
|                        | Yes | <b>4.47</b>     | <b>(2.62-7.63)</b> | <b>4.48</b>     | <b>(2.63-7.64)</b> |
| <b>Abdominal pain</b>  | No  | 1.0 (reference) |                    | 1.0 (reference) |                    |
|                        | Yes | 0.82            | (0.46-1.46)        | 0.81            | (0.46-1.45)        |
| <b>Fever</b>           | No  | 1.0 (reference) |                    | 1.0 (reference) |                    |
|                        | Yes | 1.05            | (0.67-1.66)        | 0.81            | (0.67-1.66)        |

<sup>a</sup>Adjusted for all other covariates in the model; *stx* – shiga toxin gene



Supplementary Figure 1: Fractional polynomial prediction plots for age and sex by HUS Status

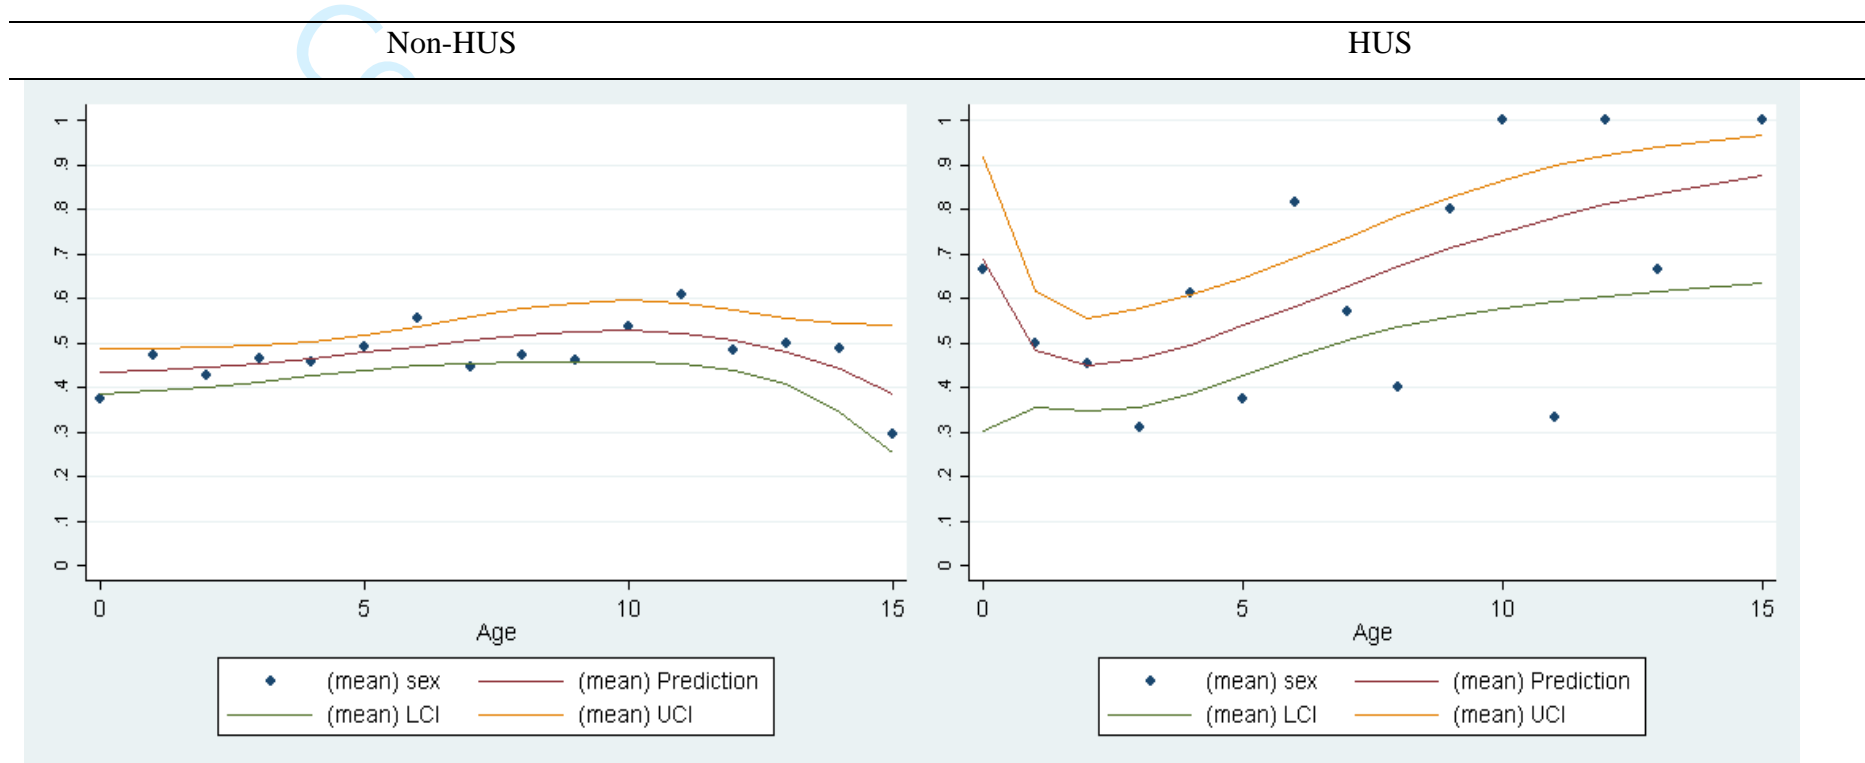

Only

STROBE Statement—Checklist of items that should be included in reports of *cohort studies*

|                              | Item No | Recommendation                                                                                                                                                                                                                                                                                                                                                                                                |
|------------------------------|---------|---------------------------------------------------------------------------------------------------------------------------------------------------------------------------------------------------------------------------------------------------------------------------------------------------------------------------------------------------------------------------------------------------------------|
| <b>Title and abstract</b>    | 1       | (a) Indicate the study's design with a commonly used term in the title or the abstract<br>(b) Provide in the abstract an informative and balanced summary of what was done and what was found                                                                                                                                                                                                                 |
| <b>Introduction</b>          |         |                                                                                                                                                                                                                                                                                                                                                                                                               |
| Background/rationale         | 2       | Explain the scientific background and rationale for the investigation being reported                                                                                                                                                                                                                                                                                                                          |
| Objectives                   | 3       | State specific objectives, including any prespecified hypotheses                                                                                                                                                                                                                                                                                                                                              |
| <b>Methods</b>               |         |                                                                                                                                                                                                                                                                                                                                                                                                               |
| Study design                 | 4       | Present key elements of study design early in the paper                                                                                                                                                                                                                                                                                                                                                       |
| Setting                      | 5       | Describe the setting, locations, and relevant dates, including periods of recruitment, exposure, follow-up, and data collection                                                                                                                                                                                                                                                                               |
| Participants                 | 6       | (a) Give the eligibility criteria, and the sources and methods of selection of participants. Describe methods of follow-up<br>(b) For matched studies, give matching criteria and number of exposed and unexposed                                                                                                                                                                                             |
| Variables                    | 7       | Clearly define all outcomes, exposures, predictors, potential confounders, and effect modifiers. Give diagnostic criteria, if applicable                                                                                                                                                                                                                                                                      |
| Data sources/<br>measurement | 8*      | For each variable of interest, give sources of data and details of methods of assessment (measurement). Describe comparability of assessment methods if there is more than one group                                                                                                                                                                                                                          |
| Bias                         | 9       | Describe any efforts to address potential sources of bias                                                                                                                                                                                                                                                                                                                                                     |
| Study size                   | 10      | Explain how the study size was arrived at                                                                                                                                                                                                                                                                                                                                                                     |
| Quantitative variables       | 11      | Explain how quantitative variables were handled in the analyses. If applicable, describe which groupings were chosen and why                                                                                                                                                                                                                                                                                  |
| Statistical methods          | 12      | (a) Describe all statistical methods, including those used to control for confounding<br>(b) Describe any methods used to examine subgroups and interactions<br>(c) Explain how missing data were addressed<br>(d) If applicable, explain how loss to follow-up was addressed<br>(e) Describe any sensitivity analyses                                                                                        |
| <b>Results</b>               |         |                                                                                                                                                                                                                                                                                                                                                                                                               |
| Participants                 | 13*     | (a) Report numbers of individuals at each stage of study—eg numbers potentially eligible, examined for eligibility, confirmed eligible, included in the study, completing follow-up, and analysed<br>(b) Give reasons for non-participation at each stage<br>(c) Consider use of a flow diagram                                                                                                               |
| Descriptive data             | 14*     | (a) Give characteristics of study participants (eg demographic, clinical, social) and information on exposures and potential confounders<br>(b) Indicate number of participants with missing data for each variable of interest<br>(c) Summarise follow-up time (eg, average and total amount)                                                                                                                |
| Outcome data                 | 15*     | Report numbers of outcome events or summary measures over time                                                                                                                                                                                                                                                                                                                                                |
| Main results                 | 16      | (a) Give unadjusted estimates and, if applicable, confounder-adjusted estimates and their precision (eg, 95% confidence interval). Make clear which confounders were adjusted for and why they were included<br>(b) Report category boundaries when continuous variables were categorized<br>(c) If relevant, consider translating estimates of relative risk into absolute risk for a meaningful time period |

|    |                          |    |                                                                                        |
|----|--------------------------|----|----------------------------------------------------------------------------------------|
| 1  | Other analyses           | 17 | Report other analyses done—eg analyses of subgroups and interactions, and              |
| 2  |                          |    | sensitivity analyses                                                                   |
| 3  |                          |    |                                                                                        |
| 4  | <b>Discussion</b>        |    |                                                                                        |
| 5  | Key results              | 18 | Summarise key results with reference to study objectives                               |
| 6  | Limitations              | 19 | Discuss limitations of the study, taking into account sources of potential bias or     |
| 7  |                          |    | imprecision. Discuss both direction and magnitude of any potential bias                |
| 8  |                          |    |                                                                                        |
| 9  | Interpretation           | 20 | Give a cautious overall interpretation of results considering objectives, limitations, |
| 10 |                          |    | multiplicity of analyses, results from similar studies, and other relevant evidence    |
| 11 | Generalisability         | 21 | Discuss the generalisability (external validity) of the study results                  |
| 12 |                          |    |                                                                                        |
| 13 | <b>Other information</b> |    |                                                                                        |
| 14 | Funding                  | 22 | Give the source of funding and the role of the funders for the present study and, if   |
| 15 |                          |    | applicable, for the original study on which the present article is based               |
| 16 |                          |    |                                                                                        |

\*Give information separately for exposed and unexposed groups.

**Note:** An Explanation and Elaboration article discusses each checklist item and gives methodological background and published examples of transparent reporting. The STROBE checklist is best used in conjunction with this article (freely available on the Web sites of PLoS Medicine at <http://www.plosmedicine.org/>, Annals of Internal Medicine at <http://www.annals.org/>, and Epidemiology at <http://www.epidem.com/>). Information on the STROBE Initiative is available at <http://www.strobe-statement.org>.

# BMJ Paediatrics Open

## Sociodemographic and clinical risk-factors for paediatric typical haemolytic uraemic syndrome

|                               |                                                                                                                                                                                                                                                                                                                                                                                                                                                                                                                                                                                                                                                                                                                                                                                                                                                                                                                                                                                                                                                                                                                                                                                                                                                                                                                                                                                                                                                                                                                                                                                                                                                           |
|-------------------------------|-----------------------------------------------------------------------------------------------------------------------------------------------------------------------------------------------------------------------------------------------------------------------------------------------------------------------------------------------------------------------------------------------------------------------------------------------------------------------------------------------------------------------------------------------------------------------------------------------------------------------------------------------------------------------------------------------------------------------------------------------------------------------------------------------------------------------------------------------------------------------------------------------------------------------------------------------------------------------------------------------------------------------------------------------------------------------------------------------------------------------------------------------------------------------------------------------------------------------------------------------------------------------------------------------------------------------------------------------------------------------------------------------------------------------------------------------------------------------------------------------------------------------------------------------------------------------------------------------------------------------------------------------------------|
| Journal:                      | <i>BMJ Paediatrics Open</i>                                                                                                                                                                                                                                                                                                                                                                                                                                                                                                                                                                                                                                                                                                                                                                                                                                                                                                                                                                                                                                                                                                                                                                                                                                                                                                                                                                                                                                                                                                                                                                                                                               |
| Manuscript ID                 | bmjpo-2019-000465.R1                                                                                                                                                                                                                                                                                                                                                                                                                                                                                                                                                                                                                                                                                                                                                                                                                                                                                                                                                                                                                                                                                                                                                                                                                                                                                                                                                                                                                                                                                                                                                                                                                                      |
| Article Type:                 | Original article                                                                                                                                                                                                                                                                                                                                                                                                                                                                                                                                                                                                                                                                                                                                                                                                                                                                                                                                                                                                                                                                                                                                                                                                                                                                                                                                                                                                                                                                                                                                                                                                                                          |
| Date Submitted by the Author: | 13-Jun-2019                                                                                                                                                                                                                                                                                                                                                                                                                                                                                                                                                                                                                                                                                                                                                                                                                                                                                                                                                                                                                                                                                                                                                                                                                                                                                                                                                                                                                                                                                                                                                                                                                                               |
| Complete List of Authors:     | <p>Adams, Natalie; NIHR Health Protection Research Unit in Gastrointestinal Infections; Public Health England, National Infection Service</p> <p>Byrne, Lisa; Public Health England, National Infection Service</p> <p>Rose, Tanith; NIHR Health Protection Research Unit in Gastrointestinal Infections; University of Liverpool, Department of Public Health and Policy</p> <p>Adak, Bob; NIHR Health Protection Research Unit in Gastrointestinal Infections</p> <p>Jenkins, Claire; Public Health England, National Infection Service; NIHR Health Protection Research Unit in Gastrointestinal Infections</p> <p>Charlett, Andre; Public Health England, National Infection Service</p> <p>Violato, Mara; NIHR Health Protection Research Unit in Gastrointestinal Infections; University of Oxford, Health Economics Research Centre</p> <p>O'Brien, Sarah; NIHR Health Protection Research Unit in Gastrointestinal Infections; University of Liverpool, Department of Public Health and Policy</p> <p>Whitehead, Margaret; NIHR Health Protection Research Unit in Gastrointestinal Infections; University of Liverpool, Department of Public Health and Policy</p> <p>Barr, Benjamin; NIHR Health Protection Research Unit in Gastrointestinal Infections; University of Liverpool, Department of Public Health and Policy</p> <p>Taylor-Robinson, David; NIHR Health Protection Research Unit in Gastrointestinal Infections; University of Liverpool, Department of Public Health and Policy</p> <p>Hawker, Jeremy; NIHR Health Protection Research Unit in Gastrointestinal Infections; Public Health England, National Infection Service</p> |
| Keywords:                     | Epidemiology, Infectious Diseases                                                                                                                                                                                                                                                                                                                                                                                                                                                                                                                                                                                                                                                                                                                                                                                                                                                                                                                                                                                                                                                                                                                                                                                                                                                                                                                                                                                                                                                                                                                                                                                                                         |
|                               |                                                                                                                                                                                                                                                                                                                                                                                                                                                                                                                                                                                                                                                                                                                                                                                                                                                                                                                                                                                                                                                                                                                                                                                                                                                                                                                                                                                                                                                                                                                                                                                                                                                           |

SCHOLARONE™  
Manuscripts

**Title Page**

**Title:** Sociodemographic and clinical risk-factors for paediatric typical haemolytic uraemic syndrome: a retrospective cohort study

**Authors:**

Natalie L. Adams\*<sup>1,2,3</sup>, Lisa Byrne<sup>1,3</sup>, Tanith C. Rose<sup>1,2</sup>, Goutam K. Adak<sup>1</sup>, Claire Jenkins<sup>1,3</sup>, Andre Charlett<sup>3</sup>, Mara Violato<sup>1,4</sup>, Sarah J. O'Brien<sup>1,2</sup>, Margaret Whitehead<sup>1,2</sup>, Benjamin Barr<sup>1,2</sup>, David Taylor-Robinson<sup>1,2±</sup> and Jeremy Hawker<sup>1,3±</sup>

\*Corresponding author

± Joint senior authors

**Affiliations:**

<sup>1</sup>NIHR Health Protection Research Unit in Gastrointestinal Infections, UK

<sup>2</sup>Department of Public Health and Policy, University of Liverpool, UK

<sup>3</sup>National Infection Service, Public Health England, UK

<sup>4</sup>Health Economics Research Centre, University of Oxford, Oxford, UK

**Disclaimers:**

The research was funded by the National Institute for Health Research Health Protection Research Unit (NIHR HPRU) in Gastrointestinal Infections at University of Liverpool in partnership with Public Health England (PHE), in collaboration with University of East Anglia, University of Oxford and the Quadram Institute. Natalie Adams is based at the University of Liverpool and Public Health England. The views expressed are those of the

1  
2  
3 author(s) and not necessarily those of the NHS, the NIHR, the Department of Health or  
4  
5 Public Health England.  
6  
7

8 **Running title:**  
9

10  
11 Paediatric HUS in England 2011-2014  
12  
13

14  
15 **Corresponding author contact information:**  
16

17  
18 Dr Natalie L Adams, Gastrointestinal Infections Department, National Infection Service,  
19  
20 Public Health England, 61 Colindale Ave, Colindale NW9 5EQ, UK  
21

22  
23 [Natalie.Adams@phe.gov.uk](mailto:Natalie.Adams@phe.gov.uk)  
24  
25

26  
27  
28  
29 **Word count (abstract): 243/250**  
30

31  
32 **Word count (text): 2727/2500**  
33

34  
35 **References: 32/40**  
36  
37  
38  
39  
40  
41  
42  
43  
44  
45  
46  
47  
48  
49  
50  
51  
52  
53  
54  
55  
56  
57  
58  
59  
60

## ABSTRACT

### Objectives

Haemolytic Uraemic Syndrome (HUS) following Shiga toxin-producing *Escherichia coli* (STEC) infection is the commonest cause of acute renal failure among children in the United Kingdom. This study explored differential progression from STEC to HUS by social, demographic and clinical risk factors.

### Methods

We undertook a retrospective cohort study linking two datasets. We extracted data on paediatric STEC and HUS cases identified in the Public Health England National Enhanced Surveillance System for STEC and British Paediatric Surveillance Unit HUS surveillance from October 1 2011 to October 31 2014. Using logistic regression, we estimated the odds of HUS progression by risk factors.

### Results

1059 paediatric STEC cases were included in the study, of which 207 (19.55%, 95% CI 17-22%) developed HUS. In the fully-adjusted model, the odds of progression to HUS were highest in those aged 1-4 (OR 4.93, 95% CI 2.30-10.56, compared to 10-15 years), were infected with an stx2-only strain (OR 5.92, 95%CI 2.49-14.10), were prescribed antibiotics (OR 8.46, 95% CI 4.71-15.18), had bloody diarrhoea (OR 3.56, 95%CI 2.04-6.24) or vomiting (OR 4.47, 95%CI 2.62-7.63), but there was no association with progression to HUS by socioeconomic circumstances or rurality.

### Conclusion

1  
2  
3 Combining data from an active clinical surveillance system for HUS with the national  
4 enhanced STEC surveillance system suggests that 20% of diagnosed paediatric STEC  
5  
6 infections in England resulted in HUS No relationship was found with socioeconomic status  
7  
8 or rurality of cases, but differences were demonstrated by age, stx type and presenting  
9  
10 symptoms.  
11  
12  
13  
14  
15  
16  
17  
18

19 **Keywords:** Health inequalities; Shiga-toxin producing *Escherichia coli*; STEC; Haemolytic  
20  
21 Uraemic Syndrome; HUS  
22  
23  
24  
25  
26  
27  
28  
29  
30  
31  
32  
33  
34  
35  
36  
37  
38  
39  
40  
41  
42  
43  
44  
45  
46  
47  
48  
49  
50  
51  
52  
53  
54  
55  
56  
57  
58  
59  
60



## INTRODUCTION

Haemolytic uraemic syndrome (HUS) is a rare but serious complication of infection with Shiga toxin-producing *Escherichia coli* (STEC), affecting the blood, kidneys and, in the most severe cases, the central nervous system. Children and the elderly are considered to be the most susceptible age groups and HUS is recognised as the most common cause of acute renal failure among children in the United Kingdom (1). Strains of STEC encoding *stx2* toxin genes are more often associated with HUS than other strains (1-6). STEC serogroup O157 is the most frequently reported strain causing illness in England. Transmission to humans occurs through consumption of contaminated food or water, exposure to a contaminated environment involving direct or indirect contact with animals or their faeces and person-to-person spread.

It is estimated that progression to HUS following STEC infection could be as high as 15% in young children (2, 7). Several studies have suggested that development of HUS varies by some demographic characteristics; higher incidence of HUS has been documented in children (particularly aged 1-4), females (particularly aged over 10 years) and in those of White ethnicity (2, 6, 8-13); however few have documented progression to HUS by other demographic characteristics such as deprivation, foreign travel, rurality or region. There is evidence to suggest that those who are disadvantaged have a lower risk of STEC infection (14-16), and potentially a lower risk of progression to HUS outside of England (16,17), however no studies have looked at the relationship between SES, STEC and HUS in England. This study aims to investigate the relationship between demographic factors, STEC infection and subsequent development of HUS in a well-characterised paediatric population in England with high case-ascertainment.

## METHODS

### *Data, setting and source*

We undertook a retrospective cohort study linking two data sources; the Public Health England (PHE) National Enhanced Surveillance System for STEC (NESSS) and the British Paediatric Surveillance Unit (BPSU) HUS Study in conjunction with PHE. The linkage of two robust datasets, both of which can record HUS status, ensures high ascertainment of HUS cases. Firstly, we extracted data on STEC cases aged 0-15 years (inclusive) identified in NESSS during the period of the BPSU HUS Study (October 1 2011 to October 31 2014). All laboratory-confirmed STEC cases in England are reported by NHS laboratories to Public Health England staff who collect standardised data through an enhanced surveillance questionnaire (ESQ) as part of their public health response: this standardised dataset is collated centrally in NESSS for further validation and analysis. The ESQ collects detailed information on patient demographics, symptoms, food and water exposures and UK and non-UK travel during the exposure period (the week prior to illness onset). When a presumptive STEC is identified at the local laboratory or a case of HUS is identified, specimens are sent to PHE Gastrointestinal Bacteria Reference Unit (GBRU) for testing and patient ESQs are linked to microbiological results. Due to the timing of the ESQ administration in NESSS (which is designed to inform the acute public health response), this system can under-ascertain HUS as this can develop after completion of the questionnaire. This surveillance system is described in detail elsewhere (2).

Secondly, we extracted clinical data on paediatric (<16 years) HUS cases, collected by the BPSU HUS Study, an active surveillance system requiring regular returns from clinicians. Within this study, data were captured using a standardised questionnaire administered to paediatricians collecting information on; case demography; treatment history; microbiological investigations; clinical parameters of illness; clinical management of illness and status of the case at the time of data capture. Cases in the BPSU dataset were linked on

1  
2  
3 National Health Service (NHS) number, which was available for all cases, to those in the  
4  
5 NESS dataset to create a retrospective cohort. Supplementary Figure 1 provides details of  
6  
7 the selection of study participants.  
8  
9

10  
11 For statistical analysis, cases for whom no microbiological information was available (n=4)  
12  
13 and cases identified via serological testing only (n=66) were excluded in order to assess the  
14  
15 role of *stx* subtype. Due to missing data for the ethnicity variable (19.1%), we used multiple  
16  
17 imputation using chained equations to impute values where ethnicity (white/non-white) was  
18  
19 missing for statistical analysis. Fifty imputed datasets were generated. The distribution of  
20  
21 ethnicity by age, sex and region was assessed to check the missing at random (MAR)  
22  
23 assumption. There was no difference in missing ethnicity by sex, however there were some  
24  
25 differences by age group (57.3% of cases with missing ethnicity were in the 1-4 age group;  
26  
27 n=114/199) and region (31.2% of cases with missing ethnicity were in London; n=62/199);  
28  
29 these were not regarded as problematic however as, given the observed data for other  
30  
31 variables, the missing data were considered independent.  
32  
33  
34  
35  
36

### 37 *Ethics*

38  
39  
40 Ethical approval was originally obtained for the main study (Ref: 11/LO/1412). As of  
41  
42 October 2010, HUS is a statutory reportable condition and this study falls under the existing  
43  
44 Health Protection Agency (now Public Health England) permissions under Section 251 of the  
45  
46 NHS Act 2006. In addition, we received a favourable ethical opinion from the South East  
47  
48 Coast - Surrey Research Ethics Committee (15/LO/2138) on 1 December 2015 covering the  
49  
50 use of this dataset for this study.  
51  
52  
53

### 54 *Patient involvement*

55  
56  
57 Patients were not directly involved in the design of this study.  
58  
59  
60

### *Outcome and exposures*

The outcome of interest was HUS, determined by the case meeting the BPSU clinical criteria (See supplementary Table 1) (18) or completion of the HUS field in the ESQ. Covariates in the analysis were age group (<1, 1-4, 5-9, 10-15 years); sex (male/female); ethnicity (White/non-White); travel (yes/no); rurality (rural/urban); microbiology (Shiga-toxin (*Stx*)); antibiotic use (yes/no); clinical symptoms (diarrhoea, bloody diarrhoea, nausea, vomiting, abdominal pain, fever) and region of residence. The *stx* type, the primary STEC virulence factor, was used as the main microbiological variable (19). Where symptoms, travel status and healthcare contact variables were blank or unknown, these were recoded as a negative response. As a proxy for childhood socioeconomic circumstances (SECs) we used a small-area deprivation measure, the Index of Multiple Deprivation 2010 (IMD) (20), assigned to each case based on their postcode and divided into population-level quintiles, with the first quintile representing the least deprived and the fifth quintile representing the most deprived.

### *Analysis strategy*

Comparisons of proportions were tested using the chi-squared test. We explored univariate relationships between progression to HUS and the covariates of interest before fitting a multivariate logistic regression model. All variables were retained in this model in order to control for any potential confounding. Interaction terms between variables (IMD, ethnicity, age and sex) were tested to investigate whether the strength of any relationship was moderated by the inclusion of another variable. Analyses were conducted in Stata 13.1 (Statacorp, Texas).

### *Robustness tests*

We performed multiple sensitivity analyses to test the validity of the main analysis; first by (i) excluding cases that were likely to have a travel-acquired STEC infection (date of onset is within one exposure period, 7 days, of having returned from outside of the UK) and (ii) separately excluding cases with unknown ethnicity to determine whether there were differences in progression to HUS by SECs for children who travelled abroad during their incubation period compared to those who did not or those with ethnicity recorded and those without respectively.

## RESULTS

### *Descriptive analysis*

Of 1059 paediatric STEC cases included in the study, 207 (19.55%, 95% CI 17.27%-22.04%) developed HUS. Progression to HUS varied by age and gender (Table 1), the highest was observed in females aged 1-4 years (26.0%). A higher proportion of progression to HUS was observed in females aged 10-15 years compared to males of the same age (19.3%, 95% CI 12.3-27.9 versus 7.1%, 95% CI 2.9-14.2,  $p=0.01$ ), and amongst females aged less than 1 year compared to males of the same age, although this was not significant (14.3%, 95% CI 4.0-32.7 versus 4.8%, 95% CI 0.6-16.2,  $p=0.16$ ). Although progression to HUS was higher in the least disadvantaged quintile (47/245, 19.2%, 95% CI 14.4-24.7%) compared with the most disadvantaged quintile (29/189, 15.3%, 95% CI 10.5-21.3%) this difference was not statistically significant ( $p=0.29$ ). The highest proportion progressing to HUS was in quintile 3 (53/219, 24.2%, 95% CI 18.7-30.4%) and there was no clear pattern across the 5 quintiles ( $p=0.07$ ; quintile 2 - 35/221, 15.8%, 95% CI 11.3-21.3%; quintile 4 - 43/185, 23.2%, 95% CI 17.4-30%).

### *Multivariable analysis*

1  
2  
3 In the fully adjusted model (Table 2), there were significantly lower odds of HUS amongst  
4 <1, 5-9 and 10-15 year olds compared to 1-4 year olds and significantly higher odds of HUS  
5 amongst those infected with *stx2*-only strains, those prescribed antibiotics and among those  
6 who had experienced bloody diarrhoea or vomiting . The most disadvantaged children had  
7 lower odds of progression to HUS compared to the least disadvantaged children (OR 0.57,  
8 95% CI 0.25-1.31) but the difference was not significant. There was no statistically  
9 significant difference in risk by rurality (OR 0.88, 95% CI 0.52-1.48) or by region (Table 2).  
10 There were no significant interactions identified (data not shown).  
11  
12  
13  
14  
15  
16  
17  
18  
19  
20  
21

22 The sensitivity analyses conducted to assess the robustness of the findings did not alter the  
23 overall conclusions of this research (Supplementary Tables 2 and 3).  
24  
25  
26  
27

## 28 **DISCUSSION**

29  
30  
31 In a novel linkage and analysis of two datasets with high case-ascertainment to explore the  
32 role of demographic and socioeconomic factors in the development of HUS following STEC  
33 infection, we found progression from STEC infection to HUS to be 20% in this paediatric  
34 cohort in England. Odds of HUS progression varied by age, *stx* type, antibiotic exposure and  
35 clinical presentation, with children aged 1-4 years infected with *stx2*-only, with reported  
36 antibiotic exposure and presenting with bloody diarrhoea or vomiting at highest risk. Few  
37 studies have explored the social patterning of risk factors for STEC (21) or the socio-  
38 demographic risk factors associated with progression to HUS, and no such studies have been  
39 undertaken in England. We found no relationship between progression to HUS and  
40 socioeconomic status in children in this study.  
41  
42  
43  
44  
45  
46  
47  
48  
49  
50  
51  
52  
53  
54

55 Our study has several strengths. This study captures the progression of HUS in a well-  
56 characterised paediatric STEC population. To the best of our knowledge, as confirmed by a  
57 prior review of the literature and discussion with national experts, this is the first study to  
58  
59  
60

1  
2  
3 combine a prospective active surveillance system and a multisource national surveillance  
4  
5 system to study the risk factors for HUS and as such is likely to have better case-  
6  
7 ascertainment of HUS than previous studies and is related to good STEC denominators.  
8  
9  
10 Furthermore, this study makes use of one of the largest cohorts of HUS cases. The results of  
11  
12 this study are likely to be generalisable to other high-income countries with a similar pattern  
13  
14 of STEC infection. Despite this, there are some limitations. It is possible that there is residual  
15  
16 confounding that could not be controlled for, such as intrinsic childhood characteristics which  
17  
18 may increase differential vulnerability or susceptibility by SEC such as genetic  
19  
20 predisposition, co-morbidities, and clinical or treatment characteristics. Further, as an area-  
21  
22 level measure of SEC was used, it is possible that it may not have been sensitive enough to  
23  
24 detect the effect of socioeconomic inequalities, particularly if individual factors rather than  
25  
26 area-level factors have more influence over the risk of acquiring more severe strains of STEC  
27  
28 with increased risk of progression to HUS. However, person-to-person spread is an important  
29  
30 risk factor for GI infections and, although there is a risk of ecological fallacy, area-level  
31  
32 measures have the advantage of including potential environmental factors such as housing  
33  
34 and living environment deprivation which are likely to be important factors in considering  
35  
36 individual risk of infection. Excluding individuals with a serological result only from the  
37  
38 statistical analysis may introduce a potential bias leading to an underestimate of HUS  
39  
40 incidence, which may be important if there are geographical or host-factors which are linked  
41  
42 to severity of illness, although the number of serology-only diagnoses was small. In England,  
43  
44 most diagnosed cases of STEC are of serogroup O157 (95% in our study), and it is possible  
45  
46 that our results may be biased towards the relationship between STEC O157 and progression  
47  
48 to HUS, which may differ if other, possibly less pathogenic, serogroups predominate. It is  
49  
50 possible however, that the risk of progression to HUS could be different in populations  
51  
52 exposed to STEC organisms with a lower proportion of stx2-only producing strains, or with a  
53  
54  
55  
56  
57  
58  
59  
60

1  
2  
3 different age distribution of cases. There were also some missing data in our study,  
4 particularly for ethnicity, which we addressed using multiple imputation. The ethnicity  
5 variable used (White/Non-White) was also crude and adopted because of data quality issues.  
6  
7 This may mask differences in socioeconomic status. No data were available on whether the  
8 children included in our study had underlying or chronic conditions which may be related to  
9 their risk of developing HUS. Finally, it was not always possible to determine whether  
10 antibiotics had been prescribed during treatment for STEC infection or following a diagnosis  
11 of HUS therefore the relevant association should be interpreted with caution.  
12  
13  
14  
15  
16  
17  
18  
19  
20  
21

22 The finding of 19.5% (95% CI 17-22%) of diagnosed STEC cases progressing to HUS is  
23 higher than previous studies, which have estimated the proportion of paediatric cases of  
24 STEC O157 progressing to HUS to be 15% (95% CI 11-19%) in females aged 1-4 years in  
25 England (2) and 15.3% (95% CI 13-18%) in children aged <5 years in the USA (7). Our  
26 study uses data derived from two linked surveillance systems providing high ascertainment of  
27 both STEC and HUS cases which provides a more robust estimate. It is likely that there will  
28 also be a bias resulting from ascertainment of STEC cases from laboratory specimens, as  
29 milder cases of gastrointestinal infection are less likely to be microbiologically tested, but this  
30 will also be true of previous published studies.  
31  
32  
33  
34  
35  
36  
37  
38  
39  
40  
41  
42  
43

44 Whilst rurality has been reported as an important factor in risk for STEC infection (2, 14), our  
45 study suggests that rurality is not a significant driver of progression to HUS. It is important to  
46 note that there are environmental factors, such as cattle density, that were not included in this  
47 study and which may be more important factors in risk of STEC infection. Our finding that  
48 rurality was not linked to progression to HUS following STEC infection may also be due to  
49 the majority of our cases (95%) being STEC O157 – this finding may be different in more  
50 heterogenous dataset from countries with greater variability by serogroup. Similarly, despite  
51 evidence to suggest that the risk and consequences of GI infections in general are greater for  
52  
53  
54  
55  
56  
57  
58  
59  
60



1  
2  
3 disadvantaged children (22-26) – the finding in our study suggests that lower childhood SEC  
4 is unlikely to be a contributor for development of HUS.  
5  
6  
7

8  
9 Previous studies in England have suggested that children aged 1-4 years, females and white  
10 ethnic groups have the highest incidence of STEC infection (2, 27). Our study echoes the  
11 findings by Milford et al (6) which demonstrated higher progression to HUS amongst  
12 children aged 1-4 years. No overall difference in risk of HUS by sex was identified in our  
13 study, a finding echoed in several other previous studies (28-31); this is an area of  
14 disagreement in the literature with several studies finding higher risk amongst women (7, 17,  
15 32) although two of these studies finding higher risk in women did not look specifically  
16 amongst children (7, 32). We did find differences in risk by sex within specific age groups,  
17 with a greater proportion of progression to HUS amongst girls less than 1 year of age and 10-  
18 15 years of age compared to boys of the same age groups (Table 1), although no significant  
19 interaction between age and sex could be identified. The reasons for the differential risk by  
20 age are currently unclear and call for a deeper understanding of differences in risks and  
21 exposures between these groups.  
22  
23  
24  
25  
26  
27  
28  
29  
30  
31  
32  
33  
34  
35  
36  
37  
38

39 The association between clinical presentation with vomiting and bloody diarrhoea and  
40 increased risk of HUS reported in this study has been identified previously (12) and, as such,  
41 the presence of these symptoms particularly in paediatric STEC cases should evoke a high  
42 level of clinical suspicion for the potential development of HUS.  
43  
44  
45  
46  
47  
48

49 Our study quantifies the proportion of paediatric STEC cases progressing to HUS in a well –  
50 defined population with high ascertainment. It also quantifies the risk factors associated with  
51 progression to HUS in terms of sociodemographic characteristics as well as clinical  
52 presentation. Further research is warranted to elucidate the populations at risk of STEC  
53  
54  
55  
56  
57  
58  
59  
60

1  
2  
3 infection and HUS in terms of deprivation, ethnicity, age and sex, in order to better  
4  
5 understand whether there are real differences in risk or artefacts of surveillance.  
6  
7

## 8 **FUNDING**

9  
10  
11 The research was funded by the National Institute for Health Research Health Protection  
12  
13 Research Unit (NIHR HPRU) in Gastrointestinal Infections [grant number NIHR HPRU  
14  
15 201210,038] at University of Liverpool in partnership with Public Health England (PHE), in  
16  
17 collaboration with University of East Anglia, University of Oxford and the Quadram  
18  
19 Institute. Natalie Adams is based at the University of Liverpool and Public Health England.  
20  
21

22  
23 The views expressed are those of the author(s) and not necessarily those of the NHS, the  
24  
25 NIHR, the Department of Health and Social Care or Public Health England. David Taylor-  
26  
27 Robinson is funded by the MRC on a Clinician Scientist Fellowship (MR/P008577/1). Ben  
28  
29 Barr and Tanith Rose were also supported by the National Institute for Health Research  
30  
31 (NIHR) Collaboration for Leadership in Health Research and Care (CLAHRC NWC).  
32  
33  
34

## 35 **CONFLICT OF INTEREST**

36  
37  
38 All authors: No potential conflicts of interest.  
39  
40

## 41 **ACKNOWLEDGMENTS**

42  
43  
44 This work was funded by the National Institute for Health Research Health Protection  
45  
46 Research Unit in Gastrointestinal Infections. The authors would like to thank Kirsten Glen  
47  
48 and Naomi Lauenders for their work on the National Enhanced Surveillance System for STEC,  
49  
50 Ross Harris for statistical advice and Richard Lynn at the British Paediatric Surveillance Unit  
51  
52 for facilitating the BPSU HUS study.  
53  
54  
55

## 56 **CONFLICT OF INTEREST**

1  
2  
3  
4  
5  
6  
7  
8  
9  
10  
11  
12  
13  
14  
15  
16  
17  
18  
19  
20  
21  
22  
23  
24  
25  
26  
27  
28  
29  
30  
31  
32  
33  
34  
35  
36  
37  
38  
39  
40  
41  
42  
43  
44  
45  
46  
47  
48  
49  
50  
51  
52  
53  
54  
55  
56  
57  
58  
59  
60

The authors declare that they have no conflicts of interest.

Confidential: For Review Only

### WHAT IS ALREADY KNOWN ON THIS TOPIC

- HUS is recognised as the most common cause of acute renal failure among children in the United Kingdom.
- It is estimated that progression to HUS following STEC infection could be as high as 15% in young children.
- Several studies have suggested that development of HUS varies by demographic characteristics however few have documented progression to HUS by demographic characteristics.

### WHAT THIS STUDY ADDS

- A fifth of paediatric STEC cases developed the serious complication of haemolytic uraemic syndrome in England.
- This figure is higher than previously reported in England, and varied by demographic and clinical factors
- Socioeconomic factors did not influence progression to SES.

## REFERENCES

1. Lynn RM, O'Brien SJ, Taylor CM, et al. Childhood hemolytic uremic syndrome, United Kingdom and Ireland. *Emerging Infectious Diseases*. 2005;11(4):590-6. doi:10.3201/eid1104.040833
2. Byrne L, Jenkins C, Launders N, Elson R, Adak GK. The epidemiology, microbiology and clinical impact of Shiga toxin-producing *Escherichia coli* in England, 2009-2012. *Epidemiology and Infection*. 2015;1-13. doi:10.1017/S0950268815000746
3. Ethelberg S, Olsen KE, Scheutz F, et al. Virulence factors for hemolytic uremic syndrome, Denmark. *Emerging Infectious Diseases*. 2004;10(5):842-7. doi:10.3201/eid1005.030576
4. Persson S, Olsen KE, Ethelberg S, Scheutz F. Subtyping method for *Escherichia coli* shiga toxin (verocytotoxin) 2 variants and correlations to clinical manifestations. *J Clin Microbiol*. 2007;45(6):2020-4. doi:10.1128/JCM.02591-06
5. Dallman TJ, Ashton PM, Byrne L, et al. Applying phylogenomics to understand the emergence of Shiga-toxin-producing *Escherichia coli* O157:H7 strains causing severe human disease in the UK. *Microbial Genomics*. 2015;1(3). doi:doi:10.1099/mgen.0.000029
6. Milford DV, Taylor CM, Guttridge B, Hall SM, Rowe B, Kleanthous H. Haemolytic uraemic syndromes in the British Isles 1985-8: association with verocytotoxin producing *Escherichia coli*. Part 1: Clinical and epidemiological aspects. *Archives of Disease in Childhood*. 1990;65(7):716-21.
7. Gould LH, Demma L, Jones TF, et al. Hemolytic uremic syndrome and death in persons with *Escherichia coli* O157:H7 infection, foodborne diseases active surveillance network sites, 2000-2006. *Clinical Infectious Diseases*. 2009;49(10):1480-5. doi:10.1086/644621
8. Kinney JS, Gross TP, Porter CC, Rogers MF, Schonberger LB, Hurwitz ES. Hemolytic-uremic syndrome: a population-based study in Washington, DC and Baltimore, Maryland. *American Journal of Public Health*. 1988;78(1):64-5.
9. Rogers MF, Rutherford GW, Alexander SR, et al. A population-based study of hemolytic-uremic syndrome in Oregon, 1979-1982. *American Journal of Epidemiology*. 1986;123(1):137-42.
10. Tarr PI, Hickman RO. Hemolytic uremic syndrome epidemiology: a population-based study in King County, Washington, 1971 to 1980. *Pediatrics*. 1987;80(1):41-5.
11. Bell WR. Thrombotic thrombocytopenic purpura/hemolytic uremic syndrome relapse: frequency, pathogenesis, and meaning. *Seminars in hematology*. 1997;34(2):134-9.
12. Launders N, Byrne L, Jenkins C, Harker K, Charlett A, Adak GK. Disease severity of Shiga toxin-producing *E. coli* O157 and factors influencing the development of typical haemolytic uraemic syndrome: a retrospective cohort study, 2009-2012. *BMJ open*. 2016;6(1). doi:10.1136/bmjopen-2015-009933
13. Elliott EJ, Robins-Browne RM, O'Loughlin EV, et al. Nationwide study of haemolytic uraemic syndrome: clinical, microbiological, and epidemiological features. *Arch Dis Child*. 2001;85:125-31.
14. Chang M, Groseclose SL, Zaidi AA, Braden CR. An ecological analysis of sociodemographic factors associated with the incidence of salmonellosis, shigellosis, and *E. coli* O157:H7 infections in US counties. *Epidemiology and Infection*. 2009;137(6):810-20. doi:10.1017/s0950268808001477
15. Jalava K, Ollgren J, Eklund M, Siitonen A, Kuusi M. Agricultural, socioeconomic and environmental variables as risks for human verotoxigenic *Escherichia coli* (VTEC) infection in Finland. *BMC Infect Dis*. 2011;11:275. doi: <http://dx.doi.org/10.1186/1471-2334-11-275>. PubMed PMID: 22008456; PubMed Central PMCID: PMC3226588.

16. Whitney BM, Mainero C, Humes E, Hurd S, Niccolai L, Hadler JL. Socioeconomic status and foodborne pathogens in Connecticut, USA, 2000–2011. *Emerging Infectious Diseases*. 2015;21(9):1617-24. doi: 10.3201/eid2109.150277.
17. Rowe PC, Orrbine E, Wells GA, McLaine PN. Epidemiology of hemolytic-uremic syndrome in Canadian children from 1986 to 1988. The Canadian Pediatric Kidney Disease Reference Centre. *Journal of Pediatrics*. 1991;119(2):218-24.
18. Byrne L, on behalf of the BPSU HUS Study Team. BPSU HUS Study Report. 2017.
19. Ethelberg S, Olsen KE, Scheutz F, et al. Virulence factors for hemolytic uremic syndrome, Denmark. *Emerg Infect Dis*. 2004;10(5):842-7. doi:10.3201/eid1005.030576
20. Department for Communities and Local Government. English Indices of Deprivation 2010. Department for Communities and Local Government. 2011. [https://www.gov.uk/government/uploads/system/uploads/attachment\\_data/file/6871/1871208.pdf](https://www.gov.uk/government/uploads/system/uploads/attachment_data/file/6871/1871208.pdf). Accessed 16/09/2016.
21. Bentancor AB, Ameal LA, Calvino MF, Martinez MC, Miccio L, Degregorio OJ. Risk factors for Shiga toxin-producing *Escherichia coli* infections in preadolescent schoolchildren in Buenos Aires, Argentina. *Journal of Infection in Developing Countries*. 2012;6(5):378-86.
22. Olowokure B, Hawker J, Weinberg J, Gill N, Sufi F. Deprivation and hospital admission for infectious intestinal diseases. *Lancet*. 1999;353(9155):807-8. doi:10.1016/S0140-6736(99)00611-X
23. Phillips G, Tam CC, Rodrigues LC, Lopman B. Risk factors for symptomatic and asymptomatic norovirus infection in the community. *Epidemiology and Infection*. 2011;139(11):1676-86. doi:<http://dx.doi.org/10.1017/S0950268810002839>
24. Pockett RD, Adlard N, Carroll S, Rajoriya F. Paediatric hospital admissions for rotavirus gastroenteritis and infectious gastroenteritis of all causes in England: an analysis of correlation with deprivation. *Current medical research and opinion*. 2011;27(4):777-84. doi:10.1185/03007995.2011.555757
25. Rose TC, Adams NL, Barr B, et al. Socioeconomic status is associated with symptom severity and sickness absence in people with infectious intestinal disease in the UK. *BMC Infect Dis*. 2017;17(1):447. doi:10.1186/s12879-017-2551-1
26. Adams NL, Rose TC, Hawker J, et al. Relationship between socioeconomic status and gastrointestinal infections in developed countries: A systematic review and meta-analysis. *PloS one*. 2018;13(1):e0191633. doi:10.1371/journal.pone.0191633
27. Adams NL, Byrne L, Smith GA, et al. Shiga Toxin-Producing *Escherichia coli* O157, England and Wales, 1983-2012. *Emerging Infectious Diseases*. 2016;22(4):590-7. doi:10.3201/eid2204.151485
28. Tserenpuntsag B, Chang H-G, Smith PF, Morse DL. Hemolytic uremic syndrome risk and *Escherichia coli* O157:H7. *Emerging Infectious Diseases*. 2005;11(12):1955-7.
- 279 Bell BP, Griffin PM, Lozano P, Christie DL, Kobayashi JM, Tarr PI. Predictors of hemolytic uremic syndrome in children during a large outbreak of *Escherichia coli* O157:H7 infections. *Pediatrics*. 1997;100(1):E12.
30. Rowe PC, Orrbine E, Lior H, et al. Risk of hemolytic uremic syndrome after sporadic *Escherichia coli* O157:H7 infection: results of a Canadian collaborative study. Investigators of the Canadian Pediatric Kidney Disease Research Center. *Journal of Pediatrics*. 1998;132(5):777-82.
31. Cimolai N, Basalyga S, Mah DG, Morrison BJ, Carter JE. A continuing assessment of risk factors for the development of *Escherichia coli* O157:H7-associated hemolytic uremic syndrome. *Clinical Nephrology*. 1994;42(2):85-9.
32. Chang H-GH, Tserenpuntsag B, Kacica M, Smith PF, Morse DL. Hemolytic uremic syndrome incidence in New York. *Emerging Infectious Diseases*. 2004;10(5):928-31.

## TABLES

Table 1: Characteristics of cohort participants by HUS status (n=1,059)

|                     |                         | No HUS<br>n (%) | HUS<br>n (%) |
|---------------------|-------------------------|-----------------|--------------|
| <b>Total</b>        |                         | 852 (80.5)      | 207 (19.6)   |
| <b>Age group</b>    | <1                      | 64 (91.4)       | 6 (8.6)      |
|                     | 1-4                     | 370 (76.1)      | 116 (23.9)   |
|                     | 5-9                     | 239 (80.7)      | 57 (19.3)    |
|                     | 10-15                   | 179 (86.5)      | 28 (13.5)    |
| <b>Sex</b>          | Female                  | 400 (77.5)      | 116 (22.5)   |
|                     | Male                    | 452 (83.2)      | 91 (16.8)    |
| <b>Age and Sex</b>  | Female <1               | 24 (85.7)       | 4 (14.3)     |
|                     | Female 1-4              | 171 (74.0)      | 60 (26.0)    |
|                     | Female 5-9              | 117 (79.1)      | 31 (20.9)    |
|                     | Female 10-15            | 88 (80.7)       | 21 (19.3)    |
|                     | Male <1                 | 40 (95.2)       | 2 (4.8)      |
|                     | Male 1-4                | 199 (78.0)      | 56 (22.0)    |
|                     | Male 5-9                | 122 (82.4)      | 26 (17.6)    |
|                     | Male 10-15              | 91 (92.9)       | 7 (7.1)      |
| <b>Ethnicity</b>    | White                   | 552 (80.5)      | 134 (19.5)   |
|                     | Non-white               | 138 (88.5)      | 18 (11.5)    |
|                     | Unknown                 | 162 (74.7)      | 55 (23.4)    |
| <b>IMD Quintile</b> | 1 (Least Disadvantaged) | 198 (80.8)      | 47 (19.2)    |
|                     | 2                       | 186 (84.2)      | 35 (15.8)    |
|                     | 3                       | 166 (75.8)      | 53 (24.2)    |
|                     | 4                       | 142 (76.8)      | 43 (23.2)    |
|                     | 5 (Most Disadvantaged)  | 160 (84.7)      | 29 (15.3)    |
| <b>Travel</b>       | Yes                     | 128 (85.3)      | 22 (14.7)    |
|                     | No                      | 724 (79.7)      | 185 (20.4)   |
| <b>Rurality</b>     | Rural                   | 230 (80.4)      | 56 (19.6)    |
|                     | Urban                   | 622 (80.5)      | 151 (19.5)   |
| <b>Region</b>       | East Midlands           | 65 (81.3)       | 15 (18.8)    |
|                     | East of England         | 57 (80.3)       | 14 (19.7)    |
|                     | London                  | 93 (81.6)       | 21 (18.4)    |
|                     | North East              | 64 (77.1)       | 19 (22.9)    |
|                     | North West              | 153 (77.7)      | 44 (22.3)    |
|                     | South East              | 92 (78.6)       | 25 (21.4)    |
|                     | South West              | 101 (75.9)      | 32 (24.1)    |
|                     | West Midlands           | 96 (84.2)       | 18 (15.8)    |
|                     | Yorkshire and Humber    | 131 (87.3)      | 19 (12.7)    |
| <b>Stx</b>          | Stx1                    | 17 (94.4)       | 1 (5.6)      |
|                     | Stx2                    | 609 (81.7)      | 136 (18.3)   |
|                     | Stx1+2                  | 219 (96.9)      | 7 (3.1)      |
|                     | Serology                | 7 (10.6)        | 59 (89.4)    |
|                     | Unknown                 | 0 (0.0)         | 4 (100.0)    |
| <b>Symptoms</b>     | Diarrhoea               | 803 (80.3)      | 197 (19.7)   |
|                     | Bloody diarrhoea        | 432 (74.0)      | 152 (26.0)   |
|                     | Nausea                  | 278 (75.8)      | 89 (24.3)    |
|                     | Vomiting                | 330 (66.1)      | 169 (33.9)   |
|                     | Abdominal pain          | 574 (78.2)      | 160 (21.8)   |

|                           |                          |            |            |
|---------------------------|--------------------------|------------|------------|
|                           | Fever                    | 273 (76.7) | 83 (23.3)  |
| <b>Healthcare contact</b> | Antibiotics              | 53 (40.8)  | 77 (59.2)  |
|                           | NHS Direct               | 67 (72.0)  | 26 (28.0)  |
|                           | GP                       | 570 (83.7) | 111 (16.3) |
|                           | A&E                      | 186 (66.9) | 92 (33.1)  |
|                           | Other healthcare contact | 98 (74.8)  | 33 (25.2)  |
|                           | Hospital                 | 223 (52.4) | 203 (47.6) |

HUS – haemolytic uraemic syndrome; *stx* – Shiga toxin; NHS Direct – National Health Service telephone advice line, now NHS 111; GP – General Practitioner; A&E – accident and emergency

Confidential: For Review Only



Table 2: Adjusted and unadjusted regression analysis (n=989)

| Variable                     | Category                | n (%)      | Unadjusted      |              | Adjusted <sup>a</sup> |                     | p value <sup>b</sup> |
|------------------------------|-------------------------|------------|-----------------|--------------|-----------------------|---------------------|----------------------|
|                              |                         |            | Odds Ratio      | (95% CI)     | Odds Ratio            | (95% CI)            |                      |
| <b>Age group</b>             | <1                      | 67 (6.8)   | 0.19            | (0.06-0.62)  | <b>0.21</b>           | <b>(0.05-0.82)</b>  | <b>0.03</b>          |
|                              | 1-4                     | 456 (46.1) | 1.0 (reference) |              | 1.0 (reference)       |                     |                      |
|                              | 5-9                     | 274 (27.7) | 0.62            | (0.40-0.94)  | <b>0.43</b>           | <b>(0.25-0.74)</b>  | <b>0.002</b>         |
|                              | 10-15                   | 192 (19.4) | 0.34            | (0.19-0.61)  | <b>0.20</b>           | <b>(0.09-0.43)</b>  | <b>&lt;0.001</b>     |
| <b>Sex</b>                   | Male                    | 513 (51.9) | 1.0 (reference) |              | 1.0 (reference)       |                     |                      |
|                              | Female                  | 476 (48.1) | 1.37            | (0.96-1.96)  | 1.38                  | (0.88-2.14)         | 0.16                 |
| <b>Ethnicity<sup>‡</sup></b> | White                   | 797 (80.6) | 1.0 (reference) |              | 1.0 (reference)       |                     |                      |
|                              | Non-White               | 192 (19.4) | 0.39            | (0.18-0.81)  | <b>0.28</b>           | <b>(0.11-0.74)</b>  | <b>0.01</b>          |
| <b>Travel</b>                | No                      | 850 (86.0) | 1.0 (reference) |              | 1.0 (reference)       |                     |                      |
|                              | Yes                     | 139 (14.0) | 0.46            | (0.24-0.88)  | 0.64                  | (0.28-1.45)         | 0.28                 |
| <b>Rurality</b>              | Urban                   | 719 (72.7) | 1.0 (reference) |              | 1.0 (reference)       |                     |                      |
|                              | Rural                   | 270 (27.3) | 1.21            | (0.82-1.77)  | 0.88                  | (0.52-1.48)         | 0.63                 |
| <b>IMD Quintile</b>          | 1 (least disadvantaged) | 231 (23.4) | 1.0 (reference) |              | 1.0 (reference)       |                     |                      |
|                              | 2                       | 210 (21.2) | 0.83            | (0.48-1.42)  | 0.64                  | (0.32-1.27)         | 0.20                 |
|                              | 3                       | 204 (20.6) | 1.28            | (0.77-2.12)  | 1.01                  | (0.54-1.91)         | 0.97                 |
|                              | 4                       | 170 (17.2) | 1.10            | (0.64-1.90)  | 1.10                  | (0.54-2.26)         | 0.79                 |
|                              | 5 (most disadvantaged)  | 174 (17.6) | 0.57            | (0.30-1.06)  | 0.57                  | (0.25-1.31)         | 0.18                 |
| <b>Region</b>                | East Midlands           | 72 (7.3)   | 0.62            | (0.24-1.59)  | 0.59                  | (0.18-1.92)         | 0.39                 |
|                              | East of England         | 66 (6.7)   | 1.03            | (0.44-2.42)  | 1.12                  | (0.37-3.37)         | 0.84                 |
|                              | London                  | 108 (10.9) | 1.0 (reference) |              | 1.0 (reference)       |                     |                      |
|                              | North East              | 76 (7.7)   | 1.19            | (0.53-2.64)  | 0.71                  | (0.26-1.97)         | 0.51                 |
|                              | North West              | 185 (18.7) | 1.20            | (0.63-2.31)  | 1.02                  | (0.44-2.37)         | 0.97                 |
|                              | South East              | 107 (10.8) | 1.09            | (0.52-2.28)  | 1.31                  | (0.48-3.63)         | 0.60                 |
|                              | South West              | 127 (12.8) | 1.48            | (0.75-2.93)  | 1.25                  | (0.50-3.13)         | 0.63                 |
|                              | West Midlands           | 104 (10.5) | 0.54            | (0.23-1.29)  | 0.53                  | (0.18-1.53)         | 0.24                 |
|                              | Yorkshire and Humber    | 144 (14.6) | 0.62            | (0.29-1.33)  | 0.52                  | (0.20-1.34)         | 0.17                 |
| <b>Stx</b>                   | Stx1+2                  | 226 (22.9) | 1.0 (reference) |              | 1.0 (reference)       |                     |                      |
|                              | Stx1                    | 18 (1.8)   | 1.84            | (0.21-15.84) | 5.53                  | (0.53-57.42)        | 0.15                 |
|                              | Stx2                    | 745 (75.3) | 6.99            | (3.22-15.17) | <b>5.92</b>           | <b>(2.49-14.10)</b> | <b>&lt;0.001</b>     |
| <b>Antibiotics</b>           | No                      | 887 (89.7) | 1.0 (reference) |              | 1.0 (reference)       |                     |                      |

|                         |     |            |                 |              |                 |                     |                  |
|-------------------------|-----|------------|-----------------|--------------|-----------------|---------------------|------------------|
|                         | Yes | 102 (10.3) | 8.54            | (5.48-13.30) | <b>8.46</b>     | <b>(4.71-15.18)</b> | <b>&lt;0.001</b> |
| <b>Diarrhoea</b>        | No  | 49 (5.0)   | 1.0 (reference) |              | 1.0 (reference) |                     |                  |
|                         | Yes | 940 (95.0) | 8.61            | (1.18-62.89) | 4.04            | (0.50-32.59)        | 0.19             |
| <b>Bloody diarrhoea</b> | No  | 440 (44.5) | 1.0 (reference) |              | 1.0 (reference) |                     |                  |
|                         | Yes | 549 (55.5) | 4.85            | (3.07-8.00)  | <b>3.56</b>     | <b>(2.04-6.24)</b>  | <b>&lt;0.001</b> |
| <b>Nausea</b>           | No  | 653 (66.0) | 1.0 (reference) |              | 1.0 (reference) |                     |                  |
|                         | Yes | 336 (34.0) | 1.52            | (1.06-2.18)  | 1.12            | (0.67-1.86)         | 0.66             |
| <b>Vomiting</b>         | No  | 549 (55.5) | 1.0 (reference) |              | 1.0 (reference) |                     |                  |
|                         | Yes | 440 (44.5) | 6.05            | (3.95-9.26)  | <b>4.47</b>     | <b>(2.62-7.63)</b>  | <b>&lt;0.001</b> |
| <b>Abdominal pain</b>   | No  | 309 (31.2) | 1.0 (reference) |              | 1.0 (reference) |                     |                  |
|                         | Yes | 680 (68.8) | 1.49            | (0.99-2.25)  | 0.82            | (0.46-1.46)         | 0.50             |
| <b>Fever</b>            | No  | 657 (66.4) | 1.0 (reference) |              | 1.0 (reference) |                     |                  |
|                         | Yes | 332 (33.6) | 1.50            | (1.05-2.16)  | 1.05            | (0.67-1.66)         | 0.82             |

<sup>a</sup>Adjusted for all other covariates in the model; <sup>b</sup>Statistical significance of relationship between HUS and each variable tested using  $\chi^2$  test ; *stx* – Shiga toxin gene; <sup>#</sup>Multiply imputed variable

1  
2  
3 **SUPPLEMENTARY DATA**  
4

5 Supplementary Table 1a: Clinical case definition for HUS  
6

7 

---

A child (aged <16 years of age) who has:  
8 

---

9 Acute kidney injury (AKI) defined by oligoanuria and/or elevated creatinine for age

10 AND

11  
12 Microangiopathic haemolytic anaemia (MAHA) defined by haemoglobin level <10 g/L with  
13 fragmented erythrocytes  
14

15 AND/OR

16 Thrombocytopenia defined by a platelet count of <130,000 × 10<sup>9</sup>/L  
17

18 WITHOUT septicaemia, malignant hypertension, chronic uraemia, or primary vascular disease  
19

20 

---

Elevated creatinine levels differed by age group and were those above the thresholds in Table 1  
21  
22  
23 

---

24  
25 Supplementary Table 1b: Creatinine level (micromol/L) thresholds by age group  
26

| 27<br>28<br>29 <b>Age Group</b> | 30<br>31 <b>Normal<br/>Creatinine<br/>threshold<br/>(micromol/L)</b> |
|---------------------------------|----------------------------------------------------------------------|
| 32 0-7 days                     | 100                                                                  |
| 33 8-14 days                    | 80                                                                   |
| 34 15-28 days                   | 55                                                                   |
| 35 1m-3 years                   | 40                                                                   |
| 36 4-6 years                    | 46                                                                   |
| 37 7-9 years                    | 56                                                                   |
| 38 10-12 years                  | 60                                                                   |
| 39 13-15 years                  | 80                                                                   |

40  
41  
42  
43  
44  
45  
46  
47  
48  
49  
50  
51  
52  
53  
54  
55  
56  
57  
58  
59  
60

Supplementary Table 2: Adjusted and unadjusted regression analysis - Sensitivity analysis excluding travel cases (n subjects=850)

| Variable     | Category                | n (%)      | Unadjusted      |              | Adjusted <sup>a</sup> |                      | p value          |
|--------------|-------------------------|------------|-----------------|--------------|-----------------------|----------------------|------------------|
|              |                         |            | Odds Ratio      | (95% CI)     | Odds Ratio            | (95% CI)             |                  |
| Age group    | <1                      | 55 (6.5)   | 0.14            | (0.03-0.59)  | <b>0.12</b>           | <b>(0.02-0.62)</b>   | <b>0.01</b>      |
|              | 1-4                     | 400 (47.1) | 1.0 (reference) |              | 1.0 (reference)       |                      |                  |
|              | 5-9                     | 242 (28.5) | 0.61            | (0.39-0.94)  | <b>0.45</b>           | <b>(0.25-0.79)</b>   | <b>0.005</b>     |
|              | 10-15                   | 153 (18.0) | 0.32            | (0.17-0.60)  | <b>0.17</b>           | <b>(0.07-0.39)</b>   | <b>&lt;0.001</b> |
| Sex          | Male                    | 445 (52.4) | 1.0 (reference) |              | 1.0 (reference)       |                      |                  |
|              | Female                  | 405 (47.7) | 1.31            | (0.91-1.90)  | 1.30                  | (0.81-2.08)          | 0.27             |
| Ethnicity    | White                   | 700 (82.4) | 1.0 (reference) |              | 1.0 (reference)       |                      |                  |
|              | Non-White               | 150 (17.6) | 0.41            | (0.20-0.83)  | <b>0.27</b>           | <b>(0.10-0.73)</b>   | <b>0.01</b>      |
| Rurality     | Urban                   | 606 (71.3) | 1.0 (reference) |              | 1.0 (reference)       |                      |                  |
|              | Rural                   | 244 (28.7) | 1.28            | (0.86-1.90)  | 1.07                  | (0.62-1.86)          | 0.80             |
| IMD Quintile | 1 (least disadvantaged) | 196 (23.1) | 1.0 (reference) |              | 1.0 (reference)       |                      |                  |
|              | 2                       | 184 (21.7) | 0.88            | (0.50-1.54)  | 0.75                  | (0.36-1.53)          | 0.43             |
|              | 3                       | 180 (21.2) | 1.24            | (0.73-2.10)  | 1.06                  | (0.54-2.10)          | 0.86             |
|              | 4                       | 150 (17.7) | 1.07            | (0.61-1.90)  | 1.14                  | (0.53-2.46)          | 0.74             |
|              | 5 (most disadvantaged)  | 140 (16.5) | 0.52            | (0.26-1.04)  | 0.57                  | (0.23-1.43)          | 0.23             |
| Region       | East Midlands           | 61 (7.2)   | 0.54            | (0.19-1.49)  | 0.49                  | (0.14-1.80)          | 0.29             |
|              | East of England         | 55 (6.5)   | 0.84            | (0.33-2.16)  | 1.02                  | (0.30-3.44)          | 0.98             |
|              | London                  | 83 (9.8)   | 1.0 (reference) |              | 1.0 (reference)       |                      |                  |
|              | North East              | 71 (8.4)   | 0.90            | (0.38-2.14)  | 0.59                  | (0.19-1.81)          | 0.35             |
|              | North West              | 172 (20.2) | 1.13            | (0.56-2.25)  | 1.06                  | (0.42-2.67)          | 0.90             |
|              | South East              | 73 (8.6)   | 1.27            | (0.58-2.86)  | 1.78                  | (0.57-5.56)          | 0.32             |
|              | South West              | 110 (12.9) | 1.38            | (0.66-2.86)  | 1.14                  | (0.42-3.11)          | 0.80             |
|              | West Midlands           | 95 (11.2)  | 0.52            | (0.21-1.26)  | 0.57                  | (0.18-1.78)          | 0.33             |
|              | Yorkshire and Humber    | 130 (15.3) | 0.59            | (0.27-1.32)  | 0.53                  | (0.19-1.47)          | 0.22             |
| Stx          | Stx1+2                  | 183 (21.5) | 1.0 (reference) |              | 1.0 (reference)       |                      |                  |
|              | Stx1                    | 8 (0.9)    | 4.21            | (0.45-39.89) | <b>24.71</b>          | <b>(1.86-328.34)</b> | <b>0.02</b>      |
|              | Stx2                    | 659 (77.5) | 6.97            | (3.02-16.10) | <b>6.08</b>           | <b>(2.32-15.92)</b>  | <b>&lt;0.001</b> |
| Antibiotics  | No                      | 766 (90.1) | 1.0 (reference) |              | 1.0 (reference)       |                      |                  |
|              | Yes                     | 84 (9.9)   | 10.0            | (6.18-16.32) | <b>10.89</b>          | <b>(5.65-20.97)</b>  | <b>&lt;0.001</b> |
| Diarrhea     | No                      | 48 (6.6)   | 1.0 (reference) |              | 1.0 (reference)       |                      |                  |
|              | Yes                     | 802 (94.4) | 9.26            | (1.27-67.70) | 4.00                  | (0.48-33.16)         | 0.20             |

1  
2  
3  
4  
5  
6  
7  
8  
9  
10  
11  
12  
13  
14  
15  
16  
17  
18  
19  
20  
21  
22  
23  
24  
25  
26  
27  
28  
29  
30  
31  
32  
33  
34  
35  
36  
37  
38  
39  
40  
41  
42  
43  
44  
45  
46

|                        |     |            |                 |              |                 |                    |                  |
|------------------------|-----|------------|-----------------|--------------|-----------------|--------------------|------------------|
| <b>Bloody diarrhea</b> | No  | 360 (42.4) | 1.0 (reference) |              | 1.0 (reference) |                    |                  |
|                        | Yes | 490 (57.7) | 5.10            | (3.10-8.38)  | <b>3.70</b>     | <b>(2.00-6.85)</b> | <b>&lt;0.001</b> |
| <b>Nausea</b>          | No  | 562 (66.1) | 1.0 (reference) |              | 1.0 (reference) |                    |                  |
|                        | Yes | 288 (33.9) | 1.52            | (1.04-2.22)  | 1.03            | (0.60-1.76)        | 0.92             |
| <b>Vomiting</b>        | No  | 465 (54.7) | 1.0 (reference) |              | 1.0 (reference) |                    |                  |
|                        | Yes | 385 (45.3) | 6.50            | (4.13-10.23) | <b>5.25</b>     | <b>(2.94-9.38)</b> | <b>&lt;0.001</b> |
| <b>Abdominal pain</b>  | No  | 259 (30.5) | 1.0 (reference) |              | 1.0 (reference) |                    |                  |
|                        | Yes | 591 (69.5) | 1.39            | (0.91-2.13)  | 0.73            | (0.39-1.36)        | 0.32             |
| <b>Fever</b>           | No  | 569 (66.9) | 1.0 (reference) |              | 1.0 (reference) |                    |                  |
|                        | Yes | 281 (33.1) | 1.71            | (1.17-2.50)  | 1.28            | (0.79-2.09)        | 0.32             |

aAdjusted for all other covariates in the model; *stx* – shiga toxin gene

Confidential: For Review Only

Supplementary Table 3: Adjusted and unadjusted regression analysis - Sensitivity analysis excluding ethnicity variable (n subjects=989)

| Variable     | Category                | n (%)      | Unadjusted      |              | Adjusted <sup>a</sup> |                     | p value          |
|--------------|-------------------------|------------|-----------------|--------------|-----------------------|---------------------|------------------|
|              |                         |            | Odds Ratio      | (95% CI)     | Odds Ratio            | (95% CI)            |                  |
| Age group    | <1                      | 67 (6.8)   | 0.19            | (0.06-0.62)  | <b>0.24</b>           | <b>(0.06-0.92)</b>  | <b>0.04</b>      |
|              | 1-4                     | 456 (46.1) | 1.0 (reference) |              | 1.0 (reference)       |                     |                  |
|              | 5-9                     | 274 (27.7) | 0.62            | (0.40-0.94)  | <b>0.45</b>           | <b>(0.26-0.76)</b>  | <b>0.003</b>     |
|              | 10-15                   | 192 (19.4) | 0.34            | (0.19-0.61)  | <b>0.22</b>           | <b>(0.11-0.47)</b>  | <b>&lt;0.001</b> |
| Sex          | Male                    | 513 (51.9) | 1.0 (reference) |              | 1.0 (reference)       |                     |                  |
|              | Female                  | 476 (48.1) | 1.37            | (0.96-1.96)  | 1.40                  | (0.91-2.16)         | 0.13             |
| Travel       | No                      | 850 (86.0) | 1.0 (reference) |              | 1.0 (reference)       |                     |                  |
|              | Yes                     | 139 (14.0) | 0.46            | (0.24-0.88)  | 0.58                  | (0.26-1.28)         | 0.18             |
| Rurality     | Urban                   | 719 (72.7) | 1.0 (reference) |              | 1.0 (reference)       |                     |                  |
|              | Rural                   | 270 (27.3) | 1.21            | (0.82-1.77)  | 0.97                  | (0.58-1.62)         | 0.90             |
| IMD Quintile | 1 (least disadvantaged) | 231 (23.4) | 1.0 (reference) |              | 1.0 (reference)       |                     |                  |
|              | 2                       | 210 (21.2) | 0.83            | (0.48-1.42)  | 0.65                  | (0.33-1.27)         | 0.21             |
|              | 3                       | 204 (20.6) | 1.28            | (0.77-2.12)  | 0.98                  | (0.51-1.79)         | 0.89             |
|              | 4                       | 170 (17.2) | 1.10            | (0.64-1.89)  | 0.96                  | (0.48-1.94)         | 0.91             |
|              | 5 (most disadvantaged)  | 174 (17.6) | 0.57            | (0.30-1.06)  | <b>0.41</b>           | <b>(0.19-0.90)</b>  | <b>0.03</b>      |
| Region       | East Midlands           | 72 (7.3)   | 0.62            | (0.24-1.59)  | 0.65                  | (0.21-2.02)         | 0.45             |
|              | East of England         | 66 (6.7)   | 1.03            | (0.44-2.42)  | 1.37                  | (0.47-4.00)         | 0.56             |
|              | London                  | 108 (10.9) | 1.0 (reference) |              | 1.0 (reference)       |                     |                  |
|              | North East              | 76 (7.7)   | 1.19            | (0.53-2.64)  | 1.02                  | (0.38-2.71)         | 0.97             |
|              | North West              | 185 (18.7) | 1.20            | (0.63-2.31)  | 1.29                  | (0.57-2.90)         | 0.54             |
|              | South East              | 107 (10.8) | 1.09            | (0.52-2.28)  | 1.74                  | (0.65-4.63)         | 0.27             |
|              | South West              | 127 (12.8) | 1.48            | (0.75-2.93)  | 1.64                  | (0.68-3.99)         | 0.27             |
|              | West Midlands           | 104 (10.5) | 0.54            | (0.23-1.29)  | 0.67                  | (0.24-1.86)         | 0.44             |
|              | Yorkshire and Humber    | 144 (14.6) | 0.62            | (0.29-1.33)  | 0.60                  | (0.24-1.52)         | 0.28             |
| Stx          | Stx1+2                  | 226 (22.9) | 1.0 (reference) |              | 1.0 (reference)       |                     |                  |
|              | Stx1                    | 18 (1.8)   | 1.84            | (0.21-15.84) | 5.34                  | (0.54-52.82)        | 0.15             |
|              | Stx2                    | 745 (75.3) | 6.99            | (3.22-15.17) | <b>5.76</b>           | <b>(2.43-13.67)</b> | <b>&lt;0.001</b> |
| Antibiotics  | No                      | 887 (89.7) | 1.0 (reference) |              | 1.0 (reference)       |                     |                  |
|              | Yes                     | 102 (10.3) | 8.54            | (5.48-13.30) | <b>7.46</b>           | <b>(4.27-13.03)</b> | <b>&lt;0.001</b> |
| Diarrhea     | No                      | 49 (5.0)   | 1.0 (reference) |              | 1.0 (reference)       |                     |                  |
|              | Yes                     | 940 (95.0) | 8.61            | (1.18-62.89) | 4.09                  | (0.51-32.47)        | 0.18             |

1  
2  
3  
4  
5  
6  
7  
8  
9  
10  
11  
12  
13  
14  
15  
16  
17  
18  
19  
20  
21  
22  
23  
24  
25  
26  
27  
28  
29  
30  
31  
32  
33  
34  
35  
36  
37  
38  
39  
40  
41  
42  
43  
44  
45  
46

|                        |     |            |                 |             |                 |                    |                  |
|------------------------|-----|------------|-----------------|-------------|-----------------|--------------------|------------------|
| <b>Bloody diarrhea</b> | No  | 440 (44.5) | 1.0 (reference) |             | 1.0 (reference) |                    |                  |
|                        | Yes | 549 (55.5) | 4.85            | (3.07-7.67) | <b>3.74</b>     | <b>(2.15-6.49)</b> | <b>&lt;0.001</b> |
| <b>Nausea</b>          | No  | 653 (66.0) | 1.0 (reference) |             | 1.0 (reference) |                    |                  |
|                        | Yes | 336 (34.0) | 1.52            | (1.06-2.18) | 1.11            | (0.67-1.83)        | 0.69             |
| <b>Vomiting</b>        | No  | 549 (55.5) | 1.0 (reference) |             | 1.0 (reference) |                    |                  |
|                        | Yes | 440 (44.5) | 6.05            | (3.95-9.26) | <b>4.38</b>     | <b>(2.59-7.40)</b> | <b>&lt;0.001</b> |
| <b>Abdominal pain</b>  | No  | 309 (31.2) | 1.0 (reference) |             | 1.0 (reference) |                    |                  |
|                        | Yes | 680 (68.8) | 1.49            | (0.99-2.25) | 0.83            | (0.47-1.46)        | 0.52             |
| <b>Fever</b>           | No  | 657 (66.4) | 1.0 (reference) |             | 1.0 (reference) |                    |                  |
|                        | Yes | 332 (33.6) | 1.50            | (1.05-2.16) | 1.04            | (0.66-1.63)        | 0.86             |

aAdjusted for all other covariates in the model; *stx* – shiga toxin gene

Supplementary Figure 1: Selection of participants to HUS Cohort Study

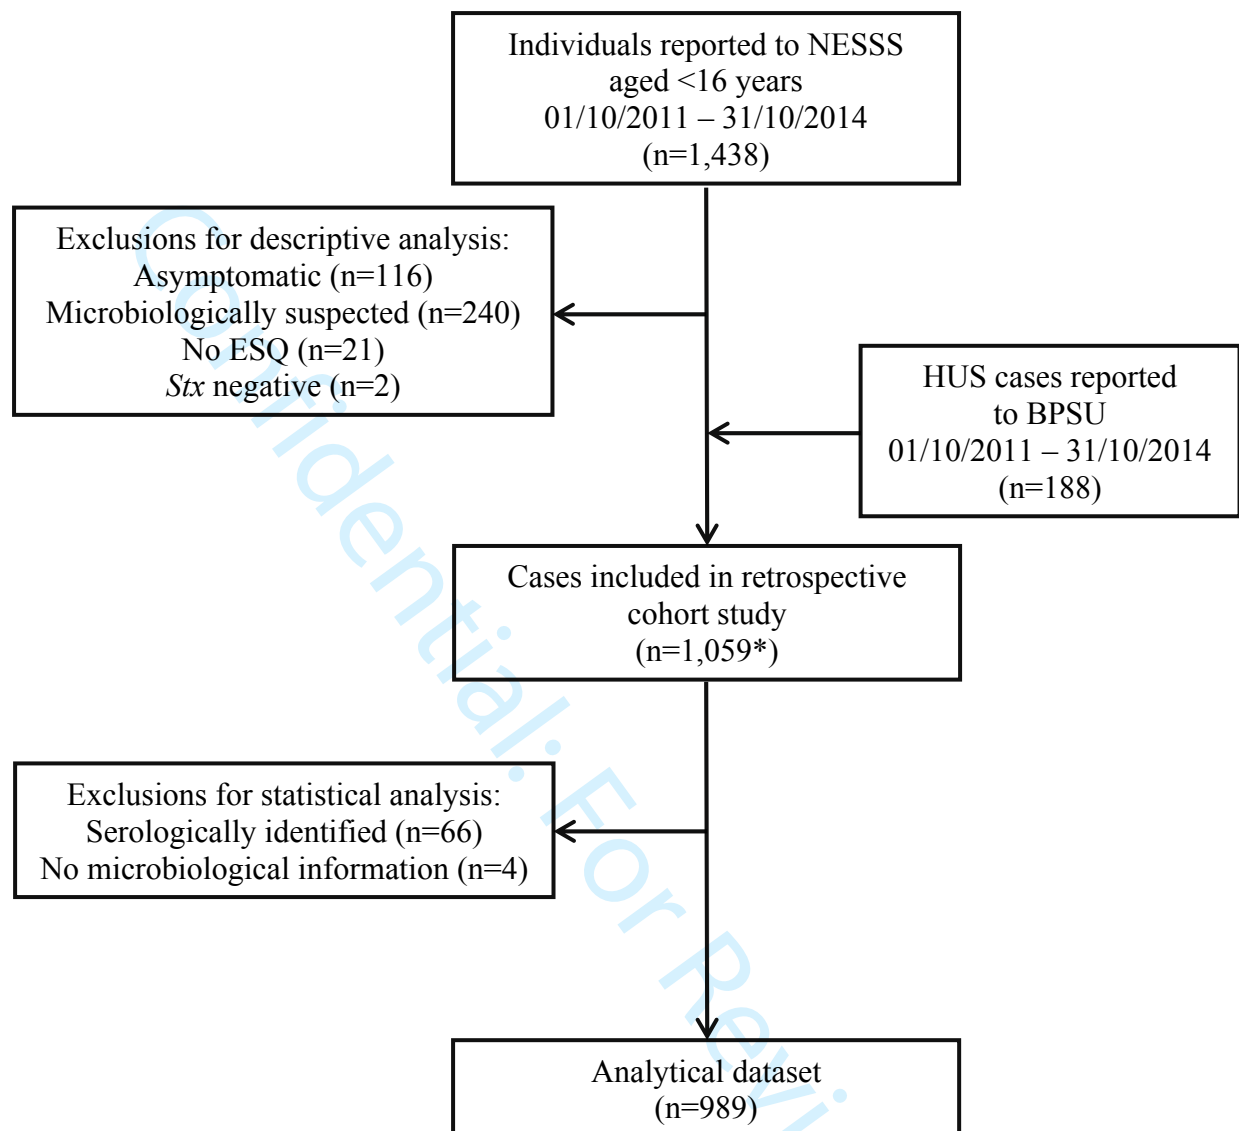

\*An additional 19 HUS cases not reported to BPSU were identified in NESSS; NESSS – National Enhanced Surveillance System for STEC; HUS – haemolytic uraemic syndrome; BPSU – British Paediatric Surveillance Unit; ESQ – enhanced surveillance questionnaire



STROBE Statement—Checklist of items that should be included in reports of *cohort studies*

|                              | Item No | Recommendation                                                                                                                                                                                                                                                                                                                                                                                                |
|------------------------------|---------|---------------------------------------------------------------------------------------------------------------------------------------------------------------------------------------------------------------------------------------------------------------------------------------------------------------------------------------------------------------------------------------------------------------|
| <b>Title and abstract</b>    | 1       | (a) Indicate the study's design with a commonly used term in the title or the abstract<br>(b) Provide in the abstract an informative and balanced summary of what was done and what was found                                                                                                                                                                                                                 |
| <b>Introduction</b>          |         |                                                                                                                                                                                                                                                                                                                                                                                                               |
| Background/rationale         | 2       | Explain the scientific background and rationale for the investigation being reported                                                                                                                                                                                                                                                                                                                          |
| Objectives                   | 3       | State specific objectives, including any prespecified hypotheses                                                                                                                                                                                                                                                                                                                                              |
| <b>Methods</b>               |         |                                                                                                                                                                                                                                                                                                                                                                                                               |
| Study design                 | 4       | Present key elements of study design early in the paper                                                                                                                                                                                                                                                                                                                                                       |
| Setting                      | 5       | Describe the setting, locations, and relevant dates, including periods of recruitment, exposure, follow-up, and data collection                                                                                                                                                                                                                                                                               |
| Participants                 | 6       | (a) Give the eligibility criteria, and the sources and methods of selection of participants. Describe methods of follow-up<br>(b) For matched studies, give matching criteria and number of exposed and unexposed                                                                                                                                                                                             |
| Variables                    | 7       | Clearly define all outcomes, exposures, predictors, potential confounders, and effect modifiers. Give diagnostic criteria, if applicable                                                                                                                                                                                                                                                                      |
| Data sources/<br>measurement | 8*      | For each variable of interest, give sources of data and details of methods of assessment (measurement). Describe comparability of assessment methods if there is more than one group                                                                                                                                                                                                                          |
| Bias                         | 9       | Describe any efforts to address potential sources of bias                                                                                                                                                                                                                                                                                                                                                     |
| Study size                   | 10      | Explain how the study size was arrived at                                                                                                                                                                                                                                                                                                                                                                     |
| Quantitative variables       | 11      | Explain how quantitative variables were handled in the analyses. If applicable, describe which groupings were chosen and why                                                                                                                                                                                                                                                                                  |
| Statistical methods          | 12      | (a) Describe all statistical methods, including those used to control for confounding<br>(b) Describe any methods used to examine subgroups and interactions<br>(c) Explain how missing data were addressed<br>(d) If applicable, explain how loss to follow-up was addressed<br>(e) Describe any sensitivity analyses                                                                                        |
| <b>Results</b>               |         |                                                                                                                                                                                                                                                                                                                                                                                                               |
| Participants                 | 13*     | (a) Report numbers of individuals at each stage of study—eg numbers potentially eligible, examined for eligibility, confirmed eligible, included in the study, completing follow-up, and analysed<br>(b) Give reasons for non-participation at each stage<br>(c) Consider use of a flow diagram                                                                                                               |
| Descriptive data             | 14*     | (a) Give characteristics of study participants (eg demographic, clinical, social) and information on exposures and potential confounders<br>(b) Indicate number of participants with missing data for each variable of interest<br>(c) Summarise follow-up time (eg, average and total amount)                                                                                                                |
| Outcome data                 | 15*     | Report numbers of outcome events or summary measures over time                                                                                                                                                                                                                                                                                                                                                |
| Main results                 | 16      | (a) Give unadjusted estimates and, if applicable, confounder-adjusted estimates and their precision (eg, 95% confidence interval). Make clear which confounders were adjusted for and why they were included<br>(b) Report category boundaries when continuous variables were categorized<br>(c) If relevant, consider translating estimates of relative risk into absolute risk for a meaningful time period |

|                          |    |                                                                                                                                                                            |
|--------------------------|----|----------------------------------------------------------------------------------------------------------------------------------------------------------------------------|
| Other analyses           | 17 | Report other analyses done—eg analyses of subgroups and interactions, and sensitivity analyses                                                                             |
| <b>Discussion</b>        |    |                                                                                                                                                                            |
| Key results              | 18 | Summarise key results with reference to study objectives                                                                                                                   |
| Limitations              | 19 | Discuss limitations of the study, taking into account sources of potential bias or imprecision. Discuss both direction and magnitude of any potential bias                 |
| Interpretation           | 20 | Give a cautious overall interpretation of results considering objectives, limitations, multiplicity of analyses, results from similar studies, and other relevant evidence |
| Generalisability         | 21 | Discuss the generalisability (external validity) of the study results                                                                                                      |
| <b>Other information</b> |    |                                                                                                                                                                            |
| Funding                  | 22 | Give the source of funding and the role of the funders for the present study and, if applicable, for the original study on which the present article is based              |

\*Give information separately for exposed and unexposed groups.

**Note:** An Explanation and Elaboration article discusses each checklist item and gives methodological background and published examples of transparent reporting. The STROBE checklist is best used in conjunction with this article (freely available on the Web sites of PLoS Medicine at <http://www.plosmedicine.org/>, Annals of Internal Medicine at <http://www.annals.org/>, and Epidemiology at <http://www.epidem.com/>). Information on the STROBE Initiative is available at <http://www.strobe-statement.org>.

# BMJ Paediatrics Open

## Sociodemographic and clinical risk-factors for paediatric typical haemolytic uraemic syndrome

|                               |                                                                                                                                                                                                                                                                                                                                                                                                                                                                                                                                                                                                                                                                                                                                                                                                                                                                                                                                                                                                                                                                                                                                                                                                                                                                                                                                                                                                                                                                                                                                                                                                                                                           |
|-------------------------------|-----------------------------------------------------------------------------------------------------------------------------------------------------------------------------------------------------------------------------------------------------------------------------------------------------------------------------------------------------------------------------------------------------------------------------------------------------------------------------------------------------------------------------------------------------------------------------------------------------------------------------------------------------------------------------------------------------------------------------------------------------------------------------------------------------------------------------------------------------------------------------------------------------------------------------------------------------------------------------------------------------------------------------------------------------------------------------------------------------------------------------------------------------------------------------------------------------------------------------------------------------------------------------------------------------------------------------------------------------------------------------------------------------------------------------------------------------------------------------------------------------------------------------------------------------------------------------------------------------------------------------------------------------------|
| Journal:                      | <i>BMJ Paediatrics Open</i>                                                                                                                                                                                                                                                                                                                                                                                                                                                                                                                                                                                                                                                                                                                                                                                                                                                                                                                                                                                                                                                                                                                                                                                                                                                                                                                                                                                                                                                                                                                                                                                                                               |
| Manuscript ID                 | bmjpo-2019-000465.R2                                                                                                                                                                                                                                                                                                                                                                                                                                                                                                                                                                                                                                                                                                                                                                                                                                                                                                                                                                                                                                                                                                                                                                                                                                                                                                                                                                                                                                                                                                                                                                                                                                      |
| Article Type:                 | Original article                                                                                                                                                                                                                                                                                                                                                                                                                                                                                                                                                                                                                                                                                                                                                                                                                                                                                                                                                                                                                                                                                                                                                                                                                                                                                                                                                                                                                                                                                                                                                                                                                                          |
| Date Submitted by the Author: | 07-Aug-2019                                                                                                                                                                                                                                                                                                                                                                                                                                                                                                                                                                                                                                                                                                                                                                                                                                                                                                                                                                                                                                                                                                                                                                                                                                                                                                                                                                                                                                                                                                                                                                                                                                               |
| Complete List of Authors:     | <p>Adams, Natalie; NIHR Health Protection Research Unit in Gastrointestinal Infections; Public Health England, National Infection Service</p> <p>Byrne, Lisa; Public Health England, National Infection Service</p> <p>Rose, Tanith; NIHR Health Protection Research Unit in Gastrointestinal Infections; University of Liverpool, Department of Public Health and Policy</p> <p>Adak, Bob; NIHR Health Protection Research Unit in Gastrointestinal Infections</p> <p>Jenkins, Claire; Public Health England, National Infection Service; NIHR Health Protection Research Unit in Gastrointestinal Infections</p> <p>Charlett, Andre; Public Health England, National Infection Service</p> <p>Violato, Mara; NIHR Health Protection Research Unit in Gastrointestinal Infections; University of Oxford, Health Economics Research Centre</p> <p>O'Brien, Sarah; NIHR Health Protection Research Unit in Gastrointestinal Infections; University of Liverpool, Department of Public Health and Policy</p> <p>Whitehead, Margaret; NIHR Health Protection Research Unit in Gastrointestinal Infections; University of Liverpool, Department of Public Health and Policy</p> <p>Barr, Benjamin; NIHR Health Protection Research Unit in Gastrointestinal Infections; University of Liverpool, Department of Public Health and Policy</p> <p>Taylor-Robinson, David; NIHR Health Protection Research Unit in Gastrointestinal Infections; University of Liverpool, Department of Public Health and Policy</p> <p>Hawker, Jeremy; NIHR Health Protection Research Unit in Gastrointestinal Infections; Public Health England, National Infection Service</p> |
| Keywords:                     | Epidemiology, Infectious Diseases                                                                                                                                                                                                                                                                                                                                                                                                                                                                                                                                                                                                                                                                                                                                                                                                                                                                                                                                                                                                                                                                                                                                                                                                                                                                                                                                                                                                                                                                                                                                                                                                                         |
|                               |                                                                                                                                                                                                                                                                                                                                                                                                                                                                                                                                                                                                                                                                                                                                                                                                                                                                                                                                                                                                                                                                                                                                                                                                                                                                                                                                                                                                                                                                                                                                                                                                                                                           |

SCHOLARONE™  
Manuscripts

**Title Page**

**Title:** Sociodemographic and clinical risk-factors for paediatric typical haemolytic uraemic syndrome: a retrospective cohort study

**Authors:**

Natalie L. Adams\*<sup>1,2,3</sup>, Lisa Byrne<sup>1,3</sup>, Tanith C. Rose<sup>1,2</sup>, Goutam K. Adak<sup>1</sup>, Claire Jenkins<sup>1,3</sup>, Andre Charlett<sup>3</sup>, Mara Violato<sup>1,4</sup>, Sarah J. O'Brien<sup>1,2</sup>, Margaret Whitehead<sup>1,2</sup>, Benjamin Barr<sup>1,2</sup>, David Taylor-Robinson<sup>1,2±</sup> and Jeremy Hawker<sup>1,3±</sup>

\*Corresponding author

± Joint senior authors

**Affiliations:**

<sup>1</sup>NIHR Health Protection Research Unit in Gastrointestinal Infections, UK

<sup>2</sup>Department of Public Health and Policy, University of Liverpool, UK

<sup>3</sup>National Infection Service, Public Health England, UK

<sup>4</sup>Health Economics Research Centre, University of Oxford, Oxford, UK

**Disclaimers:**

The research was funded by the National Institute for Health Research Health Protection Research Unit (NIHR HPRU) in Gastrointestinal Infections at University of Liverpool in partnership with Public Health England (PHE), in collaboration with University of East Anglia, University of Oxford and the Quadram Institute. Natalie Adams is based at the University of Liverpool and Public Health England. The views expressed are those of the

1  
2  
3 author(s) and not necessarily those of the NHS, the NIHR, the Department of Health or  
4  
5 Public Health England.  
6  
7

8 **Running title:**  
9

10  
11 Paediatric HUS in England 2011-2014  
12  
13

14  
15 **Corresponding author contact information:**  
16

17  
18 Dr Natalie L Adams, Gastrointestinal Infections Department, National Infection Service,  
19  
20 Public Health England, 61 Colindale Ave, Colindale NW9 5EQ, UK  
21

22  
23 [Natalie.Adams@phe.gov.uk](mailto:Natalie.Adams@phe.gov.uk)  
24  
25

26  
27  
28  
29 **Word count (abstract): 243/250**  
30

31  
32 **Word count (text): 2841/2500**  
33  
34

35 **References: 32/40**  
36  
37  
38  
39  
40  
41  
42  
43  
44  
45  
46  
47  
48  
49  
50  
51  
52  
53  
54  
55  
56  
57  
58  
59  
60

## ABSTRACT

### Objectives

Haemolytic Uraemic Syndrome (HUS) following Shiga toxin-producing *Escherichia coli* (STEC) infection is the commonest cause of acute renal failure among children in the United Kingdom. This study explored differential progression from STEC to HUS by social, demographic and clinical risk factors.

### Methods

We undertook a retrospective cohort study linking two datasets. We extracted data on paediatric STEC and HUS cases identified in the Public Health England National Enhanced Surveillance System for STEC and British Paediatric Surveillance Unit HUS surveillance from October 1 2011 to October 31 2014. Using logistic regression, we estimated the odds of HUS progression by risk factors.

### Results

1059 paediatric STEC cases were included in the study, of which 207 (19.55%, 95% CI 17-22%) developed HUS. In the fully-adjusted model, the odds of progression to HUS were highest in those aged 1-4 (OR 4.93, 95% CI 2.30-10.56, compared to 10-15 years), were infected with an stx2-only strain (OR 5.92, 95%CI 2.49-14.10), were prescribed antibiotics (OR 8.46, 95% CI 4.71-15.18), had bloody diarrhoea (OR 3.56, 95%CI 2.04-6.24) or vomiting (OR 4.47, 95%CI 2.62-7.63), but there was no association with progression to HUS by socioeconomic circumstances or rurality.

### Conclusion

1  
2  
3 Combining data from an active clinical surveillance system for HUS with the national  
4 enhanced STEC surveillance system suggests that 20% of diagnosed paediatric STEC  
5  
6 infections in England resulted in HUS No relationship was found with socioeconomic status  
7  
8 or rurality of cases, but differences were demonstrated by age, stx type and presenting  
9  
10 symptoms.  
11  
12  
13  
14  
15  
16  
17  
18

19 **Keywords:** Health inequalities; Shiga-toxin producing *Escherichia coli*; STEC; Haemolytic  
20  
21 Uraemic Syndrome; HUS  
22  
23  
24  
25  
26  
27  
28  
29  
30  
31  
32  
33  
34  
35  
36  
37  
38  
39  
40  
41  
42  
43  
44  
45  
46  
47  
48  
49  
50  
51  
52  
53  
54  
55  
56  
57  
58  
59  
60

## INTRODUCTION

Haemolytic uraemic syndrome (HUS) is a rare but serious complication of infection with Shiga toxin-producing *Escherichia coli* (STEC), affecting the blood, kidneys and, in the most severe cases, the central nervous system. Children and the elderly are considered to be the most susceptible age groups and HUS is recognised as the most common cause of acute renal failure among children in the United Kingdom (1). Strains of STEC encoding *stx2* toxin genes are more often associated with HUS than other strains (1-6). STEC serogroup O157 is the most frequently reported strain causing illness in England. Transmission to humans occurs through consumption of contaminated food or water, exposure to a contaminated environment involving direct or indirect contact with animals or their faeces and person-to-person spread.

It is estimated that progression to HUS following STEC infection could be as high as 15% in young children (2, 7). Several studies have suggested that development of HUS varies by some demographic characteristics; higher incidence of HUS has been documented in children (particularly aged 1-4), females (particularly aged over 10 years) and in those of White ethnicity (2, 6, 8-13); however few have documented progression to HUS by other demographic characteristics such as deprivation, foreign travel, rurality or region. There is evidence to suggest that those who are disadvantaged have a lower risk of STEC infection (14-16), and potentially a lower risk of progression to HUS outside of England (16,17), however no studies have looked at the relationship between SES, STEC and HUS in England. This study aims to investigate the relationship between demographic factors, STEC infection and subsequent development of HUS in a well-characterised paediatric population in England with high case-ascertainment.

## METHODS



### *Data, setting and source*

We undertook a retrospective cohort study linking two data sources; the Public Health England (PHE) National Enhanced Surveillance System for STEC (NESSS) and the British Paediatric Surveillance Unit (BPSU) HUS Study in conjunction with PHE. The linkage of two robust datasets, both of which can record HUS status, ensures high ascertainment of HUS cases. Firstly, we extracted data on STEC cases aged 0-15 years (inclusive) identified in NESSS during the period of the BPSU HUS Study (October 1 2011 to October 31 2014). All laboratory-confirmed STEC cases in England are reported by NHS laboratories to Public Health England staff who collect standardised data through an enhanced surveillance questionnaire (ESQ) as part of their public health response: this standardised dataset is collated centrally in NESSS for further validation and analysis. The ESQ collects detailed information on patient demographics, symptoms, food and water exposures and UK and non-UK travel during the exposure period (the week prior to illness onset). When a presumptive STEC is identified at the local laboratory or a case of HUS is identified, specimens are sent to PHE Gastrointestinal Bacteria Reference Unit (GBRU) for testing and patient ESQs are linked to microbiological results. Due to the timing of the ESQ administration in NESSS (which is designed to inform the acute public health response), this system can under-ascertain HUS as this can develop after completion of the questionnaire. This surveillance system is described in detail elsewhere (2).

Secondly, we extracted clinical data on paediatric (<16 years) HUS cases, collected by the BPSU HUS Study, an active surveillance system requiring regular returns from clinicians. Within this study, data were captured using a standardised questionnaire administered to paediatricians collecting information on; case demography; treatment history; microbiological investigations; clinical parameters of illness; clinical management of illness and status of the case at the time of data capture. Cases in the BPSU dataset were linked on

1  
2  
3 National Health Service (NHS) number, which was available for all cases, to those in the  
4  
5 NESS dataset to create a retrospective cohort. Supplementary Figure 1 provides details of  
6  
7 the selection of study participants.  
8  
9

10  
11 For statistical analysis, cases for whom no microbiological information was available (n=4)  
12  
13 and cases identified via serological testing only (n=66) were excluded in order to assess the  
14  
15 role of *stx* subtype. Ethnic groups, collected in five categories (White, Asian/Asian British,  
16  
17 Black/Black British, Mixed, Chinese) is not well-completed in NESS and therefore  
18  
19 responses were re-coded as White or non-White for analysis. The considerable missing data  
20  
21 for the ethnicity variable (19.1%) has led us to use the crude dichotomy of White/non-White  
22  
23 in this analysis. Multiple imputation using chained equations to impute values where  
24  
25 ethnicity (White/non-White) was missing. There will clearly be some loss of information  
26  
27 from doing this, and this precludes investigating risk differences between the non-White  
28  
29 ethnic groups . This may also slightly affect the confounding that exists between ethnicity  
30  
31 and socioeconomic status. Fifty imputed datasets were generated. The distribution of  
32  
33 ethnicity by age, sex and region was assessed to check the missing at random (MAR)  
34  
35 assumption. There was no difference in missing ethnicity by sex, however there were some  
36  
37 differences by age group (57.3% of cases with missing ethnicity were in the 1-4 age group;  
38  
39 n=114/199) and region (31.2% of cases with missing ethnicity were in London; n=62/199);  
40  
41 these were not regarded as problematic however as, given the observed data for other  
42  
43 variables, the missing data were considered independent.  
44  
45  
46  
47  
48  
49

### 50 51 *Ethics*

52  
53 Ethical approval was originally obtained for the main study (Ref: 11/LO/1412). As of  
54  
55 October 2010, HUS is a statutory reportable condition and this study falls under the existing  
56  
57 Health Protection Agency (now Public Health England) permissions under Section 251 of the  
58  
59  
60

1  
2  
3 NHS Act 2006. In addition, we received a favourable ethical opinion from the South East  
4  
5 Coast - Surrey Research Ethics Committee (15/LO/2138) on 1 December 2015 covering the  
6  
7 use of this dataset for this study.  
8  
9

### 10 *Patient involvement*

11  
12  
13  
14 Patients were not directly involved in the design of this study.  
15  
16

### 17 *Outcome and exposures*

18  
19  
20 The outcome of interest was HUS, determined by the case meeting the BPSU clinical criteria  
21  
22 (See supplementary Table 1) (18) or completion of the HUS field in the ESQ. Covariates in  
23  
24 the analysis were age group (<1, 1-4, 5-9, 10-15 years); sex (male/female); ethnicity  
25  
26 (White/non-White); travel (yes/no); rurality (rural/urban); microbiology (Shiga-toxin (*Stx*));  
27  
28 antibiotic use (yes/no); clinical symptoms (diarrhoea, bloody diarrhoea, nausea, vomiting,  
29  
30 abdominal pain, fever) and region of residence. The *stx* type, the primary STEC virulence  
31  
32 factor, was used as the main microbiological variable (19). Where symptoms, travel status  
33  
34 and healthcare contact variables were blank or unknown, these were recoded as a negative  
35  
36 response. As a proxy for childhood socioeconomic circumstances (SECs) we used a small-  
37  
38 area deprivation measure, the Index of Multiple Deprivation 2010 (IMD) (20), assigned to  
39  
40 each case based on their postcode and divided into population-level quintiles, with the first  
41  
42 quintile representing the least deprived and the fifth quintile representing the most deprived.  
43  
44  
45  
46  
47

### 48 *Analysis strategy*

49  
50  
51 Comparisons of proportions were tested using the chi-squared test. We explored univariate  
52  
53 relationships between progression to HUS and the covariates of interest before fitting a  
54  
55 multivariate logistic regression model. All variables were retained in this model in order to  
56  
57 control for any potential confounding. Interaction terms between variables (IMD, ethnicity,  
58  
59  
60

1  
2  
3 age and sex) were tested to investigate whether the strength of any relationship was  
4  
5 moderated by the inclusion of another variable. Analyses were conducted in Stata 13.1  
6  
7 (Statacorp, Texas).  
8  
9

### 10 *Robustness tests*

11  
12 We performed multiple sensitivity analyses to test the validity of the main analysis; first by  
13  
14 (i) excluding cases that were likely to have a travel-acquired STEC infection (date of onset is  
15  
16 within one exposure period, 7 days, of having returned from outside of the UK) and (ii)  
17  
18 separately excluding cases with unknown ethnicity to determine whether there were  
19  
20 differences in progression to HUS by SECs for children who travelled abroad during their  
21  
22 incubation period compared to those who did not or those with ethnicity recorded and those  
23  
24 without respectively.  
25  
26  
27  
28  
29  
30

## 31 **RESULTS**

### 32 *Descriptive analysis*

33  
34 Of 1059 paediatric STEC cases included in the study, 207 (19.55%, 95% CI 17.27%-22.04%)  
35  
36 developed HUS. Progression to HUS varied by age and gender (Table 1), the highest was  
37  
38 observed in females aged 1-4 years (26.0%). A higher proportion of progression to HUS was  
39  
40 observed in females aged 10-15 years compared to males of the same age (19.3%, 95% CI  
41  
42 12.3-27.9 versus 7.1%, 95% CI 2.9-14.2,  $p=0.01$ ), and amongst females aged less than 1 year  
43  
44 compared to males of the same age, although this was not significant (14.3%, 95% CI 4.0-  
45  
46 32.7 versus 4.8%, 95% CI 0.6-16.2,  $p=0.16$ ). Although progression to HUS was higher in the  
47  
48 least disadvantaged quintile (47/245, 19.2%, 95% CI 14.4-24.7%) compared with the most  
49  
50 disadvantaged quintile (29/189, 15.3%, 95% CI 10.5-21.3%) this difference was not  
51  
52 statistically significant ( $p=0.29$ ). The highest proportion progressing to HUS was in quintile 3  
53  
54  
55  
56  
57  
58  
59  
60

(53/219, 24.2%, 95% CI 18.7-30.4%) and there was no clear pattern across the 5 quintiles (p=0.07; quintile 2 - 35/221, 15.8%, 95% CI 11.3-21.3%; quintile 4 - 43/185, 23.2%, 95% CI 17.4-30%).

### *Multivariable analysis*

In the fully adjusted model (Table 2), there were significantly lower odds of HUS amongst <1, 5-9 and 10-15 year olds compared to 1-4 year olds and significantly higher odds of HUS amongst those infected with *stx2*-only strains, those prescribed antibiotics and among those who had experienced bloody diarrhoea or vomiting . The most disadvantaged children had lower odds of progression to HUS compared to the least disadvantaged children (OR 0.57, 95% CI 0.25-1.31) but the difference was not significant. There was no statistically significant difference in risk by rurality (OR 0.88, 95% CI 0.52-1.48) or by region (Table 2). There were no significant interactions identified (data not shown).

The sensitivity analyses conducted to assess the robustness of the findings did not alter the overall conclusions of this research (Supplementary Tables 2 and 3).

## **DISCUSSION**

In a novel linkage and analysis of two datasets with high case-ascertainment to explore the role of demographic and socioeconomic factors in the development of HUS following STEC infection, we found progression from STEC infection to HUS to be 20% in this paediatric cohort in England. Odds of HUS progression varied by age, *stx* type, antibiotic exposure and clinical presentation, with children aged 1-4 years infected with *stx2*-only, with reported antibiotic exposure and presenting with bloody diarrhoea or vomiting at highest risk. Few studies have explored the social patterning of risk factors for STEC (21) or the socio-demographic risk factors associated with progression to HUS, and no such studies have been

1  
2  
3 undertaken in England. We found no relationship between progression to HUS and  
4  
5 socioeconomic status in children in this study.  
6  
7

8  
9 Our study has several strengths. This study captures the progression of HUS in a well-  
10  
11 characterised paediatric STEC population. To the best of our knowledge, as confirmed by a  
12  
13 prior review of the literature and discussion with national experts, this is the first study to  
14  
15 combine a prospective active surveillance system and a multisource national surveillance  
16  
17 system to study the risk factors for HUS and as such is likely to have better case-  
18  
19 ascertainment of HUS than previous studies and is related to good STEC denominators.  
20  
21 Furthermore, this study makes use of one of the largest cohorts of HUS cases. The results of  
22  
23 this study are likely to be generalisable to other high-income countries with a similar pattern  
24  
25 of STEC infection. Despite this, there are some limitations. It is possible that there is residual  
26  
27 confounding that could not be controlled for, such as intrinsic childhood characteristics which  
28  
29 may increase differential vulnerability or susceptibility by SEC such as genetic  
30  
31 predisposition, co-morbidities, and clinical or treatment characteristics. Further, as an area-  
32  
33 level measure of SEC was used, it is possible that it may not have been sensitive enough to  
34  
35 detect the effect of socioeconomic inequalities, particularly if individual factors rather than  
36  
37 area-level factors have more influence over the risk of acquiring more severe strains of STEC  
38  
39 with increased risk of progression to HUS. However, person-to-person spread is an important  
40  
41 risk factor for GI infections and, although there is a risk of ecological fallacy, area-level  
42  
43 measures have the advantage of including potential environmental factors such as housing  
44  
45 and living environment deprivation which are likely to be important factors in considering  
46  
47 individual risk of infection. Excluding individuals with a serological result only from the  
48  
49 statistical analysis may introduce a potential bias leading to an underestimate of HUS  
50  
51 incidence, which may be important if there are geographical or host-factors which are linked  
52  
53 to severity of illness, although the number of serology-only diagnoses was small. In England,  
54  
55  
56  
57  
58  
59  
60

1  
2  
3 most diagnosed cases of STEC are of serogroup O157 (95% in our study), and it is possible  
4 that our results may be biased towards the relationship between STEC O157 and progression  
5 to HUS, which may differ if other, possibly less pathogenic, serogroups predominate. It is  
6 possible however, that the risk of progression to HUS could be different in populations  
7 exposed to STEC organisms with a lower proportion of stx2-only producing strains, or with a  
8 different age distribution of cases. There were also some missing data in our study,  
9 particularly for ethnicity, which we addressed using multiple imputation. The binary ethnicity  
10 variable used (White/non-White) was also crude and adopted because of data quality issues in  
11 NESSS for this variable. However, a previous study using this data (2) demonstrated  
12 differences in risk of STEC between White and non-White ethnic groups (RR 1.43,  $p < 0.001$ )  
13 and so was important to assess in our study although its inclusion may mask differences in  
14 socioeconomic status. No data were available on whether the children included in our study  
15 had underlying or chronic conditions which may be related to their risk of developing HUS.  
16 Finally, it was not always possible to determine whether antibiotics had been prescribed  
17 during treatment for STEC infection or following a diagnosis of HUS therefore the relevant  
18 association should be interpreted with caution.  
19  
20  
21  
22  
23  
24  
25  
26  
27  
28  
29  
30  
31  
32  
33  
34  
35  
36  
37  
38  
39  
40

41 The finding of 19.5% (95% CI 17-22%) of diagnosed STEC cases progressing to HUS is  
42 higher than previous studies, which have estimated the proportion of paediatric cases of  
43 STEC O157 progressing to HUS to be 15% (95% CI 11-19%) in females aged 1-4 years in  
44 England (2) and 15.3% (95% CI 13-18%) in children aged  $< 5$  years in the USA (7). Our  
45 study uses data derived from two linked surveillance systems providing high ascertainment of  
46 both STEC and HUS cases which provides a more robust estimate. It is likely that there will  
47 also be a bias resulting from ascertainment of STEC cases from laboratory specimens, as  
48 milder cases of gastrointestinal infection are less likely to be microbiologically tested, but this  
49 will also be true of previous published studies.  
50  
51  
52  
53  
54  
55  
56  
57  
58  
59  
60

1  
2  
3 Whilst rurality has been reported as an important factor in risk for STEC infection (2, 14), our  
4 study suggests that rurality is not a significant driver of progression to HUS. It is important to  
5 note that there are environmental factors, such as cattle density, that were not included in this  
6 study and which may be more important factors in risk of STEC infection. Our finding that  
7 rurality was not linked to progression to HUS following STEC infection may also be due to  
8 the majority of our cases (95%) being STEC O157 – this finding may be different in more  
9 heterogenous dataset from countries with greater variability by serogroup. Similarly, despite  
10 evidence to suggest that the risk and consequences of GI infections in general are greater for  
11 disadvantaged children (22-26) – the finding in our study suggests that lower childhood SEC  
12 is unlikely to be a contributor for development of HUS.  
13  
14  
15  
16  
17  
18  
19  
20  
21  
22  
23  
24  
25  
26

27 Previous studies in England have suggested that children aged 1-4 years, females and white  
28 ethnic groups have the highest incidence of STEC infection (2, 27). Our study echoes the  
29 findings by Milford et al (6) which demonstrated higher progression to HUS amongst  
30 children aged 1-4 years. No overall difference in risk of HUS by sex was identified in our  
31 study, a finding echoed in several other previous studies (28-31); this is an area of  
32 disagreement in the literature with several studies finding higher risk amongst women (7, 17,  
33 32) although two of these studies finding higher risk in women did not look specifically  
34 among children (7, 32). We did find differences in risk by sex within specific age groups,  
35 with a greater proportion of progression to HUS amongst girls less than 1 year of age and 10-  
36 15 years of age compared to boys of the same age groups (Table 1), although no significant  
37 interaction between age and sex could be identified. The reasons for the differential risk by  
38 age are currently unclear and call for a deeper understanding of differences in risks and  
39 exposures between these groups.  
40  
41  
42  
43  
44  
45  
46  
47  
48  
49  
50  
51  
52  
53  
54  
55  
56

57 The association between clinical presentation with vomiting and bloody diarrhoea and  
58 increased risk of HUS reported in this study has been identified previously (12) and, as such,  
59  
60



1  
2  
3 the presence of these symptoms particularly in paediatric STEC cases should evoke a high  
4  
5 level of clinical suspicion for the potential development of HUS.  
6  
7

8  
9 Our study quantifies the proportion of paediatric STEC cases progressing to HUS in a well –  
10  
11 defined population with high ascertainment. It also quantifies the risk factors associated with  
12  
13 progression to HUS in terms of sociodemographic characteristics as well as clinical  
14  
15 presentation. Further research is warranted to elucidate the populations at risk of STEC  
16  
17 infection and HUS in terms of deprivation, ethnicity, age and sex, in order to better  
18  
19 understand whether there are real differences in risk or artefacts of surveillance.  
20  
21  
22

## 23 **FUNDING**

24  
25  
26 The research was funded by the National Institute for Health Research Health Protection  
27  
28 Research Unit (NIHR HPRU) in Gastrointestinal Infections [grant number NIHR HPRU  
29  
30 201210,038] at University of Liverpool in partnership with Public Health England (PHE), in  
31  
32 collaboration with University of East Anglia, University of Oxford and the Quadram  
33  
34 Institute. Natalie Adams is based at the University of Liverpool and Public Health England.  
35  
36 The views expressed are those of the author(s) and not necessarily those of the NHS, the  
37  
38 NIHR, the Department of Health and Social Care or Public Health England. David Taylor-  
39  
40 Robinson is funded by the MRC on a Clinician Scientist Fellowship (MR/P008577/1). Ben  
41  
42 Barr and Tanith Rose were also supported by the National Institute for Health Research  
43  
44 (NIHR) Collaboration for Leadership in Health Research and Care (CLAHRC NWC).  
45  
46  
47  
48  
49

## 50 **CONFLICT OF INTEREST**

51  
52  
53 All authors: No potential conflicts of interest.  
54  
55

## 56 **ACKNOWLEDGMENTS**

1  
2  
3 This work was funded by the National Institute for Health Research Health Protection  
4  
5 Research Unit in Gastrointestinal Infections. The authors would like to thank Kirsten Glen  
6  
7 and Naomi Launders for their work on the National Enhanced Surveillance System for STEC,  
8  
9  
10 Ross Harris for statistical advice and Richard Lynn at the British Paediatric Surveillance Unit  
11  
12 for facilitating the BPSU HUS study.  
13  
14

### 15 **CONFLICT OF INTEREST**

16  
17  
18 The authors declare that they have no conflicts of interest.  
19  
20  
21

### 22 **CONTRIBUTORSHIP STATEMENT**

23  
24  
25 All authors contributed to the conception and design of the study. LB, CJ and GK collated  
26  
27 and curated the dataset and provided guidance on interpretation of data. NA performed the  
28  
29 analyses with guidance from AC, LB, BB, JH and DTR. NA, JH, DTR, MV, SJOB and MM  
30  
31 drafted the manuscript which was critically revised by all authors. All authors approved the  
32  
33 final version of the manuscript. NA submitted the manuscript. JH and DTR are joint senior  
34  
35 authors.  
36  
37  
38  
39  
40  
41  
42  
43  
44  
45  
46  
47  
48  
49  
50  
51  
52  
53  
54  
55  
56  
57  
58  
59  
60

### WHAT IS ALREADY KNOWN ON THIS TOPIC

- HUS is recognised as the most common cause of acute renal failure among children in the United Kingdom.
- It is estimated that progression to HUS following STEC infection could be as high as 15% in young children.
- Several studies have suggested that development of HUS varies by demographic characteristics however few have documented progression to HUS by demographic characteristics.

### WHAT THIS STUDY ADDS

- A fifth of paediatric STEC cases developed the serious complication of haemolytic uraemic syndrome in England.
- This figure is higher than previously reported in England, and varied by demographic and clinical factors
- Socioeconomic factors did not influence progression to SES.

## REFERENCES

1. Lynn RM, O'Brien SJ, Taylor CM, et al. Childhood hemolytic uremic syndrome, United Kingdom and Ireland. *Emerging Infectious Diseases*. 2005;11(4):590-6. doi:10.3201/eid1104.040833
2. Byrne L, Jenkins C, Launders N, Elson R, Adak GK. The epidemiology, microbiology and clinical impact of Shiga toxin-producing *Escherichia coli* in England, 2009-2012. *Epidemiology and Infection*. 2015;1-13. doi:10.1017/S0950268815000746
3. Ethelberg S, Olsen KE, Scheutz F, et al. Virulence factors for hemolytic uremic syndrome, Denmark. *Emerging Infectious Diseases*. 2004;10(5):842-7. doi:10.3201/eid1005.030576
4. Persson S, Olsen KE, Ethelberg S, Scheutz F. Subtyping method for *Escherichia coli* shiga toxin (verocytotoxin) 2 variants and correlations to clinical manifestations. *J Clin Microbiol*. 2007;45(6):2020-4. doi:10.1128/JCM.02591-06
5. Dallman TJ, Ashton PM, Byrne L, et al. Applying phylogenomics to understand the emergence of Shiga-toxin-producing *Escherichia coli* O157:H7 strains causing severe human disease in the UK. *Microbial Genomics*. 2015;1(3). doi:doi:10.1099/mgen.0.000029
6. Milford DV, Taylor CM, Guttridge B, Hall SM, Rowe B, Kleanthous H. Haemolytic uraemic syndromes in the British Isles 1985-8: association with verocytotoxin producing *Escherichia coli*. Part 1: Clinical and epidemiological aspects. *Archives of Disease in Childhood*. 1990;65(7):716-21.
7. Gould LH, Demma L, Jones TF, et al. Hemolytic uremic syndrome and death in persons with *Escherichia coli* O157:H7 infection, foodborne diseases active surveillance network sites, 2000-2006. *Clinical Infectious Diseases*. 2009;49(10):1480-5. doi:10.1086/644621
8. Kinney JS, Gross TP, Porter CC, Rogers MF, Schonberger LB, Hurwitz ES. Hemolytic-uremic syndrome: a population-based study in Washington, DC and Baltimore, Maryland. *American Journal of Public Health*. 1988;78(1):64-5.
9. Rogers MF, Rutherford GW, Alexander SR, et al. A population-based study of hemolytic-uremic syndrome in Oregon, 1979-1982. *American Journal of Epidemiology*. 1986;123(1):137-42.
10. Tarr PI, Hickman RO. Hemolytic uremic syndrome epidemiology: a population-based study in King County, Washington, 1971 to 1980. *Pediatrics*. 1987;80(1):41-5.
11. Bell WR. Thrombotic thrombocytopenic purpura/hemolytic uremic syndrome relapse: frequency, pathogenesis, and meaning. *Seminars in hematology*. 1997;34(2):134-9.
12. Launders N, Byrne L, Jenkins C, Harker K, Charlett A, Adak GK. Disease severity of Shiga toxin-producing *E. coli* O157 and factors influencing the development of typical haemolytic uraemic syndrome: a retrospective cohort study, 2009-2012. *BMJ open*. 2016;6(1). doi:10.1136/bmjopen-2015-009933
13. Elliott EJ, Robins-Browne RM, O'Loughlin EV, et al. Nationwide study of haemolytic uraemic syndrome: clinical, microbiological, and epidemiological features. *Arch Dis Child*. 2001;85:125-31.
14. Chang M, Groseclose SL, Zaidi AA, Braden CR. An ecological analysis of sociodemographic factors associated with the incidence of salmonellosis, shigellosis, and *E. coli* O157:H7 infections in US counties. *Epidemiology and Infection*. 2009;137(6):810-20. doi:10.1017/s0950268808001477
15. Jalava K, Ollgren J, Eklund M, Siitonen A, Kuusi M. Agricultural, socioeconomic and environmental variables as risks for human verotoxigenic *Escherichia coli* (VTEC) infection in Finland. *BMC Infect Dis*. 2011;11:275. doi: <http://dx.doi.org/10.1186/1471-2334-11-275>. PubMed PMID: 22008456; PubMed Central PMCID: PMC3226588.

16. Whitney BM, Mainero C, Humes E, Hurd S, Niccolai L, Hadler JL. Socioeconomic status and foodborne pathogens in Connecticut, USA, 2000–2011. *Emerging Infectious Diseases*. 2015;21(9):1617-24. doi: 10.3201/eid2109.150277.
17. Rowe PC, Orrbine E, Wells GA, McLaine PN. Epidemiology of hemolytic-uremic syndrome in Canadian children from 1986 to 1988. The Canadian Pediatric Kidney Disease Reference Centre. *Journal of Pediatrics*. 1991;119(2):218-24.
18. Byrne L, on behalf of the BPSU HUS Study Team. BPSU HUS Study Report. 2017.
19. Ethelberg S, Olsen KE, Scheutz F, et al. Virulence factors for hemolytic uremic syndrome, Denmark. *Emerg Infect Dis*. 2004;10(5):842-7. doi:10.3201/eid1005.030576
20. Department for Communities and Local Government. English Indices of Deprivation 2010. Department for Communities and Local Government. 2011. [https://www.gov.uk/government/uploads/system/uploads/attachment\\_data/file/6871/1871208.pdf](https://www.gov.uk/government/uploads/system/uploads/attachment_data/file/6871/1871208.pdf). Accessed 16/09/2016.
21. Bentancor AB, Ameal LA, Calvino MF, Martinez MC, Miccio L, Degregorio OJ. Risk factors for Shiga toxin-producing *Escherichia coli* infections in preadolescent schoolchildren in Buenos Aires, Argentina. *Journal of Infection in Developing Countries*. 2012;6(5):378-86.
22. Olowokure B, Hawker J, Weinberg J, Gill N, Sufi F. Deprivation and hospital admission for infectious intestinal diseases. *Lancet*. 1999;353(9155):807-8. doi:10.1016/S0140-6736(99)00611-X
23. Phillips G, Tam CC, Rodrigues LC, Lopman B. Risk factors for symptomatic and asymptomatic norovirus infection in the community. *Epidemiology and Infection*. 2011;139(11):1676-86. doi:<http://dx.doi.org/10.1017/S0950268810002839>
24. Pockett RD, Adlard N, Carroll S, Rajoriya F. Paediatric hospital admissions for rotavirus gastroenteritis and infectious gastroenteritis of all causes in England: an analysis of correlation with deprivation. *Current medical research and opinion*. 2011;27(4):777-84. doi:10.1185/03007995.2011.555757
25. Rose TC, Adams NL, Barr B, et al. Socioeconomic status is associated with symptom severity and sickness absence in people with infectious intestinal disease in the UK. *BMC Infect Dis*. 2017;17(1):447. doi:10.1186/s12879-017-2551-1
26. Adams NL, Rose TC, Hawker J, et al. Relationship between socioeconomic status and gastrointestinal infections in developed countries: A systematic review and meta-analysis. *PloS one*. 2018;13(1):e0191633. doi:10.1371/journal.pone.0191633
27. Adams NL, Byrne L, Smith GA, et al. Shiga Toxin-Producing *Escherichia coli* O157, England and Wales, 1983-2012. *Emerging Infectious Diseases*. 2016;22(4):590-7. doi:10.3201/eid2204.151485
28. Tserenpuntsag B, Chang H-G, Smith PF, Morse DL. Hemolytic uremic syndrome risk and *Escherichia coli* O157:H7. *Emerging Infectious Diseases*. 2005;11(12):1955-7.
- 279 Bell BP, Griffin PM, Lozano P, Christie DL, Kobayashi JM, Tarr PI. Predictors of hemolytic uremic syndrome in children during a large outbreak of *Escherichia coli* O157:H7 infections. *Pediatrics*. 1997;100(1):E12.
30. Rowe PC, Orrbine E, Lior H, et al. Risk of hemolytic uremic syndrome after sporadic *Escherichia coli* O157:H7 infection: results of a Canadian collaborative study. Investigators of the Canadian Pediatric Kidney Disease Research Center. *Journal of Pediatrics*. 1998;132(5):777-82.
31. Cimolai N, Basalyga S, Mah DG, Morrison BJ, Carter JE. A continuing assessment of risk factors for the development of *Escherichia coli* O157:H7-associated hemolytic uremic syndrome. *Clinical Nephrology*. 1994;42(2):85-9.
32. Chang H-GH, Tserenpuntsag B, Kacica M, Smith PF, Morse DL. Hemolytic uremic syndrome incidence in New York. *Emerging Infectious Diseases*. 2004;10(5):928-31.

## TABLES

Table 1: Characteristics of cohort participants by HUS status (n=1,059)

|                     |                         | No HUS<br>n (%) | HUS<br>n (%) |
|---------------------|-------------------------|-----------------|--------------|
| <b>Total</b>        |                         | 852 (80.5)      | 207 (19.6)   |
| <b>Age group</b>    | <1                      | 64 (91.4)       | 6 (8.6)      |
|                     | 1-4                     | 370 (76.1)      | 116 (23.9)   |
|                     | 5-9                     | 239 (80.7)      | 57 (19.3)    |
|                     | 10-15                   | 179 (86.5)      | 28 (13.5)    |
| <b>Sex</b>          | Female                  | 400 (77.5)      | 116 (22.5)   |
|                     | Male                    | 452 (83.2)      | 91 (16.8)    |
| <b>Age and Sex</b>  | Female <1               | 24 (85.7)       | 4 (14.3)     |
|                     | Female 1-4              | 171 (74.0)      | 60 (26.0)    |
|                     | Female 5-9              | 117 (79.1)      | 31 (20.9)    |
|                     | Female 10-15            | 88 (80.7)       | 21 (19.3)    |
|                     | Male <1                 | 40 (95.2)       | 2 (4.8)      |
|                     | Male 1-4                | 199 (78.0)      | 56 (22.0)    |
|                     | Male 5-9                | 122 (82.4)      | 26 (17.6)    |
|                     | Male 10-15              | 91 (92.9)       | 7 (7.1)      |
| <b>Ethnicity</b>    | White                   | 552 (80.5)      | 134 (19.5)   |
|                     | Non-white               | 138 (88.5)      | 18 (11.5)    |
|                     | Unknown                 | 162 (74.7)      | 55 (23.4)    |
| <b>IMD Quintile</b> | 1 (Least Disadvantaged) | 198 (80.8)      | 47 (19.2)    |
|                     | 2                       | 186 (84.2)      | 35 (15.8)    |
|                     | 3                       | 166 (75.8)      | 53 (24.2)    |
|                     | 4                       | 142 (76.8)      | 43 (23.2)    |
|                     | 5 (Most Disadvantaged)  | 160 (84.7)      | 29 (15.3)    |
| <b>Travel</b>       | Yes                     | 128 (85.3)      | 22 (14.7)    |
|                     | No                      | 724 (79.7)      | 185 (20.4)   |
| <b>Rurality</b>     | Rural                   | 230 (80.4)      | 56 (19.6)    |
|                     | Urban                   | 622 (80.5)      | 151 (19.5)   |
| <b>Region</b>       | East Midlands           | 65 (81.3)       | 15 (18.8)    |
|                     | East of England         | 57 (80.3)       | 14 (19.7)    |
|                     | London                  | 93 (81.6)       | 21 (18.4)    |
|                     | North East              | 64 (77.1)       | 19 (22.9)    |
|                     | North West              | 153 (77.7)      | 44 (22.3)    |
|                     | South East              | 92 (78.6)       | 25 (21.4)    |
|                     | South West              | 101 (75.9)      | 32 (24.1)    |
|                     | West Midlands           | 96 (84.2)       | 18 (15.8)    |
|                     | Yorkshire and Humber    | 131 (87.3)      | 19 (12.7)    |
| <b>Stx</b>          | Stx1                    | 17 (94.4)       | 1 (5.6)      |
|                     | Stx2                    | 609 (81.7)      | 136 (18.3)   |
|                     | Stx1+2                  | 219 (96.9)      | 7 (3.1)      |
|                     | Serology                | 7 (10.6)        | 59 (89.4)    |
|                     | Unknown                 | 0 (0.0)         | 4 (100.0)    |
| <b>Symptoms</b>     | Diarrhoea               | 803 (80.3)      | 197 (19.7)   |
|                     | Bloody diarrhoea        | 432 (74.0)      | 152 (26.0)   |
|                     | Nausea                  | 278 (75.8)      | 89 (24.3)    |
|                     | Vomiting                | 330 (66.1)      | 169 (33.9)   |
|                     | Abdominal pain          | 574 (78.2)      | 160 (21.8)   |

|                           |                          |            |            |
|---------------------------|--------------------------|------------|------------|
|                           | Fever                    | 273 (76.7) | 83 (23.3)  |
| <b>Healthcare contact</b> | Antibiotics              | 53 (40.8)  | 77 (59.2)  |
|                           | NHS Direct               | 67 (72.0)  | 26 (28.0)  |
|                           | GP                       | 570 (83.7) | 111 (16.3) |
|                           | A&E                      | 186 (66.9) | 92 (33.1)  |
|                           | Other healthcare contact | 98 (74.8)  | 33 (25.2)  |
|                           | Hospital                 | 223 (52.4) | 203 (47.6) |

HUS – haemolytic uraemic syndrome; *stx* – Shiga toxin; NHS Direct – National Health Service telephone advice line, now NHS 111; GP – General Practitioner; A&E – accident and emergency

Confidential: For Review Only

Table 2: Adjusted and unadjusted regression analysis (n=989)

| Variable                     | Category                | n (%)      | Unadjusted      |              | Adjusted <sup>a</sup> |                     | p value <sup>b</sup> |
|------------------------------|-------------------------|------------|-----------------|--------------|-----------------------|---------------------|----------------------|
|                              |                         |            | Odds Ratio      | (95% CI)     | Odds Ratio            | (95% CI)            |                      |
| <b>Age group</b>             | <1                      | 67 (6.8)   | 0.19            | (0.06-0.62)  | <b>0.21</b>           | <b>(0.05-0.82)</b>  | <b>0.03</b>          |
|                              | 1-4                     | 456 (46.1) | 1.0 (reference) |              | 1.0 (reference)       |                     |                      |
|                              | 5-9                     | 274 (27.7) | 0.62            | (0.40-0.94)  | <b>0.43</b>           | <b>(0.25-0.74)</b>  | <b>0.002</b>         |
|                              | 10-15                   | 192 (19.4) | 0.34            | (0.19-0.61)  | <b>0.20</b>           | <b>(0.09-0.43)</b>  | <b>&lt;0.001</b>     |
| <b>Sex</b>                   | Male                    | 513 (51.9) | 1.0 (reference) |              | 1.0 (reference)       |                     |                      |
|                              | Female                  | 476 (48.1) | 1.37            | (0.96-1.96)  | 1.38                  | (0.88-2.14)         | 0.16                 |
| <b>Ethnicity<sup>‡</sup></b> | White                   | 797 (80.6) | 1.0 (reference) |              | 1.0 (reference)       |                     |                      |
|                              | Non-White               | 192 (19.4) | 0.39            | (0.18-0.81)  | <b>0.28</b>           | <b>(0.11-0.74)</b>  | <b>0.01</b>          |
| <b>Travel</b>                | No                      | 850 (86.0) | 1.0 (reference) |              | 1.0 (reference)       |                     |                      |
|                              | Yes                     | 139 (14.0) | 0.46            | (0.24-0.88)  | 0.64                  | (0.28-1.45)         | 0.28                 |
| <b>Rurality</b>              | Urban                   | 719 (72.7) | 1.0 (reference) |              | 1.0 (reference)       |                     |                      |
|                              | Rural                   | 270 (27.3) | 1.21            | (0.82-1.77)  | 0.88                  | (0.52-1.48)         | 0.63                 |
| <b>IMD Quintile</b>          | 1 (least disadvantaged) | 231 (23.4) | 1.0 (reference) |              | 1.0 (reference)       |                     |                      |
|                              | 2                       | 210 (21.2) | 0.83            | (0.48-1.42)  | 0.64                  | (0.32-1.27)         | 0.20                 |
|                              | 3                       | 204 (20.6) | 1.28            | (0.77-2.12)  | 1.01                  | (0.54-1.91)         | 0.97                 |
|                              | 4                       | 170 (17.2) | 1.10            | (0.64-1.90)  | 1.10                  | (0.54-2.26)         | 0.79                 |
|                              | 5 (most disadvantaged)  | 174 (17.6) | 0.57            | (0.30-1.06)  | 0.57                  | (0.25-1.31)         | 0.18                 |
| <b>Region</b>                | East Midlands           | 72 (7.3)   | 0.62            | (0.24-1.59)  | 0.59                  | (0.18-1.92)         | 0.39                 |
|                              | East of England         | 66 (6.7)   | 1.03            | (0.44-2.42)  | 1.12                  | (0.37-3.37)         | 0.84                 |
|                              | London                  | 108 (10.9) | 1.0 (reference) |              | 1.0 (reference)       |                     |                      |
|                              | North East              | 76 (7.7)   | 1.19            | (0.53-2.64)  | 0.71                  | (0.26-1.97)         | 0.51                 |
|                              | North West              | 185 (18.7) | 1.20            | (0.63-2.31)  | 1.02                  | (0.44-2.37)         | 0.97                 |
|                              | South East              | 107 (10.8) | 1.09            | (0.52-2.28)  | 1.31                  | (0.48-3.63)         | 0.60                 |
|                              | South West              | 127 (12.8) | 1.48            | (0.75-2.93)  | 1.25                  | (0.50-3.13)         | 0.63                 |
|                              | West Midlands           | 104 (10.5) | 0.54            | (0.23-1.29)  | 0.53                  | (0.18-1.53)         | 0.24                 |
|                              | Yorkshire and Humber    | 144 (14.6) | 0.62            | (0.29-1.33)  | 0.52                  | (0.20-1.34)         | 0.17                 |
| <b>Stx</b>                   | Stx1+2                  | 226 (22.9) | 1.0 (reference) |              | 1.0 (reference)       |                     |                      |
|                              | Stx1                    | 18 (1.8)   | 1.84            | (0.21-15.84) | 5.53                  | (0.53-57.42)        | 0.15                 |
|                              | Stx2                    | 745 (75.3) | 6.99            | (3.22-15.17) | <b>5.92</b>           | <b>(2.49-14.10)</b> | <b>&lt;0.001</b>     |
| <b>Antibiotics</b>           | No                      | 887 (89.7) | 1.0 (reference) |              | 1.0 (reference)       |                     |                      |



|                         |     |            |                 |              |                 |                     |                  |
|-------------------------|-----|------------|-----------------|--------------|-----------------|---------------------|------------------|
|                         | Yes | 102 (10.3) | 8.54            | (5.48-13.30) | <b>8.46</b>     | <b>(4.71-15.18)</b> | <b>&lt;0.001</b> |
| <b>Diarrhoea</b>        | No  | 49 (5.0)   | 1.0 (reference) |              | 1.0 (reference) |                     |                  |
|                         | Yes | 940 (95.0) | 8.61            | (1.18-62.89) | 4.04            | (0.50-32.59)        | 0.19             |
| <b>Bloody diarrhoea</b> | No  | 440 (44.5) | 1.0 (reference) |              | 1.0 (reference) |                     |                  |
|                         | Yes | 549 (55.5) | 4.85            | (3.07-8.00)  | <b>3.56</b>     | <b>(2.04-6.24)</b>  | <b>&lt;0.001</b> |
| <b>Nausea</b>           | No  | 653 (66.0) | 1.0 (reference) |              | 1.0 (reference) |                     |                  |
|                         | Yes | 336 (34.0) | 1.52            | (1.06-2.18)  | 1.12            | (0.67-1.86)         | 0.66             |
| <b>Vomiting</b>         | No  | 549 (55.5) | 1.0 (reference) |              | 1.0 (reference) |                     |                  |
|                         | Yes | 440 (44.5) | 6.05            | (3.95-9.26)  | <b>4.47</b>     | <b>(2.62-7.63)</b>  | <b>&lt;0.001</b> |
| <b>Abdominal pain</b>   | No  | 309 (31.2) | 1.0 (reference) |              | 1.0 (reference) |                     |                  |
|                         | Yes | 680 (68.8) | 1.49            | (0.99-2.25)  | 0.82            | (0.46-1.46)         | 0.50             |
| <b>Fever</b>            | No  | 657 (66.4) | 1.0 (reference) |              | 1.0 (reference) |                     |                  |
|                         | Yes | 332 (33.6) | 1.50            | (1.05-2.16)  | 1.05            | (0.67-1.66)         | 0.82             |

<sup>a</sup>Adjusted for all other covariates in the model; <sup>b</sup>Statistical significance of relationship between HUS and each variable tested using  $\chi^2$  test ; *stx* – Shiga toxin gene; <sup>#</sup>Multiply imputed variable

1  
2  
3 **SUPPLEMENTARY DATA**  
4

5 Supplementary Table 1a: Clinical case definition for HUS  
6

7 A child (aged <16 years of age) who has:

8 Acute kidney injury (AKI) defined by oligoanuria and/or elevated creatinine for age  
9

10 AND

11  
12 Microangiopathic haemolytic anaemia (MAHA) defined by haemoglobin level <10 g/L with  
13 fragmented erythrocytes  
14

15 AND/OR

16  
17 Thrombocytopenia defined by a platelet count of <130,000 × 10<sup>9</sup>/L  
18

19 WITHOUT septicaemia, malignant hypertension, chronic uraemia, or primary vascular disease  
20

21 Elevated creatinine levels differed by age group and were those above the thresholds in Table 1  
22  
23

24  
25 Supplementary Table 1b: Creatinine level (micromol/L) thresholds by age group  
26

| Age Group   | Normal Creatinine threshold (micromol/L) |
|-------------|------------------------------------------|
| 0-7 days    | 100                                      |
| 8-14 days   | 80                                       |
| 15-28 days  | 55                                       |
| 1m-3 years  | 40                                       |
| 4-6 years   | 46                                       |
| 7-9 years   | 56                                       |
| 10-12 years | 60                                       |
| 13-15 years | 80                                       |

27  
28  
29  
30  
31  
32  
33  
34  
35  
36  
37  
38  
39  
40  
41  
42  
43  
44  
45  
46  
47  
48  
49  
50  
51  
52  
53  
54  
55  
56  
57  
58  
59  
60

Supplementary Table 2: Adjusted and unadjusted regression analysis - Sensitivity analysis excluding travel cases (n subjects=850)

| Variable     | Category                | n (%)      | Unadjusted      |              | Adjusted <sup>a</sup> |                      | p value          |
|--------------|-------------------------|------------|-----------------|--------------|-----------------------|----------------------|------------------|
|              |                         |            | Odds Ratio      | (95% CI)     | Odds Ratio            | (95% CI)             |                  |
| Age group    | <1                      | 55 (6.5)   | 0.14            | (0.03-0.59)  | <b>0.12</b>           | <b>(0.02-0.62)</b>   | <b>0.01</b>      |
|              | 1-4                     | 400 (47.1) | 1.0 (reference) |              | 1.0 (reference)       |                      |                  |
|              | 5-9                     | 242 (28.5) | 0.61            | (0.39-0.94)  | <b>0.45</b>           | <b>(0.25-0.79)</b>   | <b>0.005</b>     |
|              | 10-15                   | 153 (18.0) | 0.32            | (0.17-0.60)  | <b>0.17</b>           | <b>(0.07-0.39)</b>   | <b>&lt;0.001</b> |
| Sex          | Male                    | 445 (52.4) | 1.0 (reference) |              | 1.0 (reference)       |                      |                  |
|              | Female                  | 405 (47.7) | 1.31            | (0.91-1.90)  | 1.30                  | (0.81-2.08)          | 0.27             |
| Ethnicity    | White                   | 700 (82.4) | 1.0 (reference) |              | 1.0 (reference)       |                      |                  |
|              | Non-White               | 150 (17.6) | 0.41            | (0.20-0.83)  | <b>0.27</b>           | <b>(0.10-0.73)</b>   | <b>0.01</b>      |
| Rurality     | Urban                   | 606 (71.3) | 1.0 (reference) |              | 1.0 (reference)       |                      |                  |
|              | Rural                   | 244 (28.7) | 1.28            | (0.86-1.90)  | 1.07                  | (0.62-1.86)          | 0.80             |
| IMD Quintile | 1 (least disadvantaged) | 196 (23.1) | 1.0 (reference) |              | 1.0 (reference)       |                      |                  |
|              | 2                       | 184 (21.7) | 0.88            | (0.50-1.54)  | 0.75                  | (0.36-1.53)          | 0.43             |
|              | 3                       | 180 (21.2) | 1.24            | (0.73-2.10)  | 1.06                  | (0.54-2.10)          | 0.86             |
|              | 4                       | 150 (17.7) | 1.07            | (0.61-1.90)  | 1.14                  | (0.53-2.46)          | 0.74             |
|              | 5 (most disadvantaged)  | 140 (16.5) | 0.52            | (0.26-1.04)  | 0.57                  | (0.23-1.43)          | 0.23             |
| Region       | East Midlands           | 61 (7.2)   | 0.54            | (0.19-1.49)  | 0.49                  | (0.14-1.80)          | 0.29             |
|              | East of England         | 55 (6.5)   | 0.84            | (0.33-2.16)  | 1.02                  | (0.30-3.44)          | 0.98             |
|              | London                  | 83 (9.8)   | 1.0 (reference) |              | 1.0 (reference)       |                      |                  |
|              | North East              | 71 (8.4)   | 0.90            | (0.38-2.14)  | 0.59                  | (0.19-1.81)          | 0.35             |
|              | North West              | 172 (20.2) | 1.13            | (0.56-2.25)  | 1.06                  | (0.42-2.67)          | 0.90             |
|              | South East              | 73 (8.6)   | 1.27            | (0.58-2.86)  | 1.78                  | (0.57-5.56)          | 0.32             |
|              | South West              | 110 (12.9) | 1.38            | (0.66-2.86)  | 1.14                  | (0.42-3.11)          | 0.80             |
|              | West Midlands           | 95 (11.2)  | 0.52            | (0.21-1.26)  | 0.57                  | (0.18-1.78)          | 0.33             |
|              | Yorkshire and Humber    | 130 (15.3) | 0.59            | (0.27-1.32)  | 0.53                  | (0.19-1.47)          | 0.22             |
| Stx          | Stx1+2                  | 183 (21.5) | 1.0 (reference) |              | 1.0 (reference)       |                      |                  |
|              | Stx1                    | 8 (0.9)    | 4.21            | (0.45-39.89) | <b>24.71</b>          | <b>(1.86-328.34)</b> | <b>0.02</b>      |
|              | Stx2                    | 659 (77.5) | 6.97            | (3.02-16.10) | <b>6.08</b>           | <b>(2.32-15.92)</b>  | <b>&lt;0.001</b> |
| Antibiotics  | No                      | 766 (90.1) | 1.0 (reference) |              | 1.0 (reference)       |                      |                  |
|              | Yes                     | 84 (9.9)   | 10.0            | (6.18-16.32) | <b>10.89</b>          | <b>(5.65-20.97)</b>  | <b>&lt;0.001</b> |
| Diarrhea     | No                      | 48 (6.6)   | 1.0 (reference) |              | 1.0 (reference)       |                      |                  |
|              | Yes                     | 802 (94.4) | 9.26            | (1.27-67.70) | 4.00                  | (0.48-33.16)         | 0.20             |

1  
2  
3  
4  
5  
6  
7  
8  
9  
10  
11  
12  
13  
14  
15  
16  
17  
18  
19  
20  
21  
22  
23  
24  
25  
26  
27  
28  
29  
30  
31  
32  
33  
34  
35  
36  
37  
38  
39  
40  
41  
42  
43  
44  
45  
46

|                        |     |            |                 |              |                 |                    |                  |
|------------------------|-----|------------|-----------------|--------------|-----------------|--------------------|------------------|
| <b>Bloody diarrhea</b> | No  | 360 (42.4) | 1.0 (reference) |              | 1.0 (reference) |                    |                  |
|                        | Yes | 490 (57.7) | 5.10            | (3.10-8.38)  | <b>3.70</b>     | <b>(2.00-6.85)</b> | <b>&lt;0.001</b> |
| <b>Nausea</b>          | No  | 562 (66.1) | 1.0 (reference) |              | 1.0 (reference) |                    |                  |
|                        | Yes | 288 (33.9) | 1.52            | (1.04-2.22)  | 1.03            | (0.60-1.76)        | 0.92             |
| <b>Vomiting</b>        | No  | 465 (54.7) | 1.0 (reference) |              | 1.0 (reference) |                    |                  |
|                        | Yes | 385 (45.3) | 6.50            | (4.13-10.23) | <b>5.25</b>     | <b>(2.94-9.38)</b> | <b>&lt;0.001</b> |
| <b>Abdominal pain</b>  | No  | 259 (30.5) | 1.0 (reference) |              | 1.0 (reference) |                    |                  |
|                        | Yes | 591 (69.5) | 1.39            | (0.91-2.13)  | 0.73            | (0.39-1.36)        | 0.32             |
| <b>Fever</b>           | No  | 569 (66.9) | 1.0 (reference) |              | 1.0 (reference) |                    |                  |
|                        | Yes | 281 (33.1) | 1.71            | (1.17-2.50)  | 1.28            | (0.79-2.09)        | 0.32             |

aAdjusted for all other covariates in the model; *stx* – shiga toxin gene

Confidential: For Review Only

Supplementary Table 3: Adjusted and unadjusted regression analysis - Sensitivity analysis excluding ethnicity variable (n subjects=989)

| Variable     | Category                | n (%)      | Unadjusted      |                 | Adjusted <sup>a</sup> |                     | p value          |
|--------------|-------------------------|------------|-----------------|-----------------|-----------------------|---------------------|------------------|
|              |                         |            | Odds Ratio      | (95% CI)        | Odds Ratio            | (95% CI)            |                  |
| Age group    | <1                      | 67 (6.8)   | 0.19            | (0.06-0.62)     | <b>0.24</b>           | <b>(0.06-0.92)</b>  | <b>0.04</b>      |
|              | 1-4                     | 456 (46.1) | 1.0 (reference) |                 | 1.0 (reference)       |                     |                  |
|              | 5-9                     | 274 (27.7) | 0.62            | (0.40-0.94)     | <b>0.45</b>           | <b>(0.26-0.76)</b>  | <b>0.003</b>     |
|              | 10-15                   | 192 (19.4) | 0.34            | (0.19-0.61)     | <b>0.22</b>           | <b>(0.11-0.47)</b>  | <b>&lt;0.001</b> |
| Sex          | Male                    | 513 (51.9) | 1.0 (reference) |                 | 1.0 (reference)       |                     |                  |
|              | Female                  | 476 (48.1) | 1.37            | (0.96-1.96)     | 1.40                  | (0.91-2.16)         | 0.13             |
| Travel       | No                      | 850 (86.0) | 1.0 (reference) |                 | 1.0 (reference)       |                     |                  |
|              | Yes                     | 139 (14.0) | 0.46            | (0.24-0.88)     | 0.58                  | (0.26-1.28)         | 0.18             |
| Rurality     | Urban                   | 719 (72.7) | 1.0 (reference) |                 | 1.0 (reference)       |                     |                  |
|              | Rural                   | 270 (27.3) | 1.21            | (0.82-1.77)     | 0.97                  | (0.58-1.62)         | 0.90             |
| IMD Quintile | 1 (least disadvantaged) | 231 (23.4) | 1.0 (reference) |                 | 1.0 (reference)       |                     |                  |
|              | 2                       | 210 (21.2) | 0.83            | (0.48-1.42)     | 0.65                  | (0.33-1.27)         | 0.21             |
|              | 3                       | 204 (20.6) | 1.28            | (0.77-2.12)     | 0.98                  | (0.51-1.79)         | 0.89             |
|              | 4                       | 170 (17.2) | 1.10            | (0.64-1.89)     | 0.96                  | (0.48-1.94)         | 0.91             |
|              | 5 (most disadvantaged)  | 174 (17.6) | 0.57            | (0.30-1.06)     | <b>0.41</b>           | <b>(0.19-0.90)</b>  | <b>0.03</b>      |
| Region       | East Midlands           | 72 (7.3)   | 0.62            | (0.24-1.59)     | 0.65                  | (0.21-2.02)         | 0.45             |
|              | East of England         | 66 (6.7)   | 1.03            | (0.44-2.42)     | 1.37                  | (0.47-4.00)         | 0.56             |
|              | London                  | 108 (10.9) | 1.0 (reference) |                 | 1.0 (reference)       |                     |                  |
|              | North East              | 76 (7.7)   | 1.19            | (0.53-2.64)     | 1.02                  | (0.38-2.71)         | 0.97             |
|              | North West              | 185 (18.7) | 1.20            | (0.63-2.31)     | 1.29                  | (0.57-2.90)         | 0.54             |
|              | South East              | 107 (10.8) | 1.09            | (0.52-2.28)     | 1.74                  | (0.65-4.63)         | 0.27             |
|              | South West              | 127 (12.8) | 1.48            | (0.75-2.93)     | 1.64                  | (0.68-3.99)         | 0.27             |
|              | West Midlands           | 104 (10.5) | 0.54            | (0.23-1.29)     | 0.67                  | (0.24-1.86)         | 0.44             |
|              | Yorkshire and Humber    | 144 (14.6) | 0.62            | (0.29-1.33)     | 0.60                  | (0.24-1.52)         | 0.28             |
|              | Stx                     | Stx1+2     | 226 (22.9)      | 1.0 (reference) |                       | 1.0 (reference)     |                  |
| Stx1         |                         | 18 (1.8)   | 1.84            | (0.21-15.84)    | 5.34                  | (0.54-52.82)        | 0.15             |
| Stx2         |                         | 745 (75.3) | 6.99            | (3.22-15.17)    | <b>5.76</b>           | <b>(2.43-13.67)</b> | <b>&lt;0.001</b> |
| Antibiotics  | No                      | 887 (89.7) | 1.0 (reference) |                 | 1.0 (reference)       |                     |                  |
|              | Yes                     | 102 (10.3) | 8.54            | (5.48-13.30)    | <b>7.46</b>           | <b>(4.27-13.03)</b> | <b>&lt;0.001</b> |
| Diarrhea     | No                      | 49 (5.0)   | 1.0 (reference) |                 | 1.0 (reference)       |                     |                  |
|              | Yes                     | 940 (95.0) | 8.61            | (1.18-62.89)    | 4.09                  | (0.51-32.47)        | 0.18             |

1  
2  
3  
4  
5  
6  
7  
8  
9  
10  
11  
12  
13  
14  
15  
16  
17  
18  
19  
20  
21  
22  
23  
24  
25  
26  
27  
28  
29  
30  
31  
32  
33  
34  
35  
36  
37  
38  
39  
40  
41  
42  
43  
44  
45  
46

|                        |     |            |                 |             |                 |                    |                  |
|------------------------|-----|------------|-----------------|-------------|-----------------|--------------------|------------------|
| <b>Bloody diarrhea</b> | No  | 440 (44.5) | 1.0 (reference) |             | 1.0 (reference) |                    |                  |
|                        | Yes | 549 (55.5) | 4.85            | (3.07-7.67) | <b>3.74</b>     | <b>(2.15-6.49)</b> | <b>&lt;0.001</b> |
| <b>Nausea</b>          | No  | 653 (66.0) | 1.0 (reference) |             | 1.0 (reference) |                    |                  |
|                        | Yes | 336 (34.0) | 1.52            | (1.06-2.18) | 1.11            | (0.67-1.83)        | 0.69             |
| <b>Vomiting</b>        | No  | 549 (55.5) | 1.0 (reference) |             | 1.0 (reference) |                    |                  |
|                        | Yes | 440 (44.5) | 6.05            | (3.95-9.26) | <b>4.38</b>     | <b>(2.59-7.40)</b> | <b>&lt;0.001</b> |
| <b>Abdominal pain</b>  | No  | 309 (31.2) | 1.0 (reference) |             | 1.0 (reference) |                    |                  |
|                        | Yes | 680 (68.8) | 1.49            | (0.99-2.25) | 0.83            | (0.47-1.46)        | 0.52             |
| <b>Fever</b>           | No  | 657 (66.4) | 1.0 (reference) |             | 1.0 (reference) |                    |                  |
|                        | Yes | 332 (33.6) | 1.50            | (1.05-2.16) | 1.04            | (0.66-1.63)        | 0.86             |

aAdjusted for all other covariates in the model; *stx* – shiga toxin gene

Confidential: For Review Only

Supplementary Figure 1: Selection of participants to HUS Cohort Study

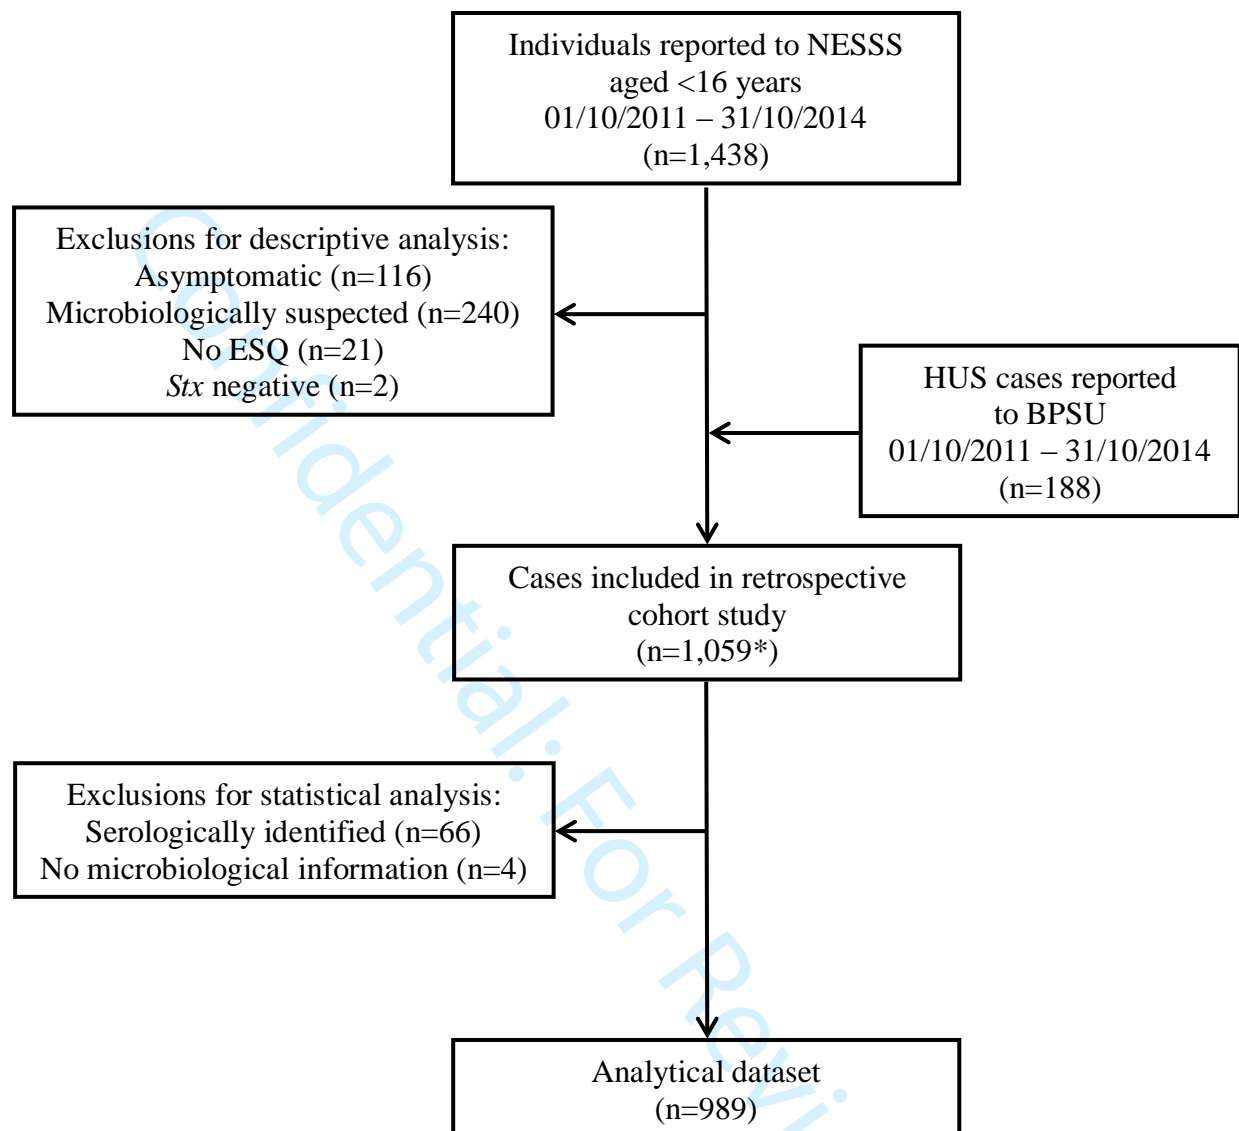

\*An additional 19 HUS cases not reported to BPSU were identified in NESSS; NESSS – National Enhanced Surveillance System for STEC; HUS – haemolytic uraemic syndrome; BPSU – British Paediatric Surveillance Unit; ESQ – enhanced surveillance questionnaire
