# Supplementary material for: Sociodemographic and clinical risk factors for paediatric typical haemolytic uraemic syndrome: retrospective cohort study
Source: PubMed Central journal article supplement (PMC6936988; doi:10.1136/bmjpo-2019-000465), 2019-12-17
Supplement: bmjpo-2019-000465supp001.pdf [file bmjpo-2019-000465supp001.pdf]

**SUPPLEMENTARY DATA**

## Supplementary Table 1a: Clinical case definition for HUS

---

A child (aged <16 years of age) who has:

---

Acute kidney injury (AKI) defined by oligoanuria and/or elevated creatinine for age

AND

Microangiopathic haemolytic anaemia (MAHA) defined by haemoglobin level <10 g/L with fragmented erythrocytes

AND/OR

Thrombocytopenia defined by a platelet count of <130,000 × 10<sup>9</sup>/L

WITHOUT septicaemia, malignant hypertension, chronic uraemia, or primary vascular disease

---

Elevated creatinine levels differed by age group and were those above the thresholds in Table 1

---

## Supplementary Table 1b: Creatinine level (micromol/L) thresholds by age group

| <b>Age Group</b> | <b>Normal<br/>Creatinine<br/>threshold<br/>(micromol/L)</b> |
|------------------|-------------------------------------------------------------|
| 0-7 days         | 100                                                         |
| 8-14 days        | 80                                                          |
| 15-28 days       | 55                                                          |
| 1m-3 years       | 40                                                          |
| 4-6 years        | 46                                                          |
| 7-9 years        | 56                                                          |
| 10-12 years      | 60                                                          |
| 13-15 years      | 80                                                          |

Supplementary Table 2: Adjusted and unadjusted regression analysis - Sensitivity analysis excluding travel cases (n subjects=850)

| Variable     | Category                | n (%)      | Unadjusted      |              | Adjusted <sup>a</sup> |                      | p value          |
|--------------|-------------------------|------------|-----------------|--------------|-----------------------|----------------------|------------------|
|              |                         |            | Odds Ratio      | (95% CI)     | Odds Ratio            | (95% CI)             |                  |
| Age group    | <1                      | 55 (6.5)   | 0.14            | (0.03-0.59)  | <b>0.12</b>           | <b>(0.02-0.62)</b>   | <b>0.01</b>      |
|              | 1-4                     | 400 (47.1) | 1.0 (reference) |              | 1.0 (reference)       |                      |                  |
|              | 5-9                     | 242 (28.5) | 0.61            | (0.39-0.94)  | <b>0.45</b>           | <b>(0.25-0.79)</b>   | <b>0.005</b>     |
|              | 10-15                   | 153 (18.0) | 0.32            | (0.17-0.60)  | <b>0.17</b>           | <b>(0.07-0.39)</b>   | <b>&lt;0.001</b> |
| Sex          | Male                    | 445 (52.4) | 1.0 (reference) |              | 1.0 (reference)       |                      |                  |
|              | Female                  | 405 (47.7) | 1.31            | (0.91-1.90)  | 1.30                  | (0.81-2.08)          | 0.27             |
| Ethnicity    | White                   | 700 (82.4) | 1.0 (reference) |              | 1.0 (reference)       |                      |                  |
|              | Non-White               | 150 (17.6) | 0.41            | (0.20-0.83)  | <b>0.27</b>           | <b>(0.10-0.73)</b>   | <b>0.01</b>      |
| Rurality     | Urban                   | 606 (71.3) | 1.0 (reference) |              | 1.0 (reference)       |                      |                  |
|              | Rural                   | 244 (28.7) | 1.28            | (0.86-1.90)  | 1.07                  | (0.62-1.86)          | 0.80             |
| IMD Quintile | 1 (least disadvantaged) | 196 (23.1) | 1.0 (reference) |              | 1.0 (reference)       |                      |                  |
|              | 2                       | 184 (21.7) | 0.88            | (0.50-1.54)  | 0.75                  | (0.36-1.53)          | 0.43             |
|              | 3                       | 180 (21.2) | 1.24            | (0.73-2.10)  | 1.06                  | (0.54-2.10)          | 0.86             |
|              | 4                       | 150 (17.7) | 1.07            | (0.61-1.90)  | 1.14                  | (0.53-2.46)          | 0.74             |
|              | 5 (most disadvantaged)  | 140 (16.5) | 0.52            | (0.26-1.04)  | 0.57                  | (0.23-1.43)          | 0.23             |
| Region       | East Midlands           | 61 (7.2)   | 0.54            | (0.19-1.49)  | 0.49                  | (0.14-1.80)          | 0.29             |
|              | East of England         | 55 (6.5)   | 0.84            | (0.33-2.16)  | 1.02                  | (0.30-3.44)          | 0.98             |
|              | London                  | 83 (9.8)   | 1.0 (reference) |              | 1.0 (reference)       |                      |                  |
|              | North East              | 71 (8.4)   | 0.90            | (0.38-2.14)  | 0.59                  | (0.19-1.81)          | 0.35             |
|              | North West              | 172 (20.2) | 1.13            | (0.56-2.25)  | 1.06                  | (0.42-2.67)          | 0.90             |
|              | South East              | 73 (8.6)   | 1.27            | (0.58-2.86)  | 1.78                  | (0.57-5.56)          | 0.32             |
|              | South West              | 110 (12.9) | 1.38            | (0.66-2.86)  | 1.14                  | (0.42-3.11)          | 0.80             |
|              | West Midlands           | 95 (11.2)  | 0.52            | (0.21-1.26)  | 0.57                  | (0.18-1.78)          | 0.33             |
|              | Yorkshire and Humber    | 130 (15.3) | 0.59            | (0.27-1.32)  | 0.53                  | (0.19-1.47)          | 0.22             |
| Stx          | Stx1+2                  | 183 (21.5) | 1.0 (reference) |              | 1.0 (reference)       |                      |                  |
|              | Stx1                    | 8 (0.9)    | 4.21            | (0.45-39.89) | <b>24.71</b>          | <b>(1.86-328.34)</b> | <b>0.02</b>      |
|              | Stx2                    | 659 (77.5) | 6.97            | (3.02-16.10) | <b>6.08</b>           | <b>(2.32-15.92)</b>  | <b>&lt;0.001</b> |
| Antibiotics  | No                      | 766 (90.1) | 1.0 (reference) |              | 1.0 (reference)       |                      |                  |
|              | Yes                     | 84 (9.9)   | 10.0            | (6.18-16.32) | <b>10.89</b>          | <b>(5.65-20.97)</b>  | <b>&lt;0.001</b> |
| Diarrhea     | No                      | 48 (6.6)   | 1.0 (reference) |              | 1.0 (reference)       |                      |                  |
|              | Yes                     | 802 (94.4) | 9.26            | (1.27-67.70) | 4.00                  | (0.48-33.16)         | 0.20             |

|                        |     |            |                 |              |                 |                    |                  |
|------------------------|-----|------------|-----------------|--------------|-----------------|--------------------|------------------|
| <b>Bloody diarrhea</b> | No  | 360 (42.4) | 1.0 (reference) |              | 1.0 (reference) |                    |                  |
|                        | Yes | 490 (57.7) | 5.10            | (3.10-8.38)  | <b>3.70</b>     | <b>(2.00-6.85)</b> | <b>&lt;0.001</b> |
| <b>Nausea</b>          | No  | 562 (66.1) | 1.0 (reference) |              | 1.0 (reference) |                    |                  |
|                        | Yes | 288 (33.9) | 1.52            | (1.04-2.22)  | 1.03            | (0.60-1.76)        | 0.92             |
| <b>Vomiting</b>        | No  | 465 (54.7) | 1.0 (reference) |              | 1.0 (reference) |                    |                  |
|                        | Yes | 385 (45.3) | 6.50            | (4.13-10.23) | <b>5.25</b>     | <b>(2.94-9.38)</b> | <b>&lt;0.001</b> |
| <b>Abdominal pain</b>  | No  | 259 (30.5) | 1.0 (reference) |              | 1.0 (reference) |                    |                  |
|                        | Yes | 591 (69.5) | 1.39            | (0.91-2.13)  | 0.73            | (0.39-1.36)        | 0.32             |
| <b>Fever</b>           | No  | 569 (66.9) | 1.0 (reference) |              | 1.0 (reference) |                    |                  |
|                        | Yes | 281 (33.1) | 1.71            | (1.17-2.50)  | 1.28            | (0.79-2.09)        | 0.32             |

aAdjusted for all other covariates in the model; *stx* – shiga toxin gene

Supplementary Table 3: Adjusted and unadjusted regression analysis - Sensitivity analysis excluding ethnicity variable (n subjects=989)

| Variable     | Category                | n (%)      | Unadjusted      |              | Adjusted <sup>a</sup> |                     | p value          |
|--------------|-------------------------|------------|-----------------|--------------|-----------------------|---------------------|------------------|
|              |                         |            | Odds Ratio      | (95% CI)     | Odds Ratio            | (95% CI)            |                  |
| Age group    | <1                      | 67 (6.8)   | 0.19            | (0.06-0.62)  | <b>0.24</b>           | <b>(0.06-0.92)</b>  | <b>0.04</b>      |
|              | 1-4                     | 456 (46.1) | 1.0 (reference) |              | 1.0 (reference)       |                     |                  |
|              | 5-9                     | 274 (27.7) | 0.62            | (0.40-0.94)  | <b>0.45</b>           | <b>(0.26-0.76)</b>  | <b>0.003</b>     |
|              | 10-15                   | 192 (19.4) | 0.34            | (0.19-0.61)  | <b>0.22</b>           | <b>(0.11-0.47)</b>  | <b>&lt;0.001</b> |
| Sex          | Male                    | 513 (51.9) | 1.0 (reference) |              | 1.0 (reference)       |                     |                  |
|              | Female                  | 476 (48.1) | 1.37            | (0.96-1.96)  | 1.40                  | (0.91-2.16)         | 0.13             |
| Travel       | No                      | 850 (86.0) | 1.0 (reference) |              | 1.0 (reference)       |                     |                  |
|              | Yes                     | 139 (14.0) | 0.46            | (0.24-0.88)  | 0.58                  | (0.26-1.28)         | 0.18             |
| Rurality     | Urban                   | 719 (72.7) | 1.0 (reference) |              | 1.0 (reference)       |                     |                  |
|              | Rural                   | 270 (27.3) | 1.21            | (0.82-1.77)  | 0.97                  | (0.58-1.62)         | 0.90             |
| IMD Quintile | 1 (least disadvantaged) | 231 (23.4) | 1.0 (reference) |              | 1.0 (reference)       |                     |                  |
|              | 2                       | 210 (21.2) | 0.83            | (0.48-1.42)  | 0.65                  | (0.33-1.27)         | 0.21             |
|              | 3                       | 204 (20.6) | 1.28            | (0.77-2.12)  | 0.98                  | (0.51-1.79)         | 0.89             |
|              | 4                       | 170 (17.2) | 1.10            | (0.64-1.89)  | 0.96                  | (0.48-1.94)         | 0.91             |
|              | 5 (most disadvantaged)  | 174 (17.6) | 0.57            | (0.30-1.06)  | <b>0.41</b>           | <b>(0.19-0.90)</b>  | <b>0.03</b>      |
| Region       | East Midlands           | 72 (7.3)   | 0.62            | (0.24-1.59)  | 0.65                  | (0.21-2.02)         | 0.45             |
|              | East of England         | 66 (6.7)   | 1.03            | (0.44-2.42)  | 1.37                  | (0.47-4.00)         | 0.56             |
|              | London                  | 108 (10.9) | 1.0 (reference) |              | 1.0 (reference)       |                     |                  |
|              | North East              | 76 (7.7)   | 1.19            | (0.53-2.64)  | 1.02                  | (0.38-2.71)         | 0.97             |
|              | North West              | 185 (18.7) | 1.20            | (0.63-2.31)  | 1.29                  | (0.57-2.90)         | 0.54             |
|              | South East              | 107 (10.8) | 1.09            | (0.52-2.28)  | 1.74                  | (0.65-4.63)         | 0.27             |
|              | South West              | 127 (12.8) | 1.48            | (0.75-2.93)  | 1.64                  | (0.68-3.99)         | 0.27             |
|              | West Midlands           | 104 (10.5) | 0.54            | (0.23-1.29)  | 0.67                  | (0.24-1.86)         | 0.44             |
|              | Yorkshire and Humber    | 144 (14.6) | 0.62            | (0.29-1.33)  | 0.60                  | (0.24-1.52)         | 0.28             |
| Stx          | Stx1+2                  | 226 (22.9) | 1.0 (reference) |              | 1.0 (reference)       |                     |                  |
|              | Stx1                    | 18 (1.8)   | 1.84            | (0.21-15.84) | 5.34                  | (0.54-52.82)        | 0.15             |
|              | Stx2                    | 745 (75.3) | 6.99            | (3.22-15.17) | <b>5.76</b>           | <b>(2.43-13.67)</b> | <b>&lt;0.001</b> |
| Antibiotics  | No                      | 887 (89.7) | 1.0 (reference) |              | 1.0 (reference)       |                     |                  |
|              | Yes                     | 102 (10.3) | 8.54            | (5.48-13.30) | <b>7.46</b>           | <b>(4.27-13.03)</b> | <b>&lt;0.001</b> |
| Diarrhea     | No                      | 49 (5.0)   | 1.0 (reference) |              | 1.0 (reference)       |                     |                  |
|              | Yes                     | 940 (95.0) | 8.61            | (1.18-62.89) | 4.09                  | (0.51-32.47)        | 0.18             |

|                        |     |            |                 |             |                 |                    |                  |
|------------------------|-----|------------|-----------------|-------------|-----------------|--------------------|------------------|
| <b>Bloody diarrhea</b> | No  | 440 (44.5) | 1.0 (reference) |             | 1.0 (reference) |                    |                  |
|                        | Yes | 549 (55.5) | 4.85            | (3.07-7.67) | <b>3.74</b>     | <b>(2.15-6.49)</b> | <b>&lt;0.001</b> |
| <b>Nausea</b>          | No  | 653 (66.0) | 1.0 (reference) |             | 1.0 (reference) |                    |                  |
|                        | Yes | 336 (34.0) | 1.52            | (1.06-2.18) | 1.11            | (0.67-1.83)        | 0.69             |
| <b>Vomiting</b>        | No  | 549 (55.5) | 1.0 (reference) |             | 1.0 (reference) |                    |                  |
|                        | Yes | 440 (44.5) | 6.05            | (3.95-9.26) | <b>4.38</b>     | <b>(2.59-7.40)</b> | <b>&lt;0.001</b> |
| <b>Abdominal pain</b>  | No  | 309 (31.2) | 1.0 (reference) |             | 1.0 (reference) |                    |                  |
|                        | Yes | 680 (68.8) | 1.49            | (0.99-2.25) | 0.83            | (0.47-1.46)        | 0.52             |
| <b>Fever</b>           | No  | 657 (66.4) | 1.0 (reference) |             | 1.0 (reference) |                    |                  |
|                        | Yes | 332 (33.6) | 1.50            | (1.05-2.16) | 1.04            | (0.66-1.63)        | 0.86             |

aAdjusted for all other covariates in the model; *stx* – shiga toxin gene

Supplementary Figure 1: Selection of participants to HUS Cohort Study

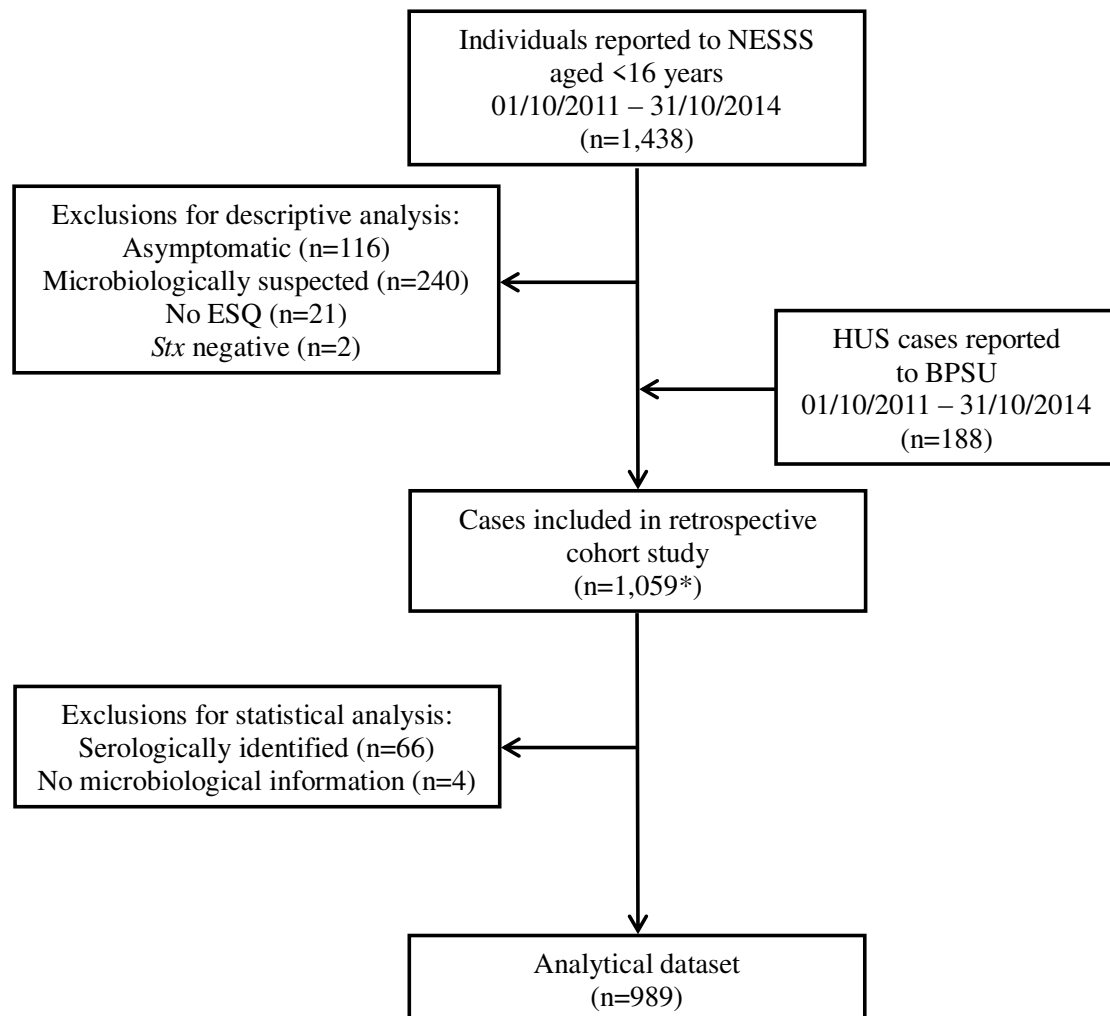

\*An additional 19 HUS cases not reported to BPSU were identified in NESSS; NESSS – National Enhanced Surveillance System for STEC; HUS – haemolytic uraemic syndrome; BPSU – British Paediatric Surveillance Unit; ESQ – enhanced surveillance questionnaire
